# Supplementary material for: Total synthesis of (±)-sacidumlignans D and A through Ueno–Stork radical cyclization reaction
Source: Royal Society of Chemistry journal article supplement (doi:10.1039/c3ob00053b), 2013-01-01
Supplement: c3ob00053b.pdf [file c3ob00053b.pdf]

Supporting Information for

## Total Synthesis of (±)-Sacidumlignans **D** and **A** through Ueno–Stork Radical Cyclization Reaction

Jian-Jian Zhang<sup>†</sup>, Chang-Song Yan<sup>†</sup>, Yu Peng\*, Zhen-Biao Luo, Xiao-Bo Xu and  
Ya-Wen Wang

*State Key Laboratory of Applied Organic Chemistry, Key Laboratory of Nonferrous Metals Chemistry and Resources Utilization of Gansu Province and College of Chemistry and Chemical Engineering, Lanzhou University, Lanzhou 730000, China*

pengyu@lzu.edu.cn

<sup>†</sup> These authors contributed equally to this work.

### Table of Contents

|                                                                                                                                                     |         |
|-----------------------------------------------------------------------------------------------------------------------------------------------------|---------|
| • <sup>1</sup> H NMR and <sup>13</sup> C NMR spectrum of <b>5</b> .....                                                                             | S3-S4   |
| • <sup>1</sup> H NMR and <sup>13</sup> C NMR spectrum of <b>6</b> .....                                                                             | S5-S6   |
| • <sup>1</sup> H NMR and <sup>13</sup> C NMR spectrum of <b>7</b> .....                                                                             | S7-S8   |
| • <sup>1</sup> H NMR and <sup>13</sup> C NMR spectrum of <b>8</b> .....                                                                             | S9-S10  |
| • <sup>1</sup> H NMR and <sup>13</sup> C NMR spectrum of <b>9</b> .....                                                                             | S11-S12 |
| • <sup>1</sup> H NMR and <sup>13</sup> C NMR spectrum of <b>10</b> .....                                                                            | S13-S14 |
| • <sup>1</sup> H NMR and <sup>13</sup> C NMR spectrum of <b>11</b> .....                                                                            | S15-S16 |
| • GC–MS, <sup>1</sup> H NMR, <sup>13</sup> C NMR, <sup>1</sup> H– <sup>1</sup> H COSY and NOE spectrum of <b>12</b> ( <i>the least polar</i> )..... | S17-S26 |
| • <sup>1</sup> H NMR and <sup>13</sup> C NMR spectrum of <b>9'</b> .....                                                                            | S27-S28 |
| • <sup>1</sup> H NMR and <sup>13</sup> C NMR spectrum of <b>13</b> .....                                                                            | S29-S30 |
| • <sup>1</sup> H NMR and <sup>13</sup> C NMR spectrum of <b>14</b> .....                                                                            | S31-S32 |
| • <sup>1</sup> H NMR and <sup>13</sup> C NMR spectrum of <b>15</b> .....                                                                            | S33-S34 |
| • <sup>1</sup> H NMR and <sup>13</sup> C NMR spectrum of <b>16</b> .....                                                                            | S35-S36 |
| • <sup>1</sup> H NMR and <sup>13</sup> C NMR spectrum of <b>17</b> .....                                                                            | S37-S38 |
| • <sup>1</sup> H NMR and <sup>13</sup> C NMR spectrum of <b>18</b> .....                                                                            | S39-S40 |

---

|                                                                                                                                                           |         |
|-----------------------------------------------------------------------------------------------------------------------------------------------------------|---------|
| ● $^1\text{H}$ NMR and $^{13}\text{C}$ NMR spectrum of <b>19</b> .....                                                                                    | S41-S42 |
| ● $^1\text{H}$ NMR and $^{13}\text{C}$ NMR spectrum of <b>20</b> .....                                                                                    | S43-S44 |
| ● $^1\text{H}$ NMR and $^{13}\text{C}$ NMR spectrum of <b>21</b> .....                                                                                    | S45-S46 |
| ● $^1\text{H}$ NMR, $^{13}\text{C}$ NMR, $^1\text{H}$ - $^1\text{H}$ COSY and NOE spectrum of <b>22</b> ( <i>more polar</i> ).....                        | S47-S53 |
| ● $^1\text{H}$ NMR and $^{13}\text{C}$ NMR spectrum of <b>23</b> .....                                                                                    | S54-S55 |
| ● $^1\text{H}$ NMR and $^{13}\text{C}$ NMR spectrum of <b>24</b> .....                                                                                    | S56-S57 |
| ● $^1\text{H}$ NMR and $^{13}\text{C}$ NMR spectrum of <b>25</b> .....                                                                                    | S58-S59 |
| ● $^1\text{H}$ NMR and $^{13}\text{C}$ NMR spectrum of ( $\pm$ )- <b>Sacidumlignan D (4)</b> (in $\text{CDCl}_3$ )..                                      | S60-S61 |
| ● $^1\text{H}$ NMR and $^{13}\text{C}$ /DEPT NMR spectrum of ( $\pm$ )- <b>Sacidumlignan D (4)</b> (in $\text{CD}_3\text{COCD}_3$ ).....                  | S62-S63 |
| ● $^1\text{H}$ NMR and $^{13}\text{C}$ NMR spectrum of <b>26</b> .....                                                                                    | S64-S65 |
| ● $^1\text{H}$ NMR and $^{13}\text{C}$ NMR spectrum of <b>27</b> ( <i>less polar</i> ).....                                                               | S66-S67 |
| ● $^1\text{H}$ NMR and $^{13}\text{C}$ NMR spectrum of <b>28</b> .....                                                                                    | S68-S69 |
| ● $^1\text{H}$ NMR and $^{13}\text{C}$ NMR spectrum of <b>Sacidumlignan A (1)</b> .....                                                                   | S70-S71 |
| ● The X-ray structures of <b>9</b> , ( $\pm$ )- <b>Sacidumlignan D (4)</b> and <b>Sacidumlignan A (1)</b> with thermal ellipsoids at 30% probability..... | S72-S74 |

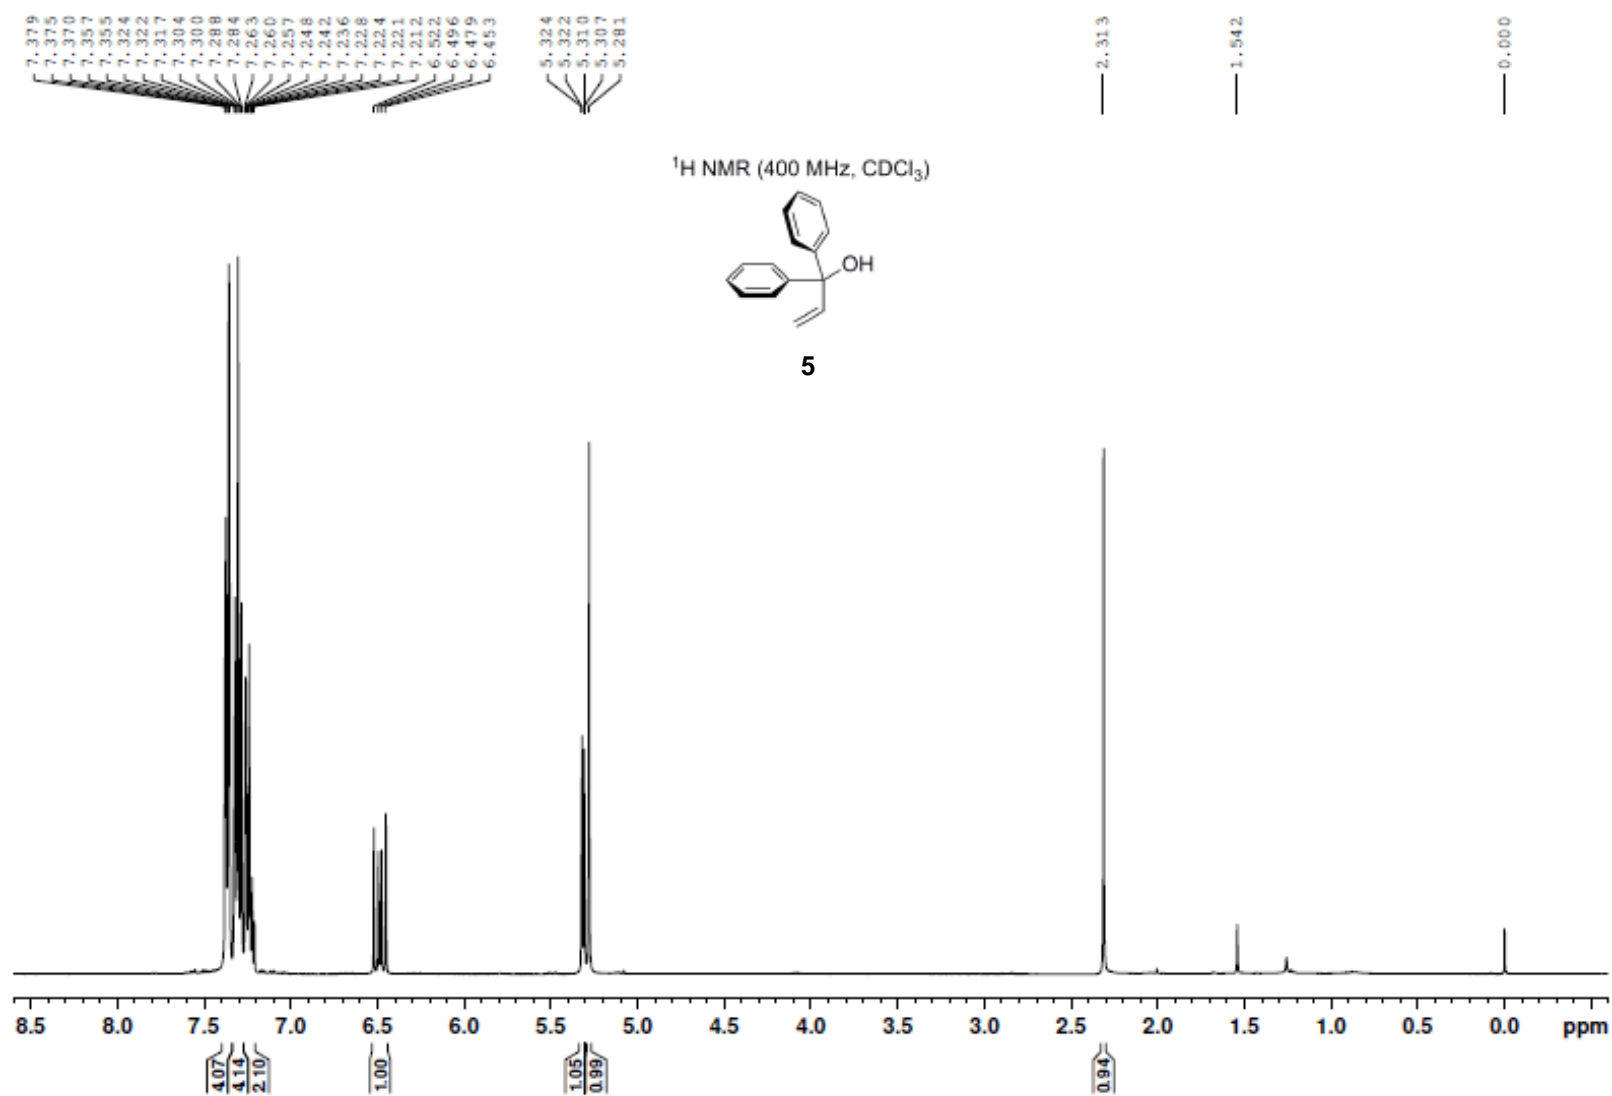

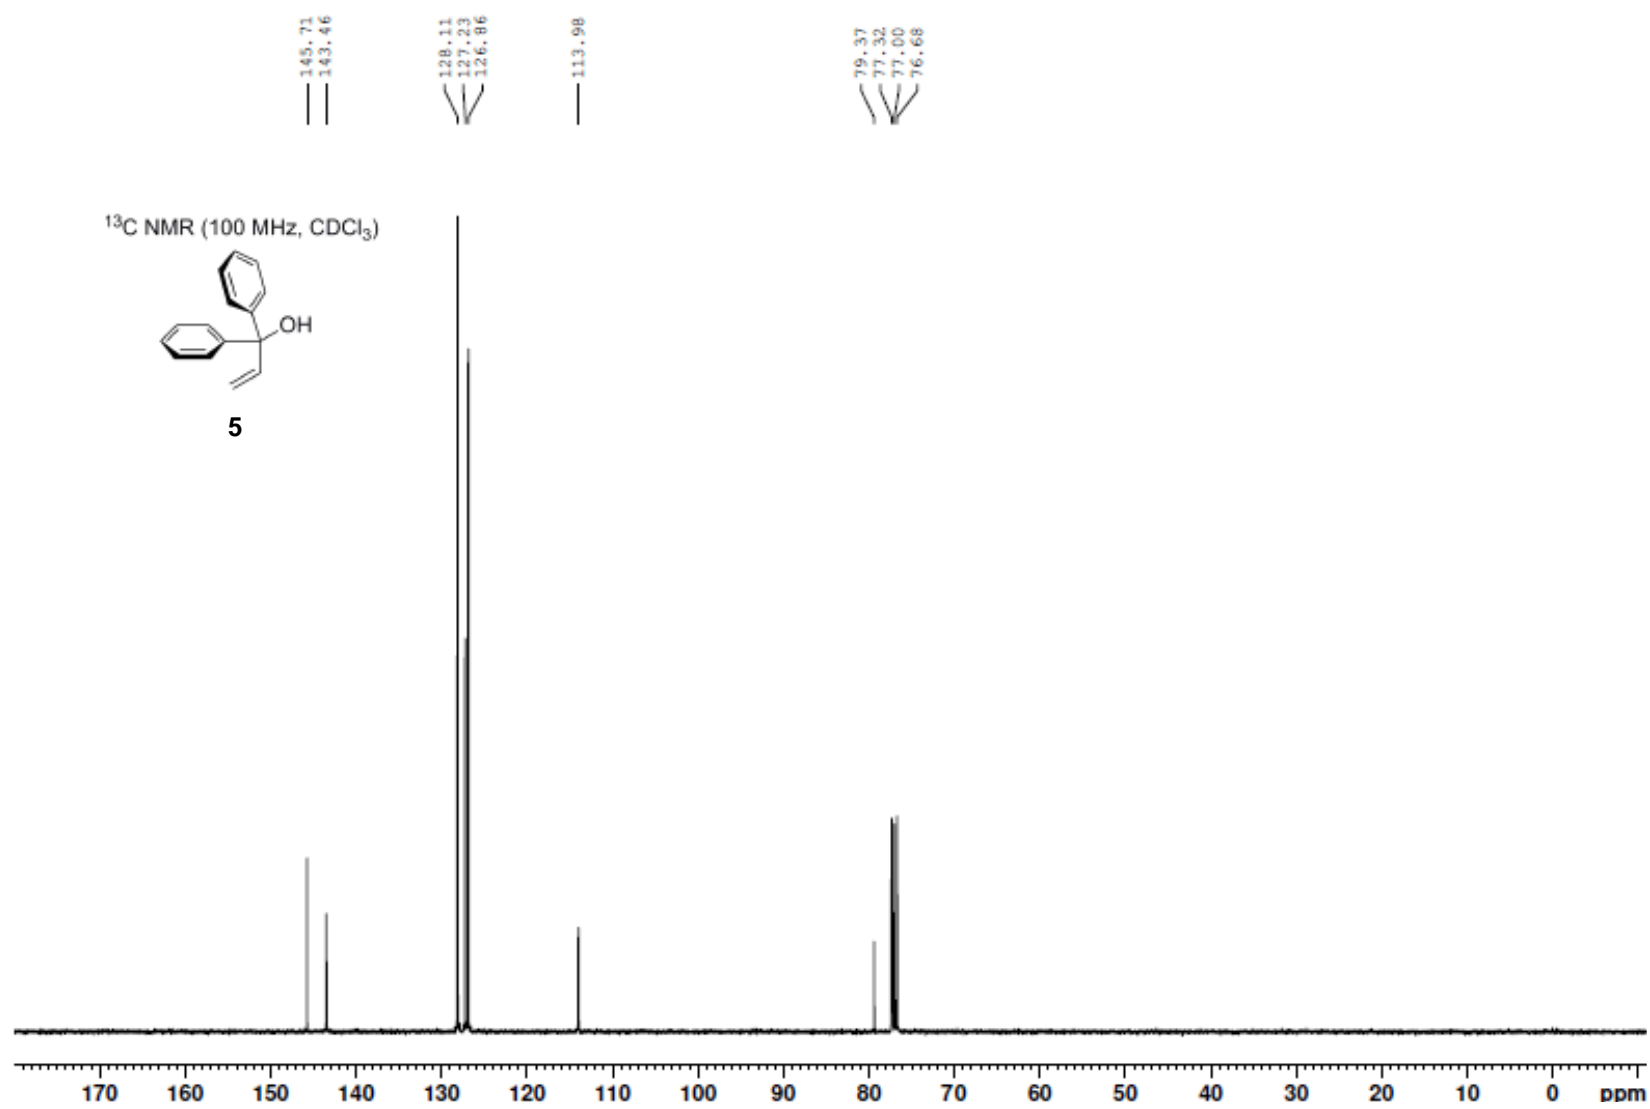

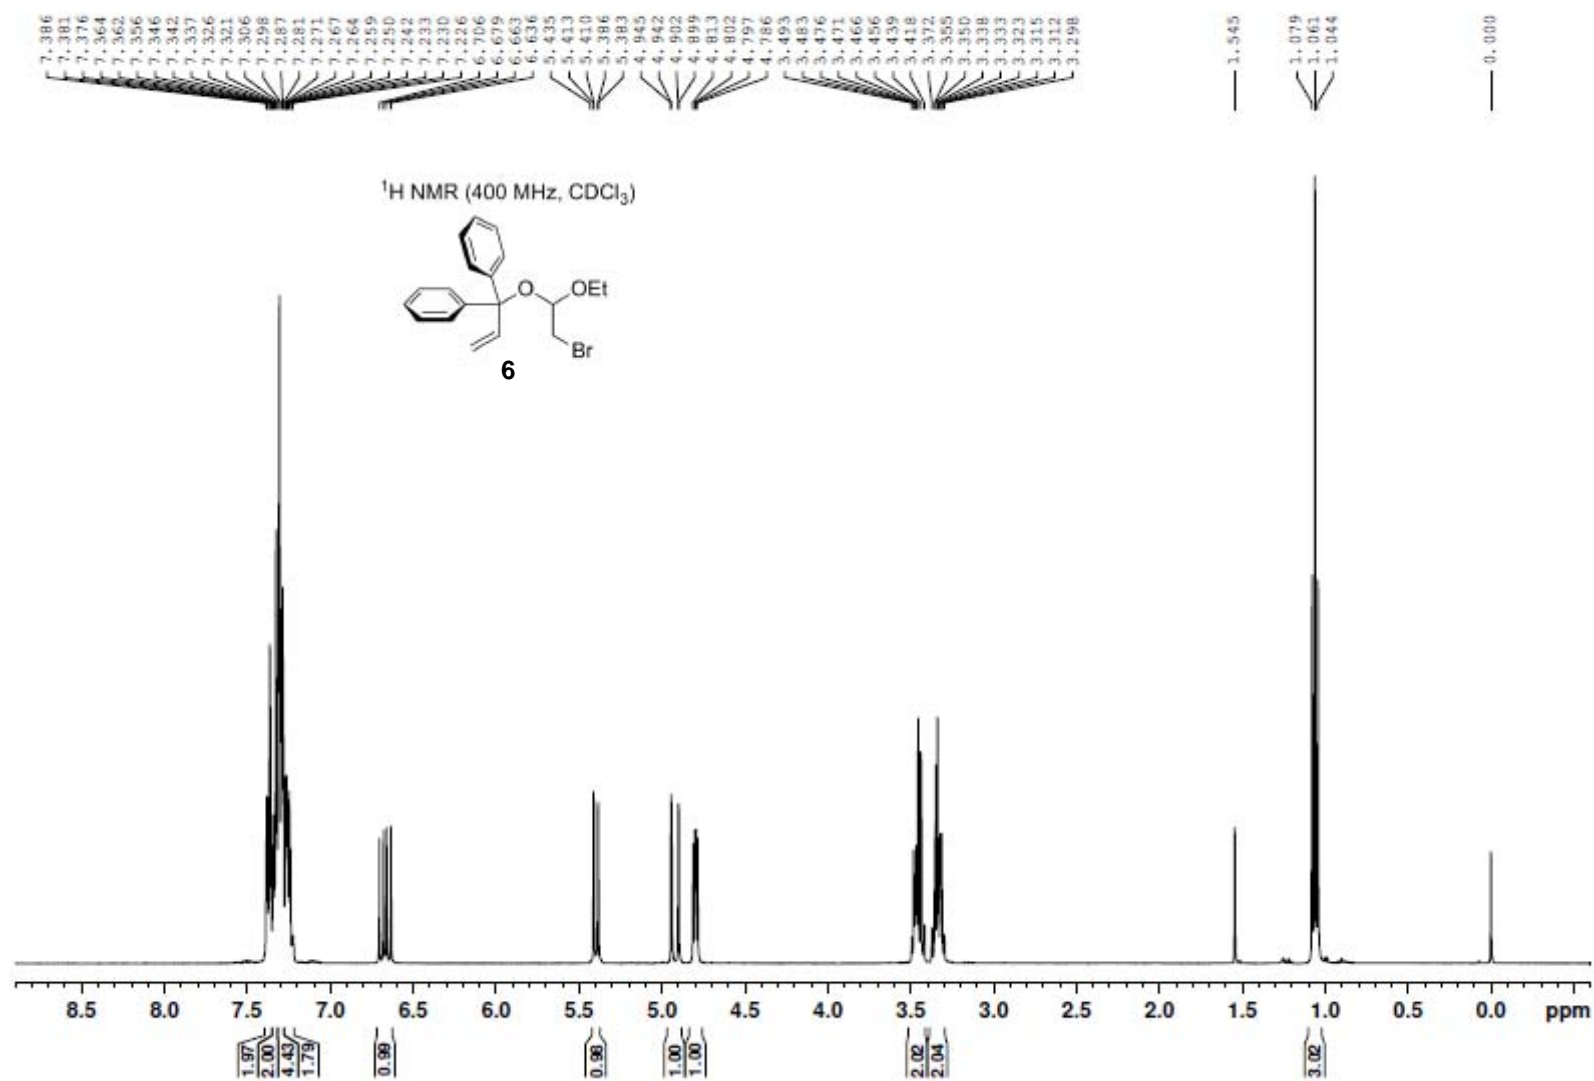

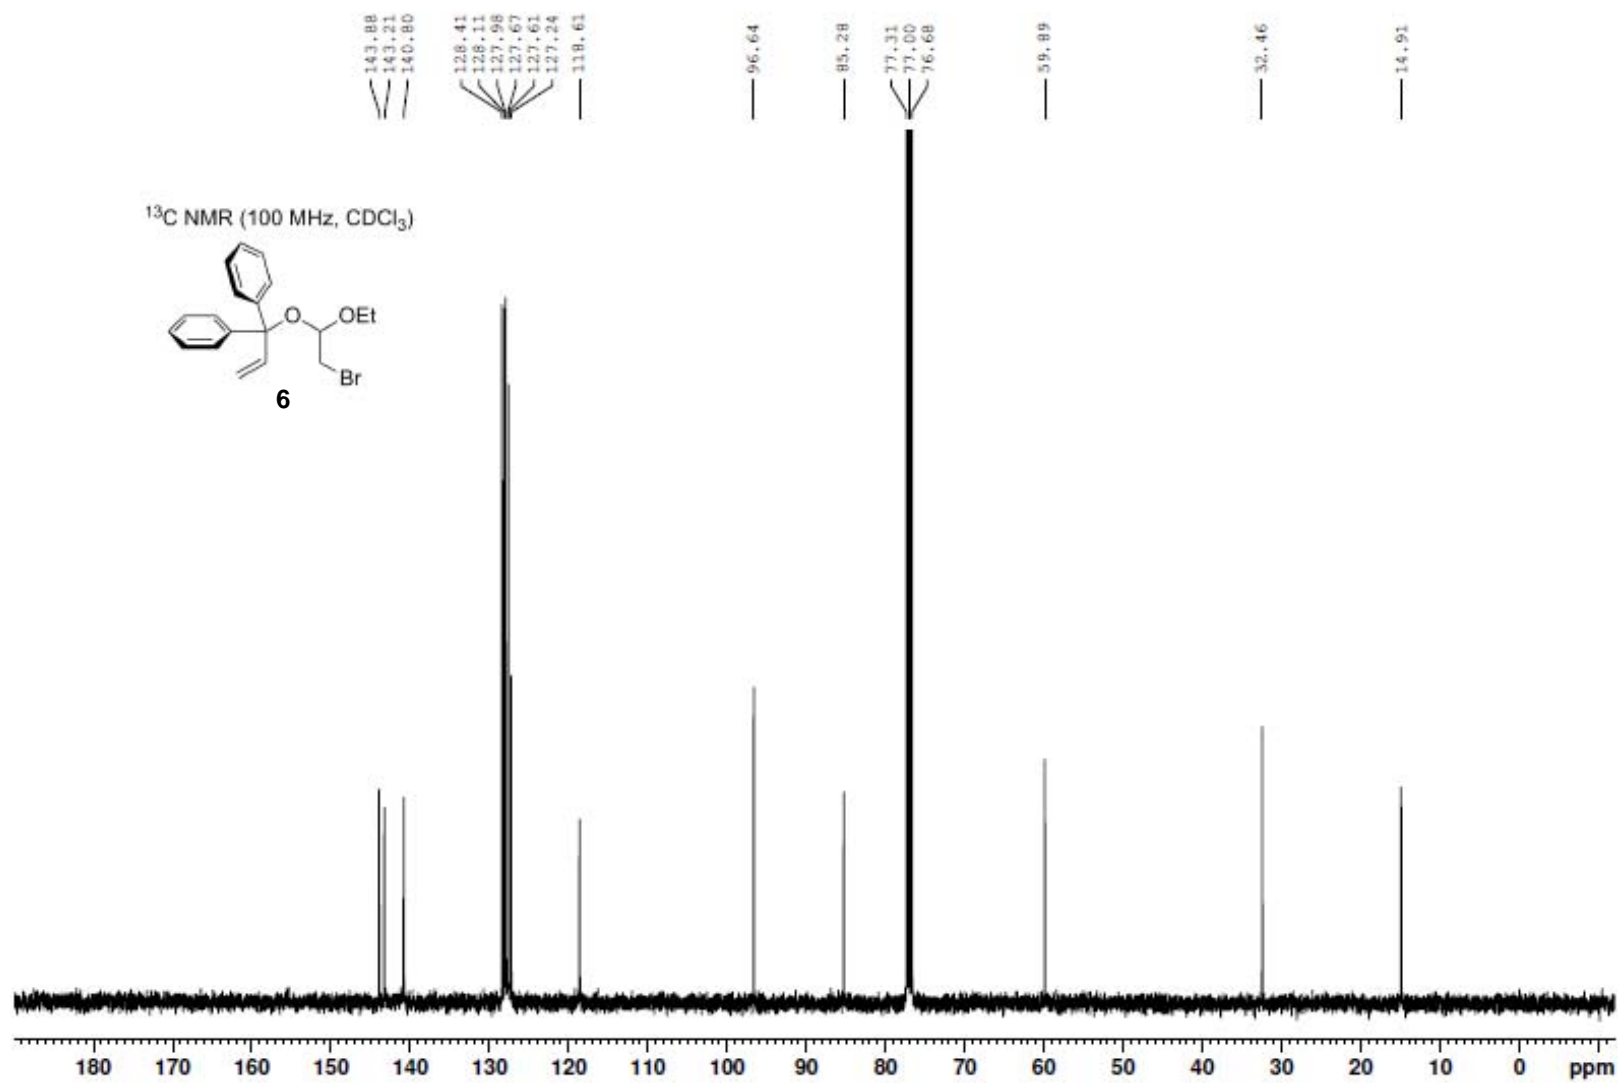

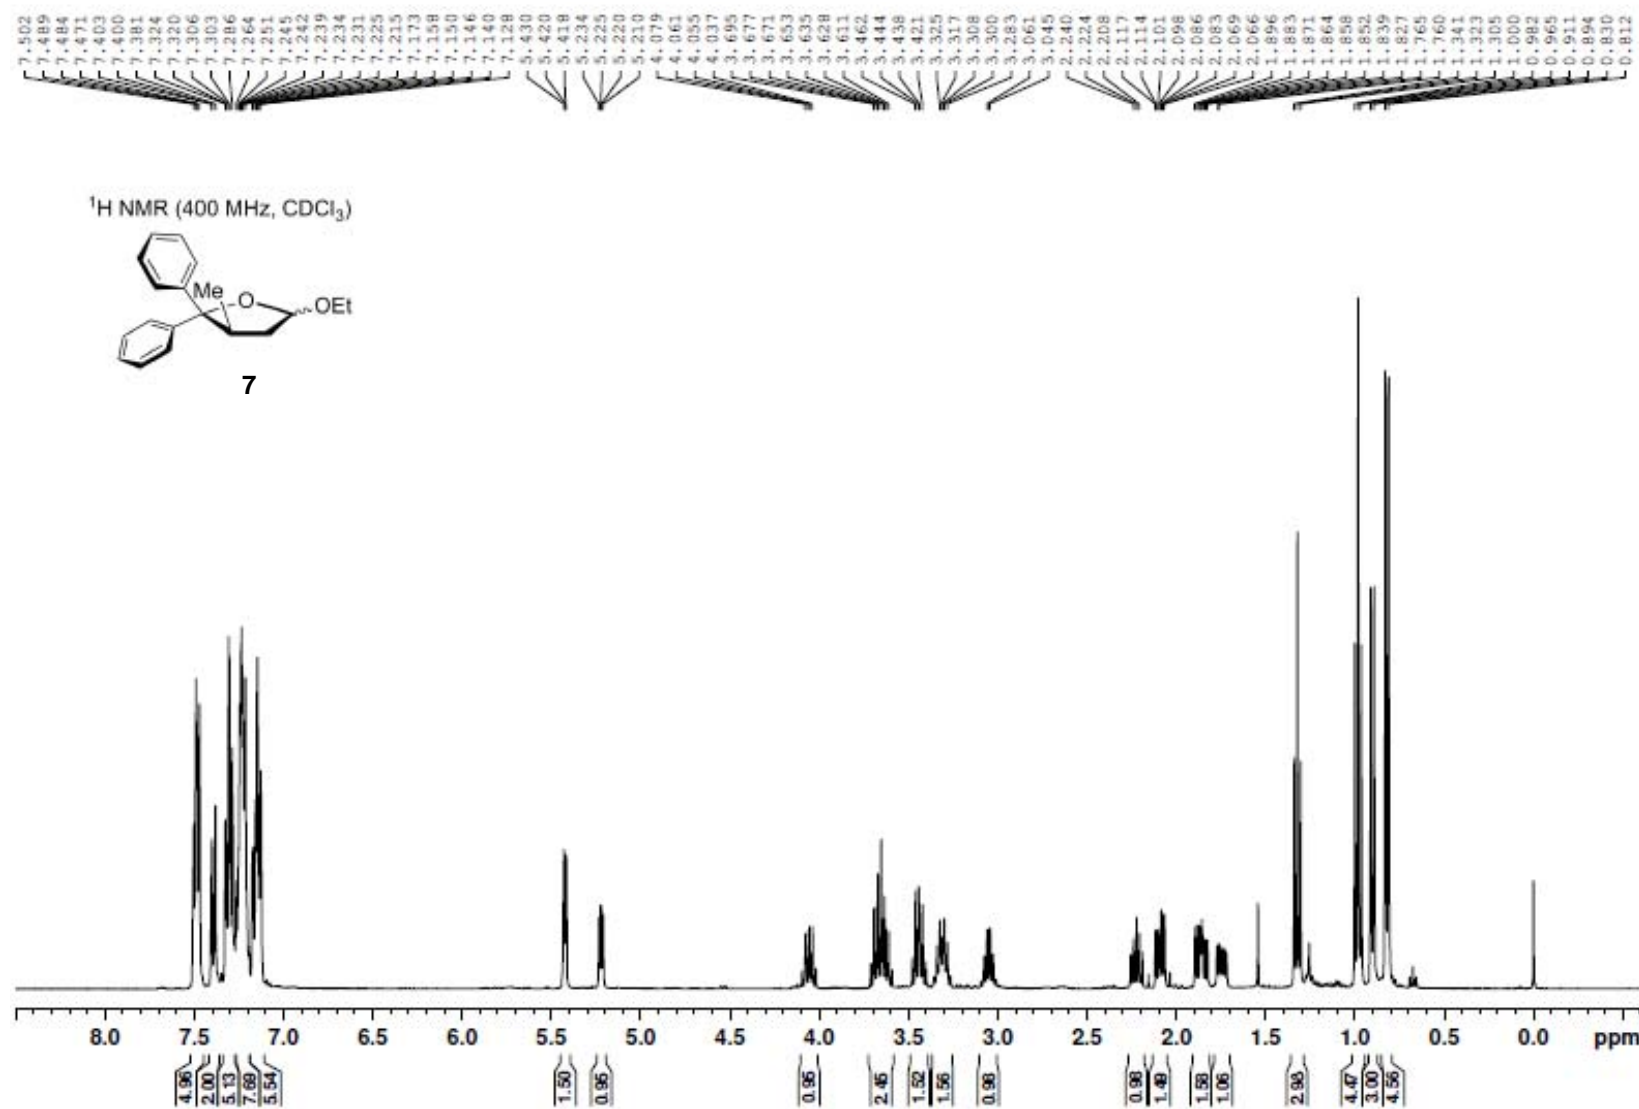

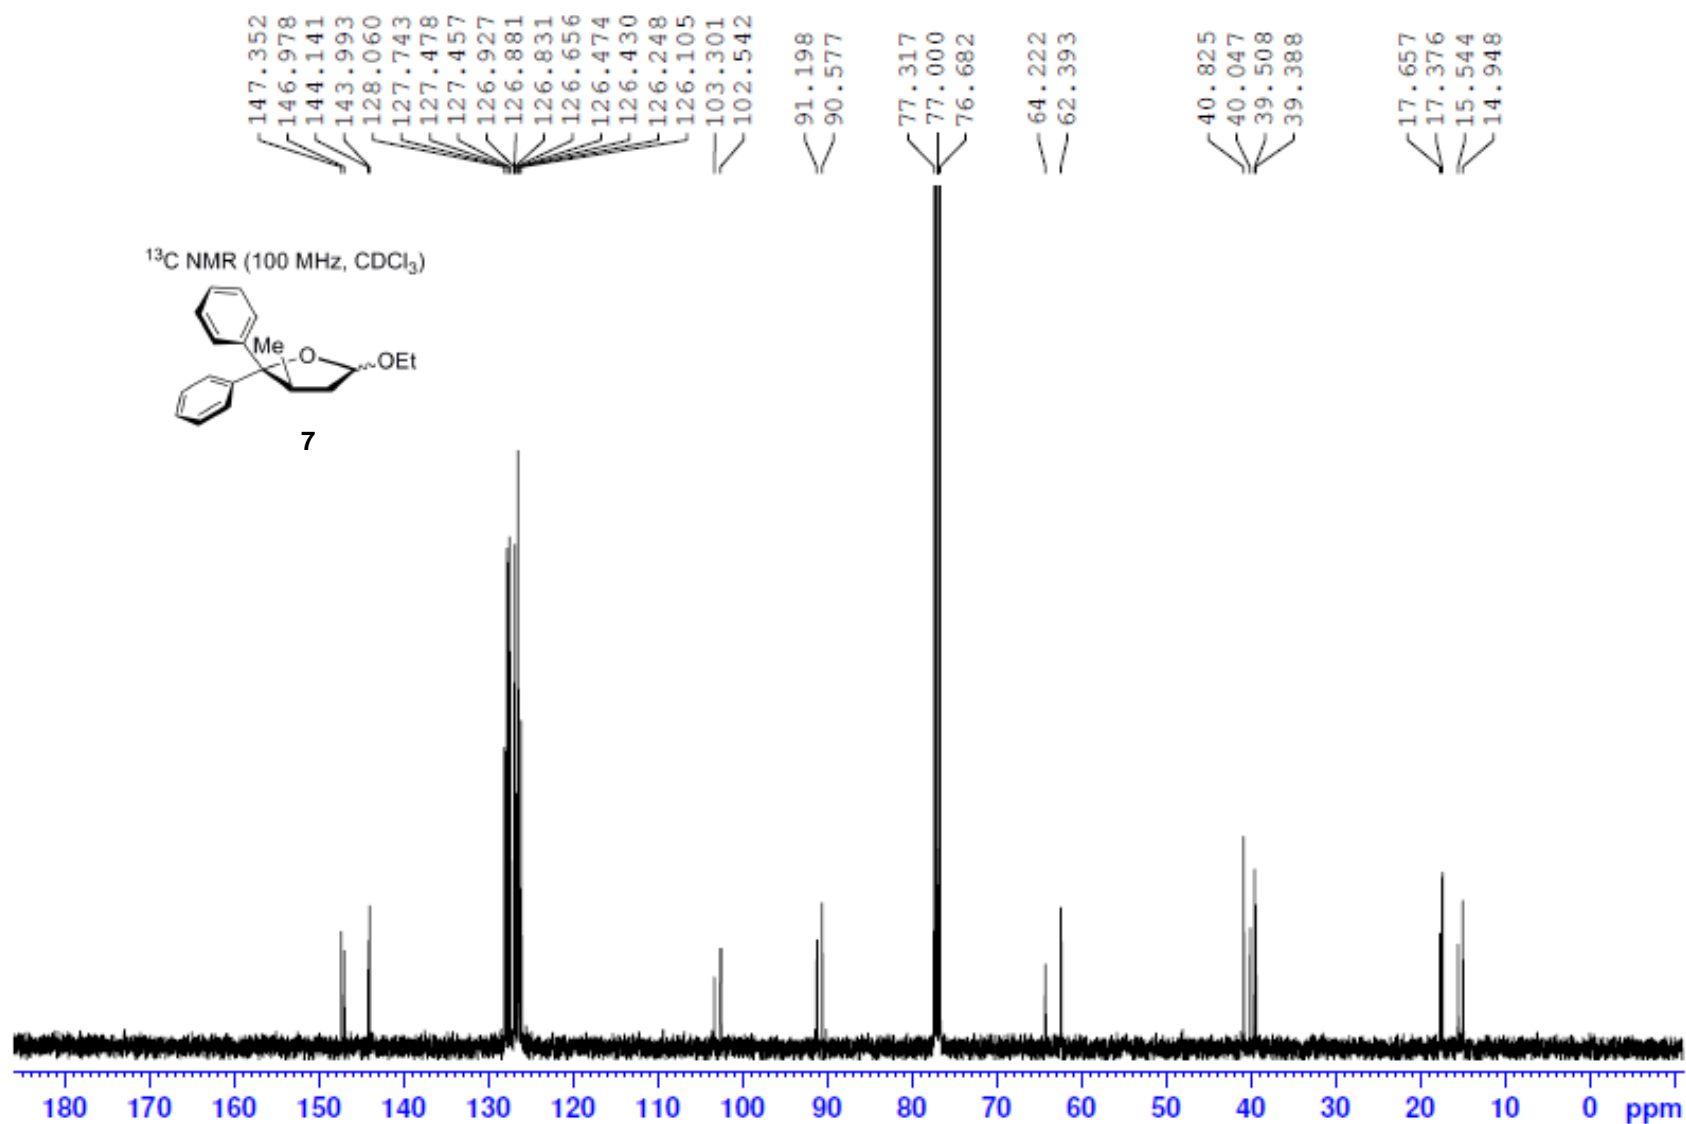



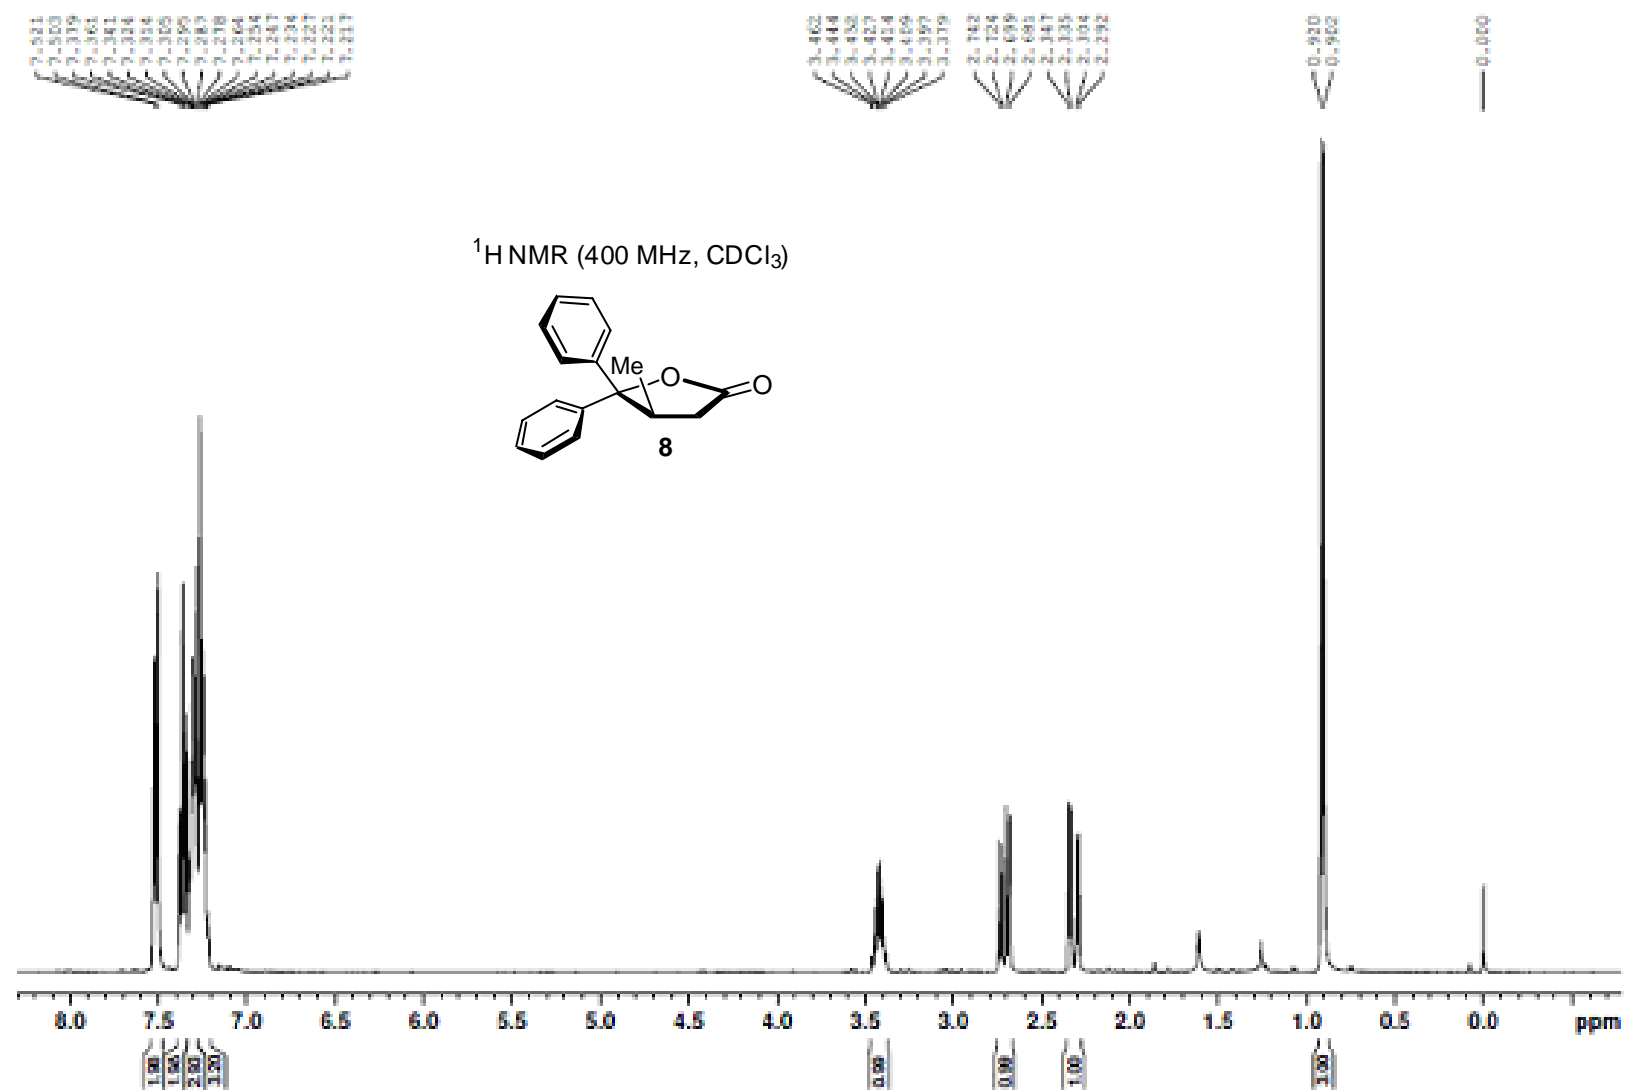

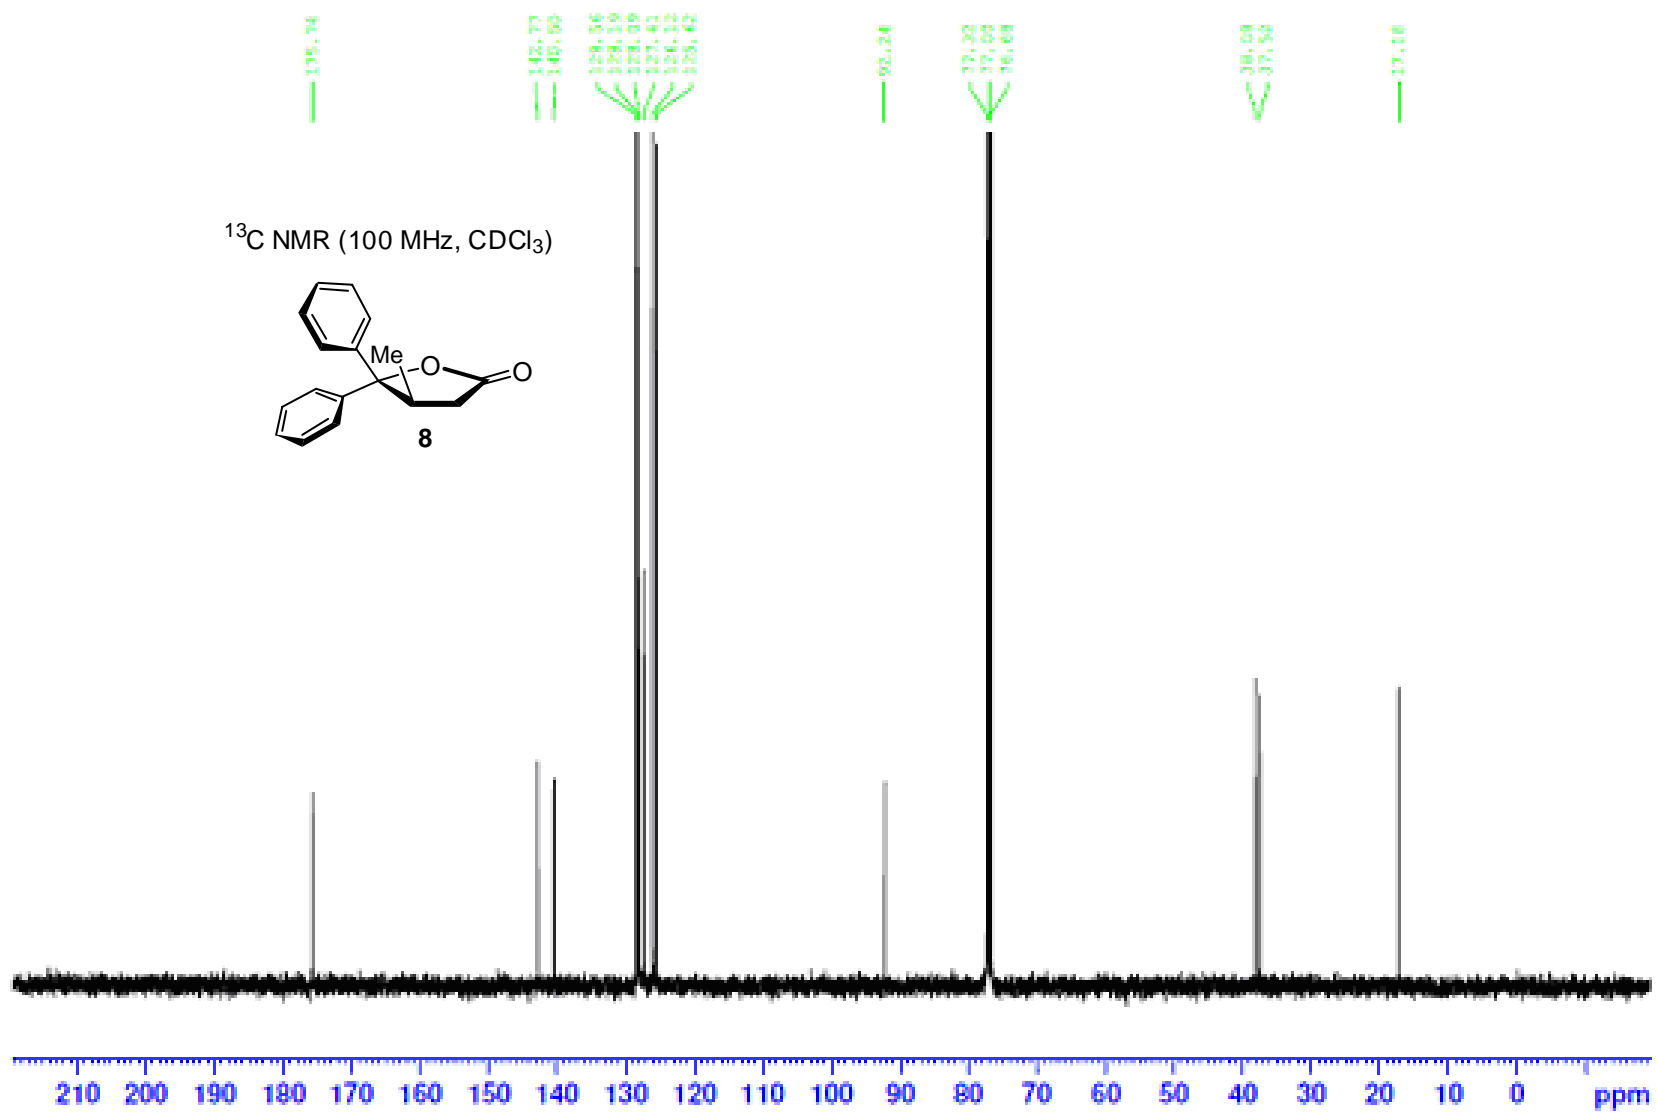

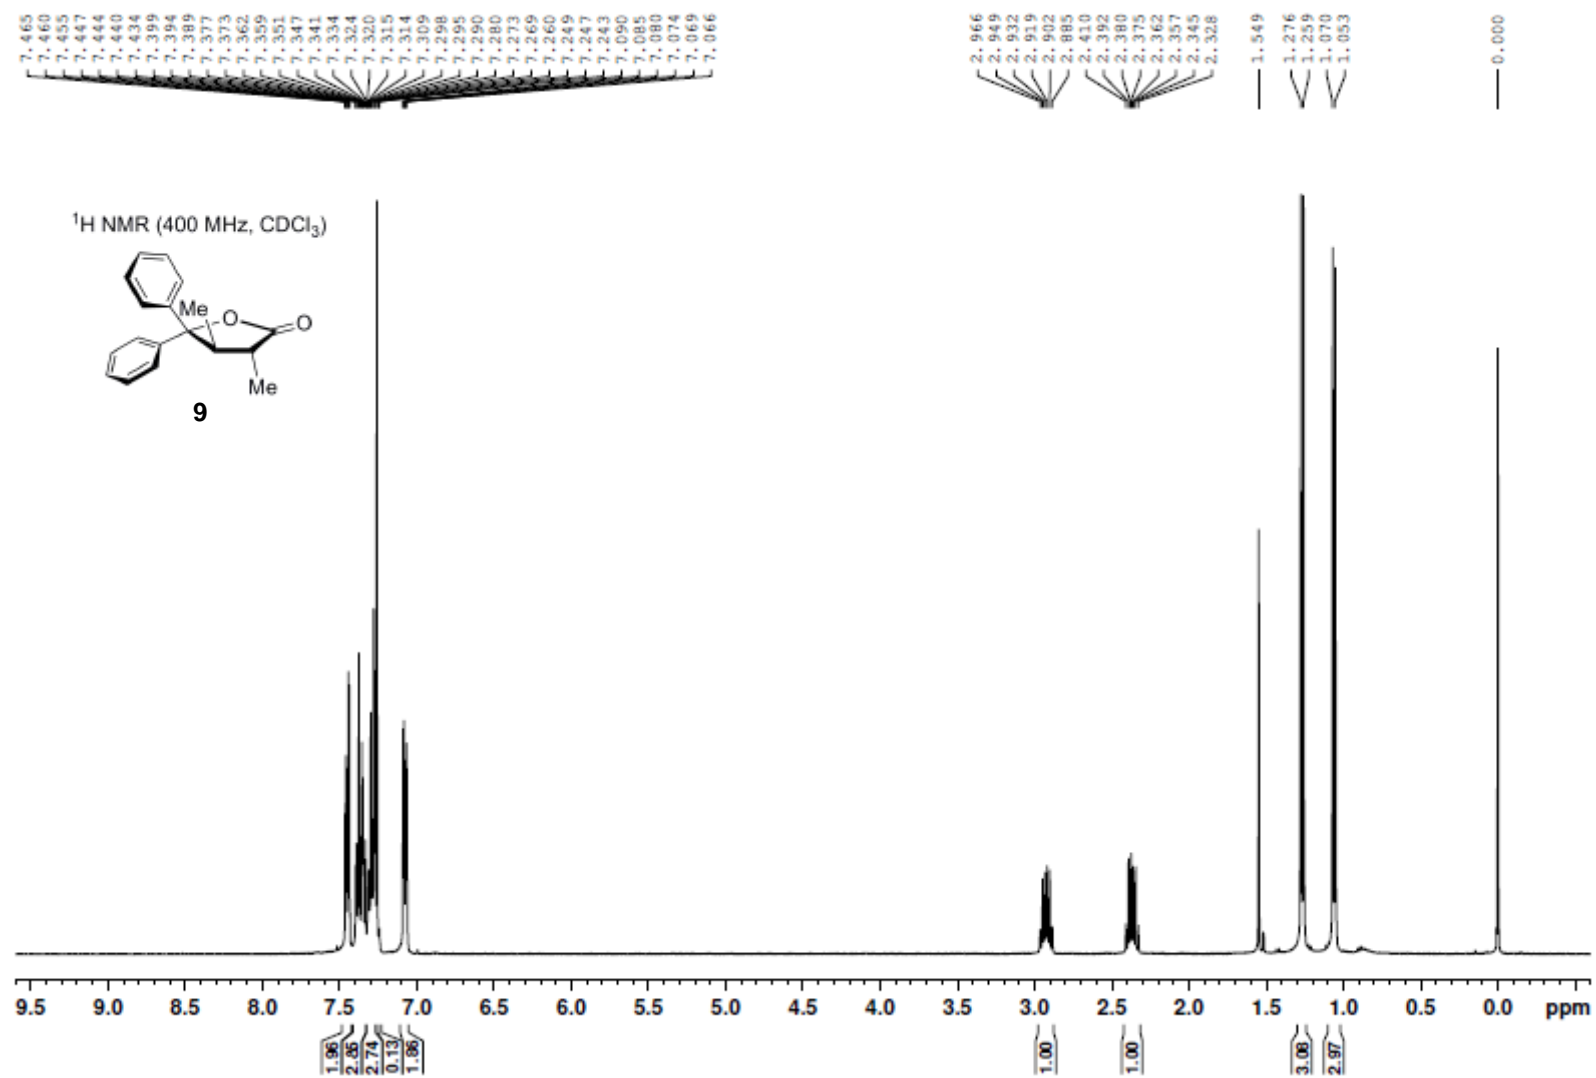

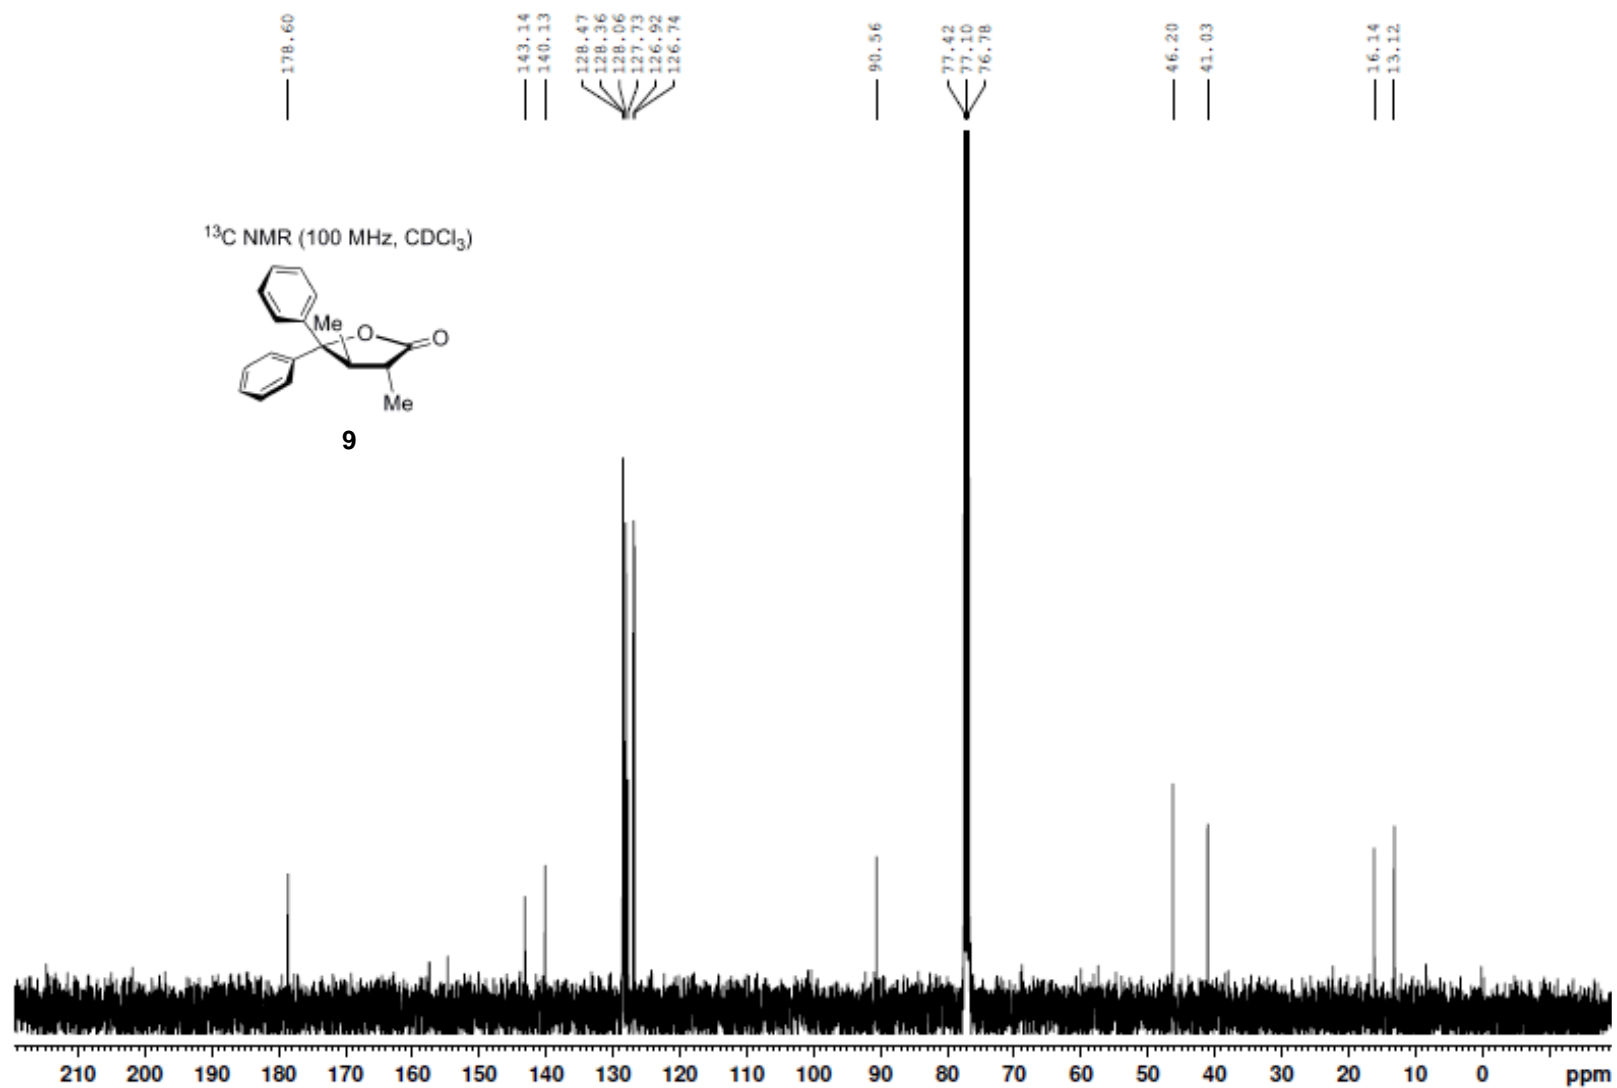

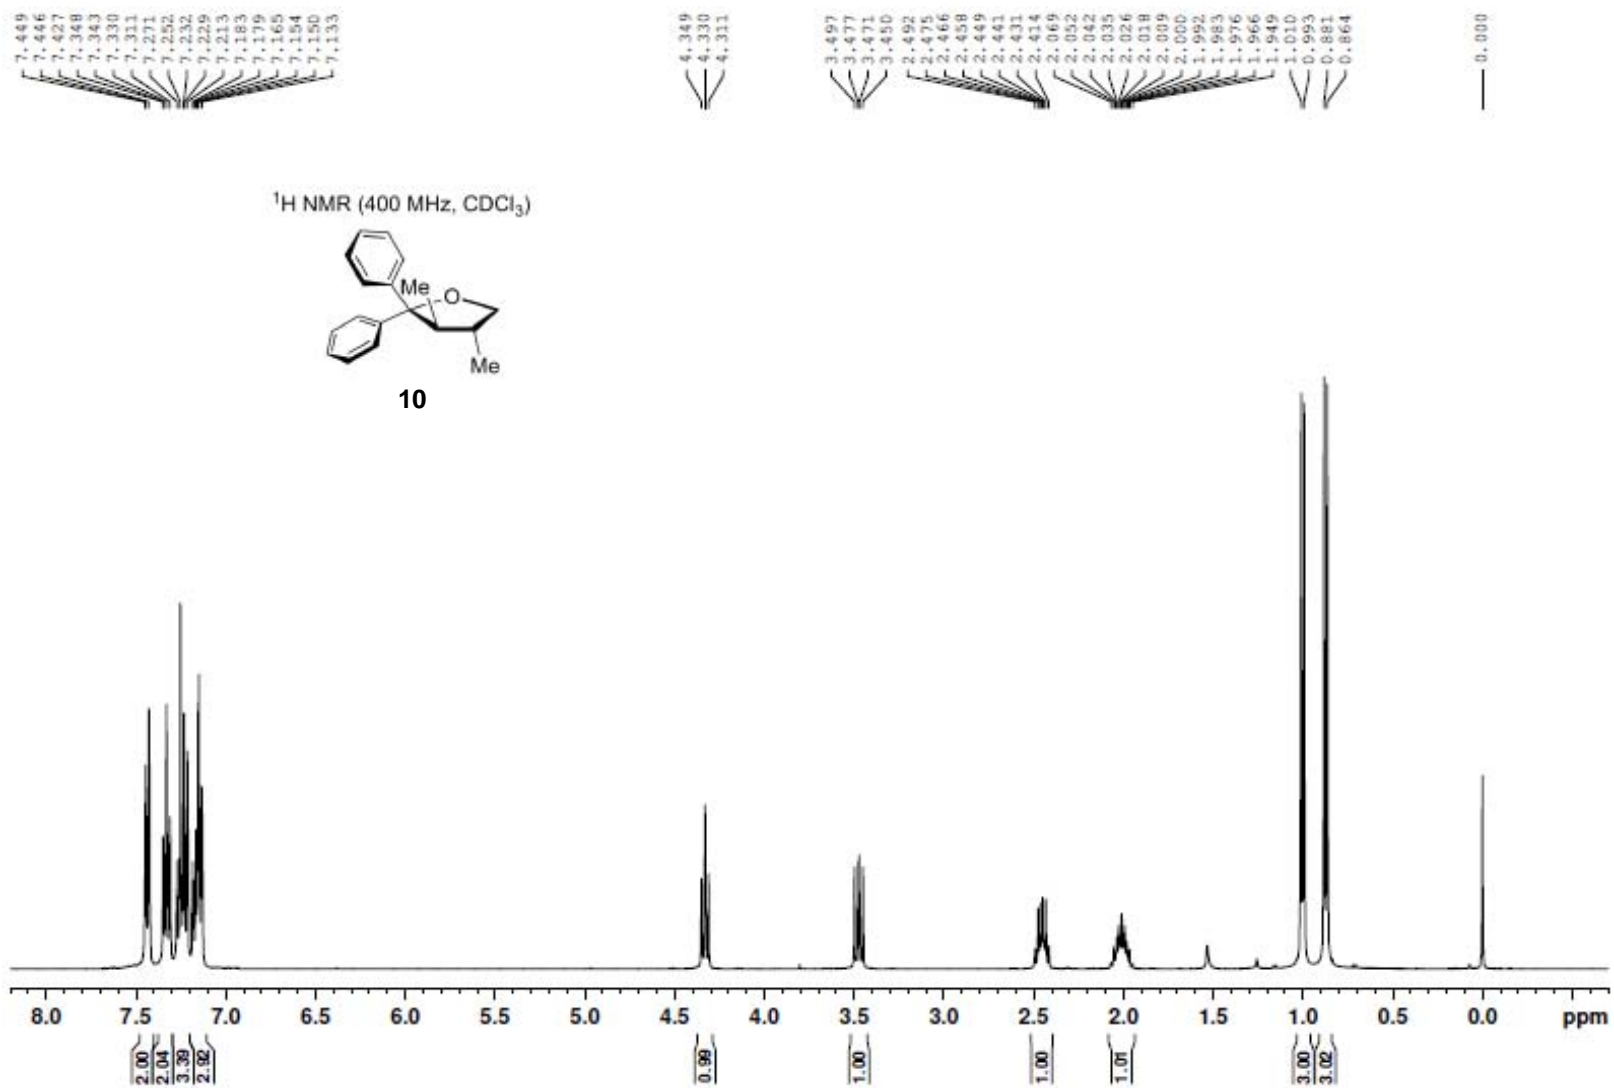

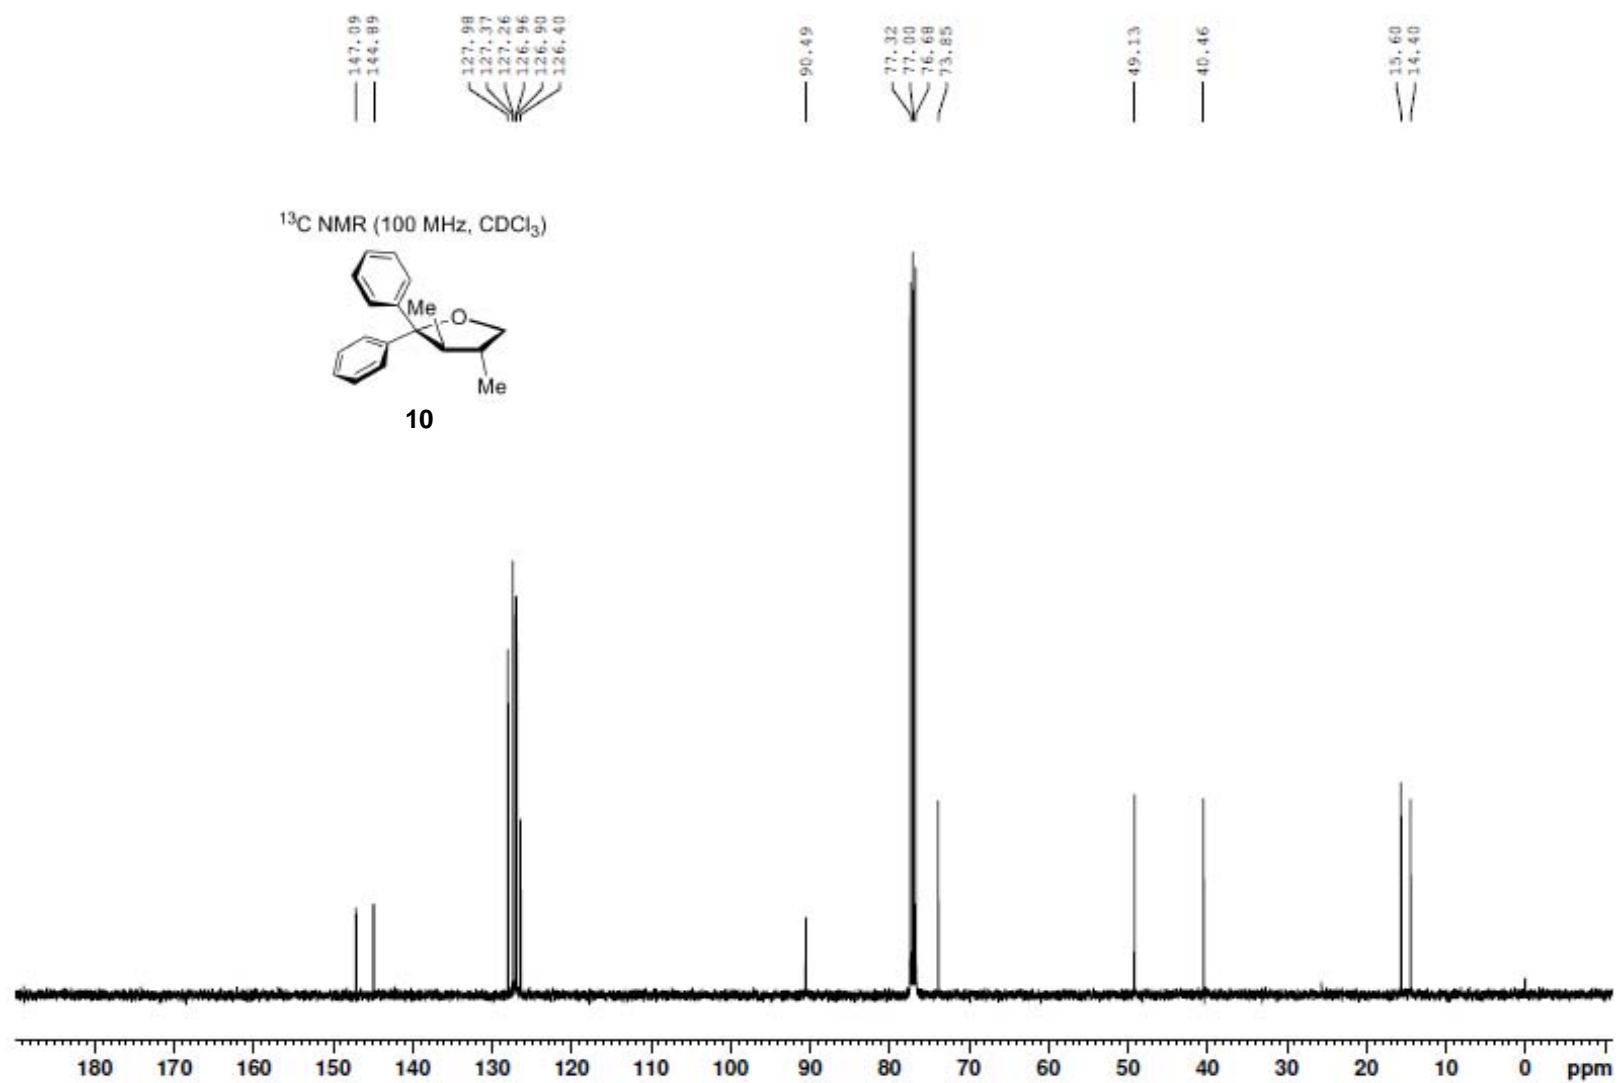

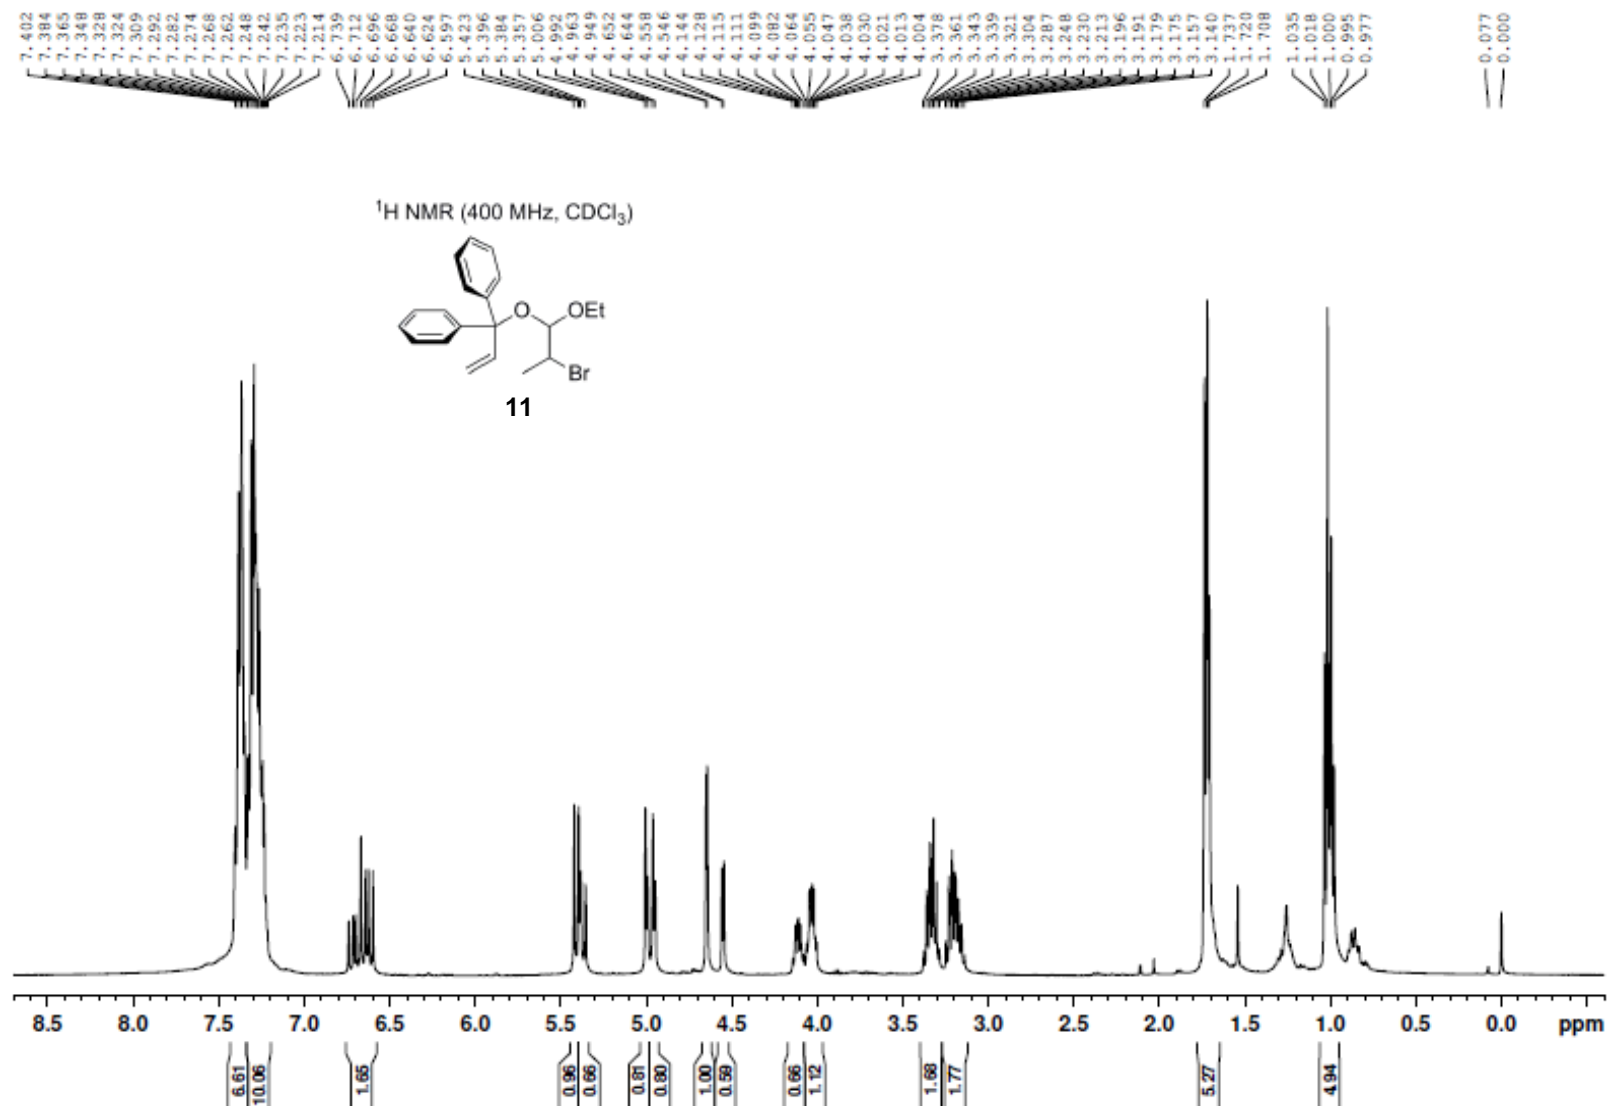

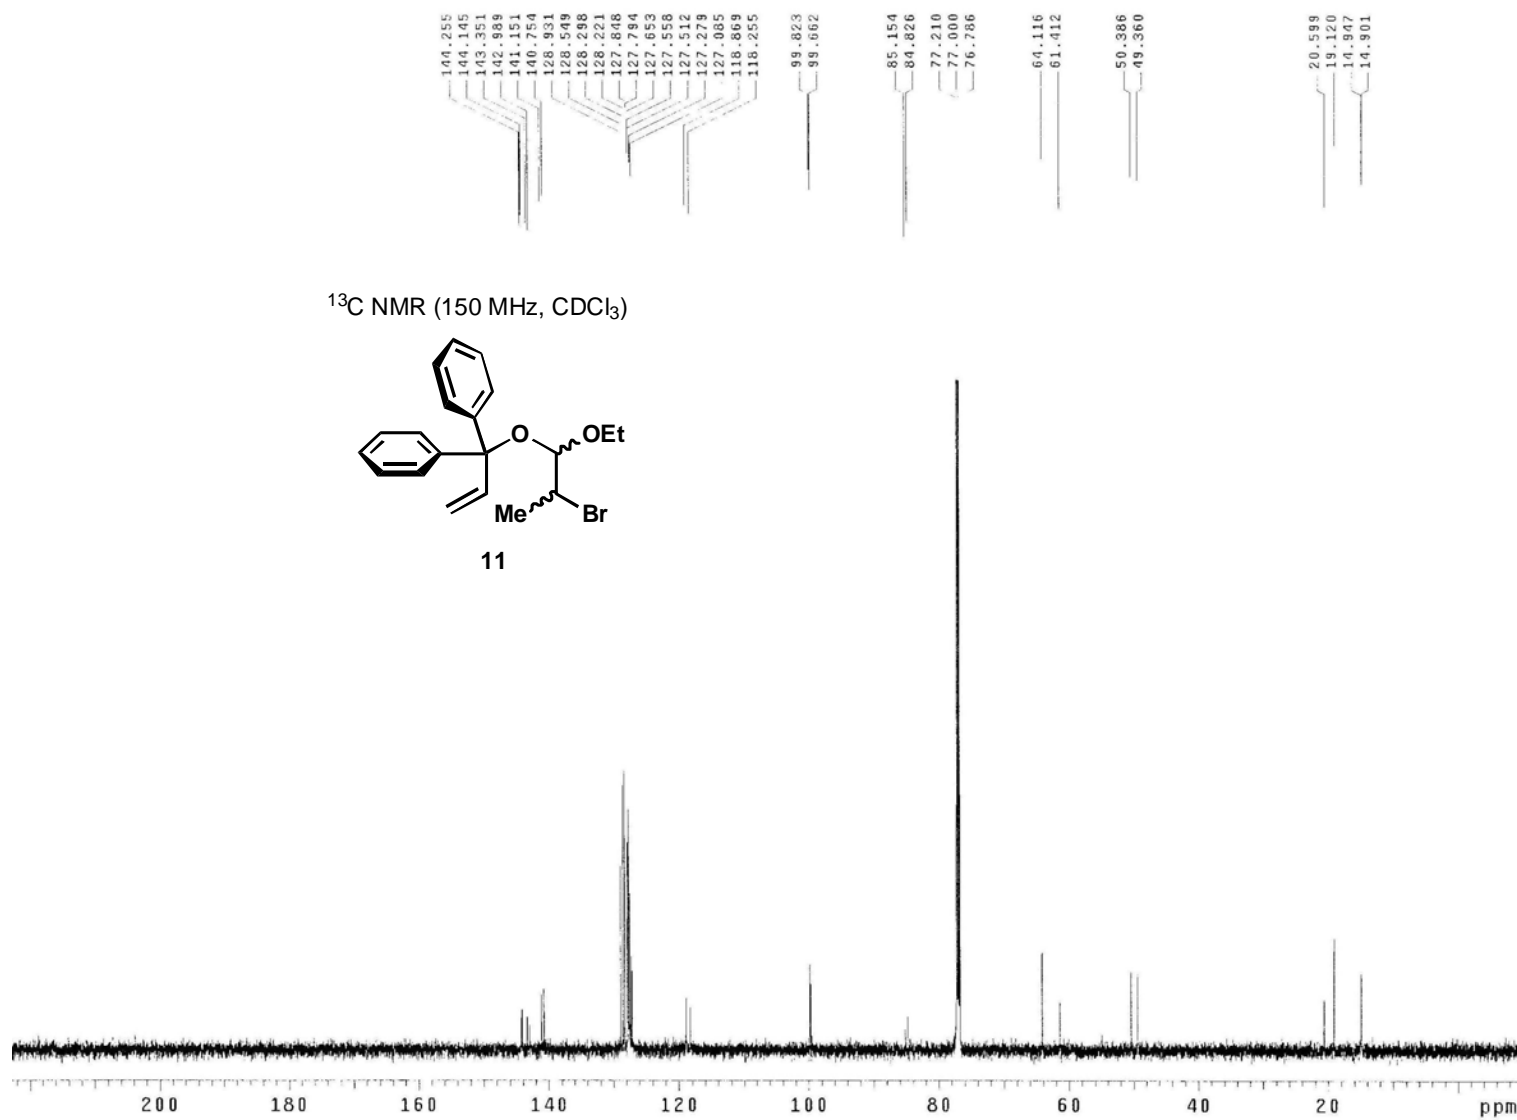



C:\Xcalibur\data\yanchangsong120224-01

2012-4-24 14:37:03

RT: 15.27 - 15.97

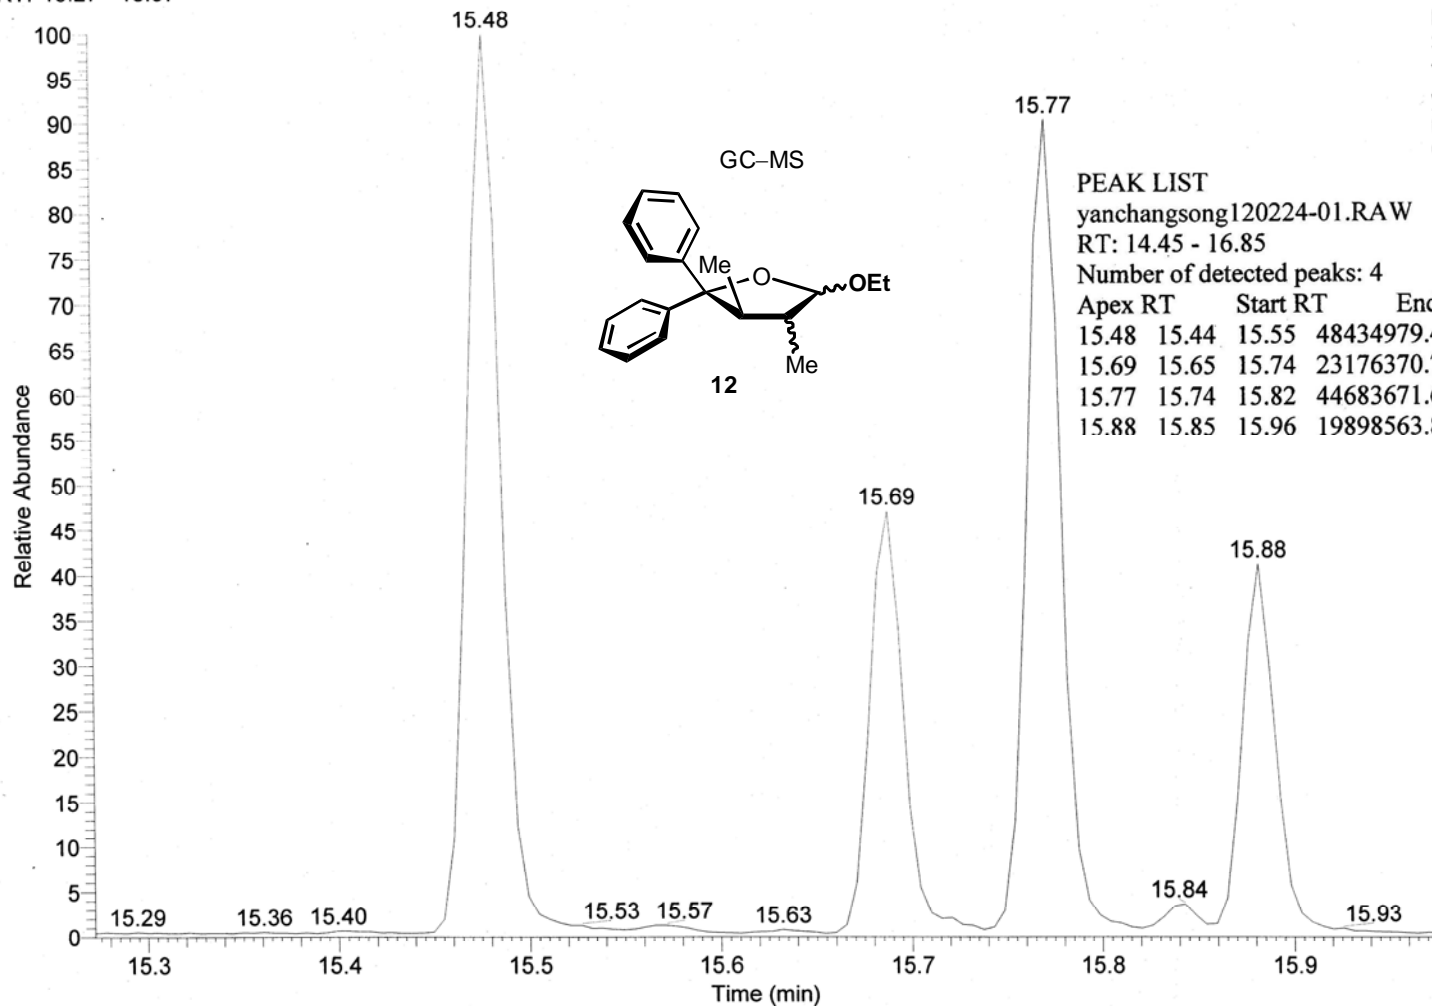

NL:  
3.99E7  
TIC F: MS  
yanchangso  
ng120224-  
01

PEAK LIST

yanchangsong120224-01.RAW

RT: 14.45 - 16.85

Number of detected peaks: 4

| Apex RT | Start RT | End RT | Area         | %Area | Height       | %Height |
|---------|----------|--------|--------------|-------|--------------|---------|
| 15.48   | 15.44    | 15.55  | 48434979.437 | 35.56 | 39708728.162 | 35.93   |
| 15.69   | 15.65    | 15.74  | 23176370.739 | 17.02 | 18627322.155 | 16.85   |
| 15.77   | 15.74    | 15.82  | 44683671.689 | 32.81 | 35897027.073 | 32.48   |
| 15.88   | 15.85    | 15.96  | 19898563.842 | 14.61 | 16287263.916 | 14.74   |

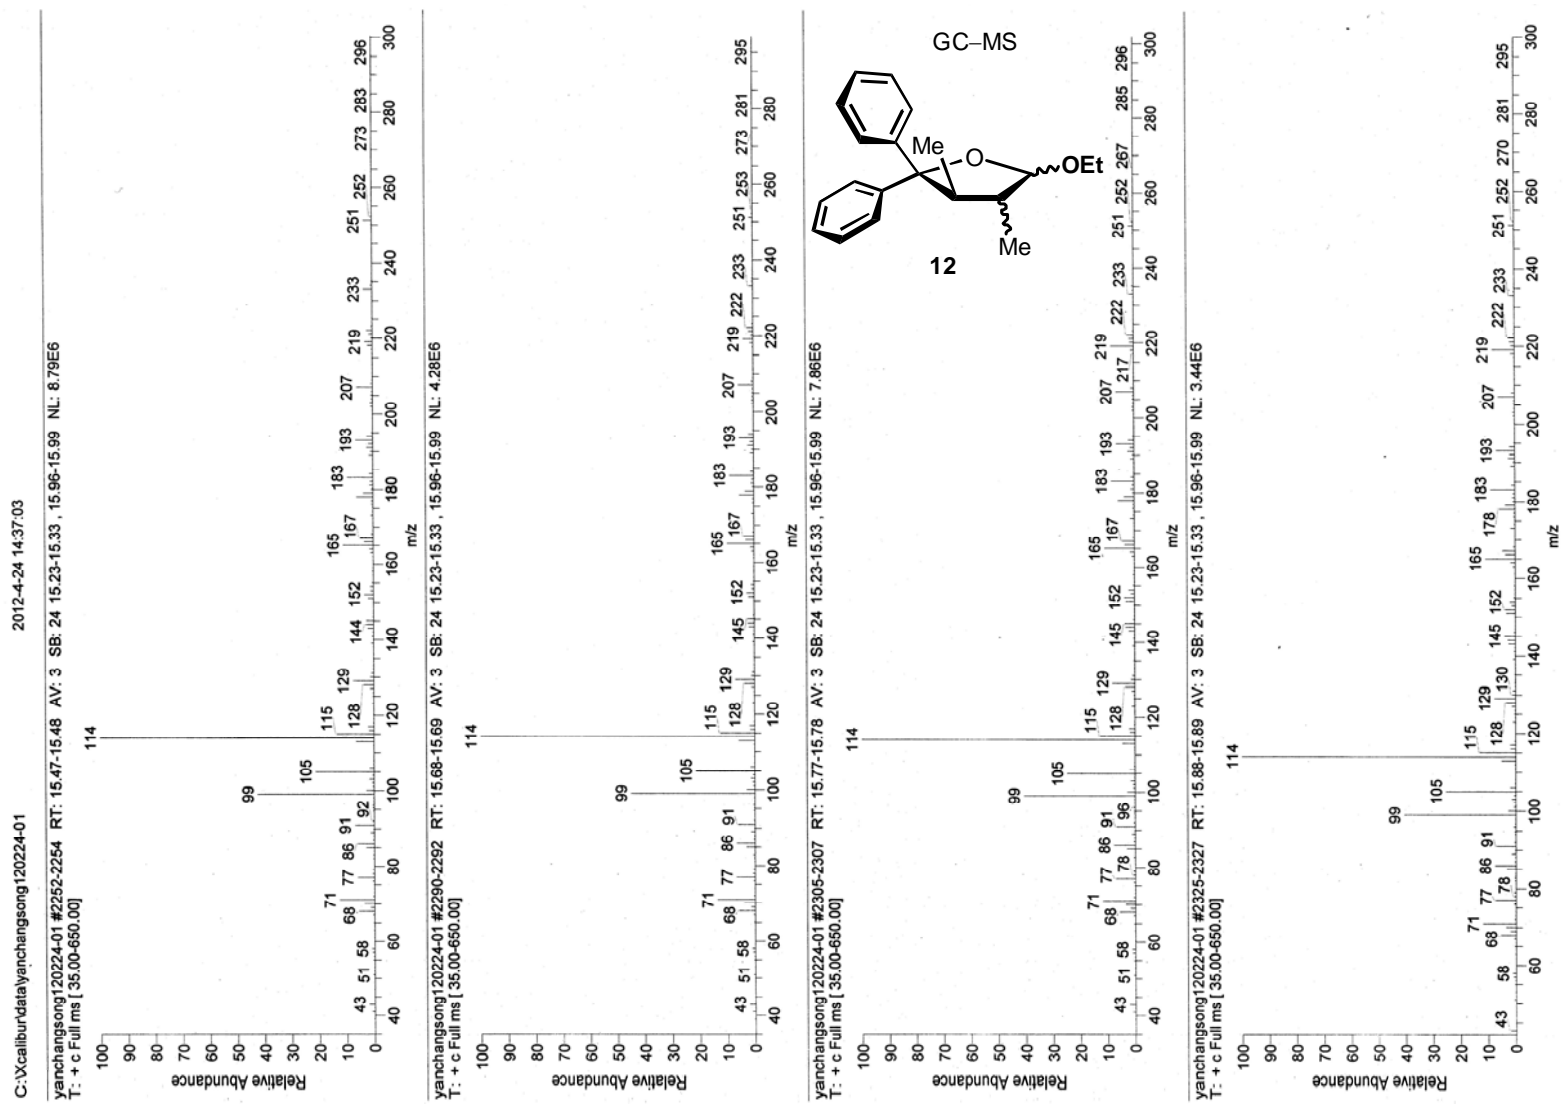

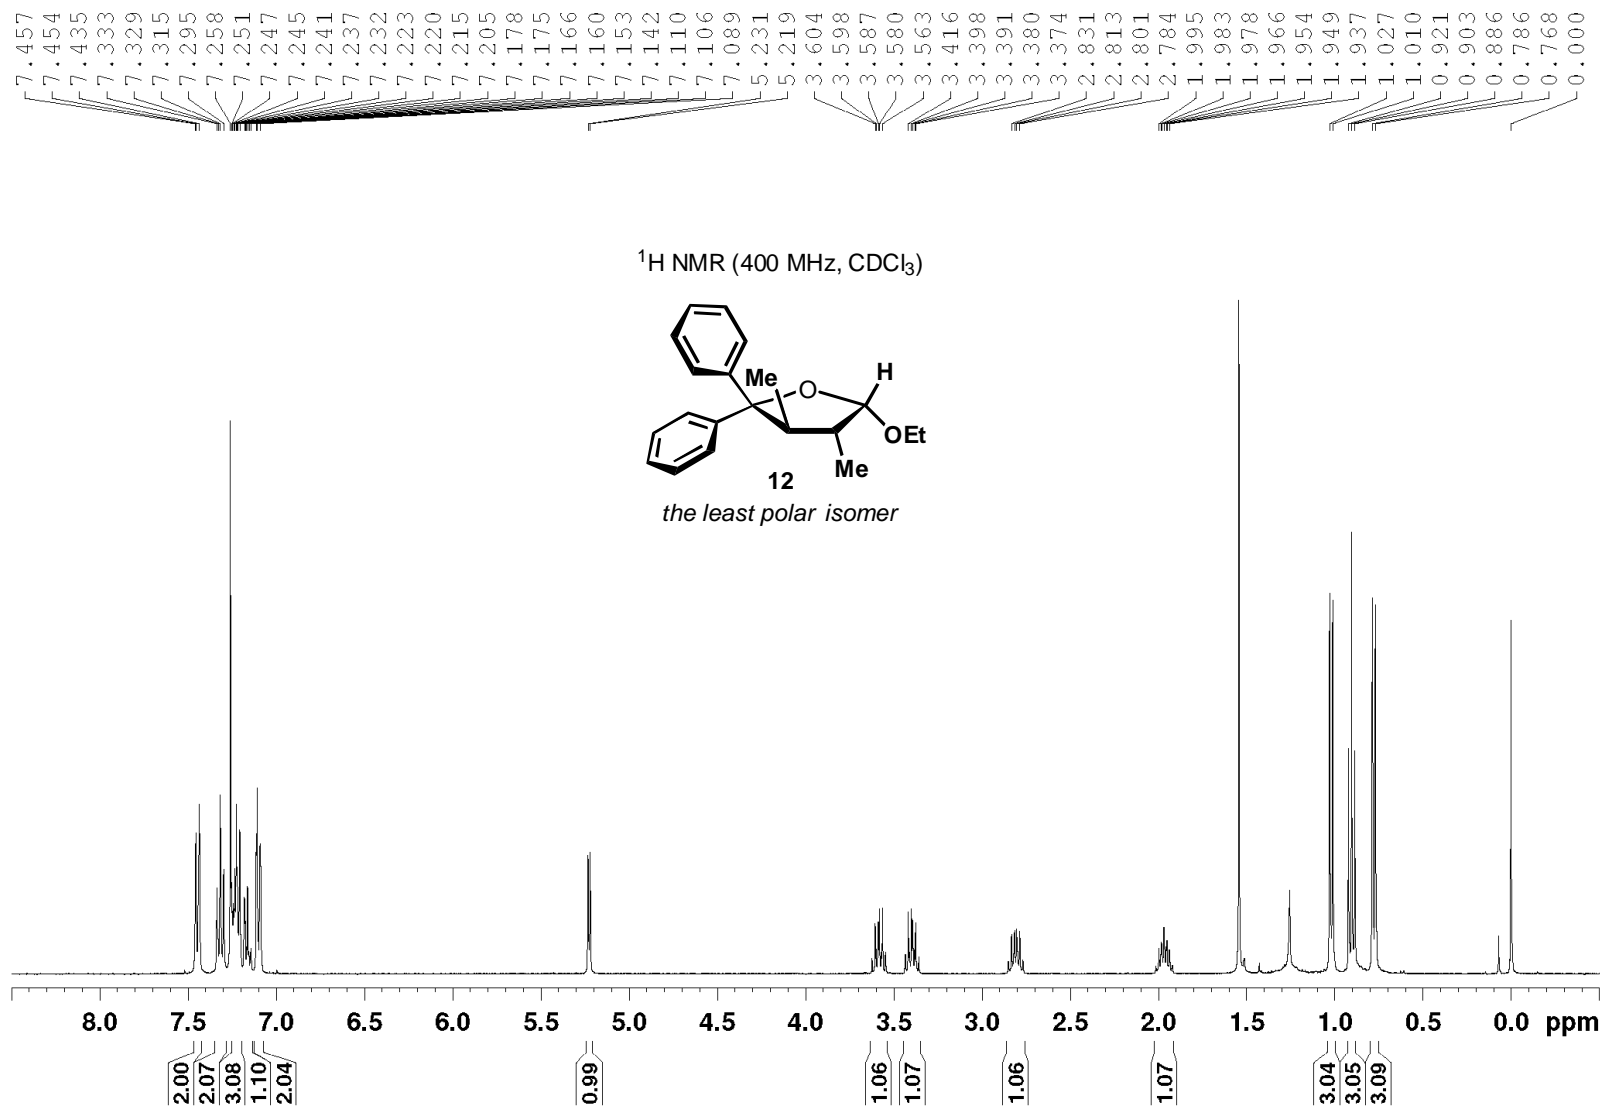

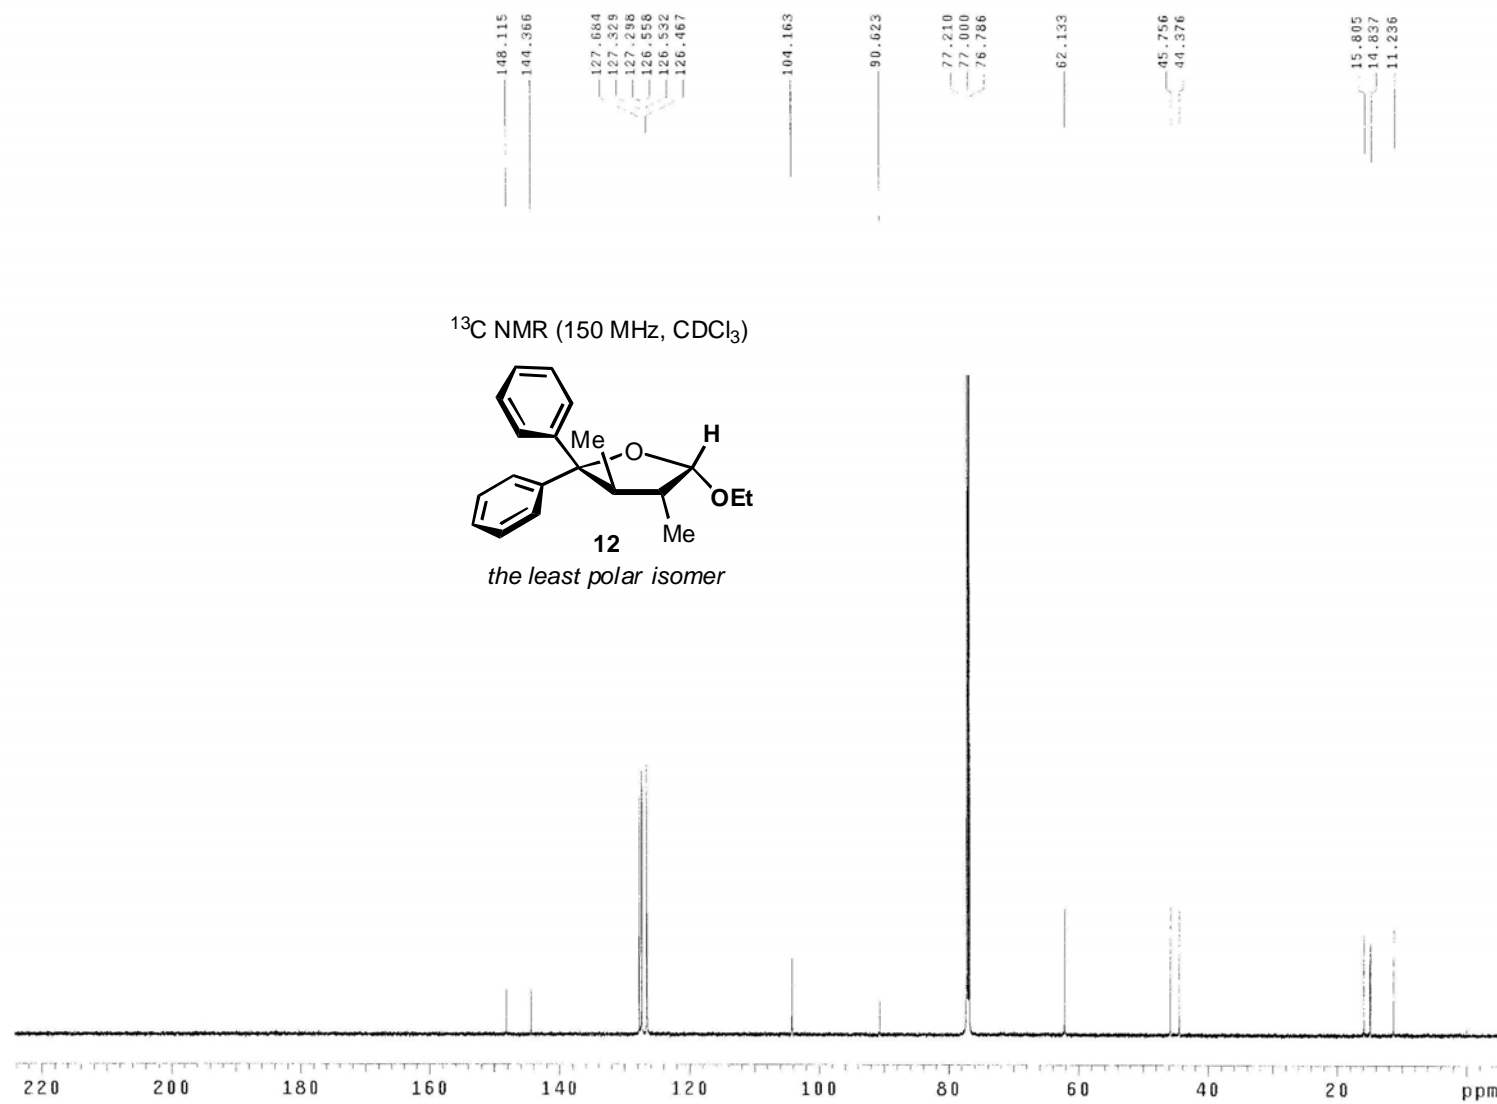

$^1\text{H} - ^1\text{H}$  COSY of  
 the least polar isomer  
 12

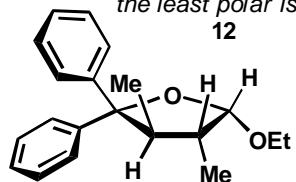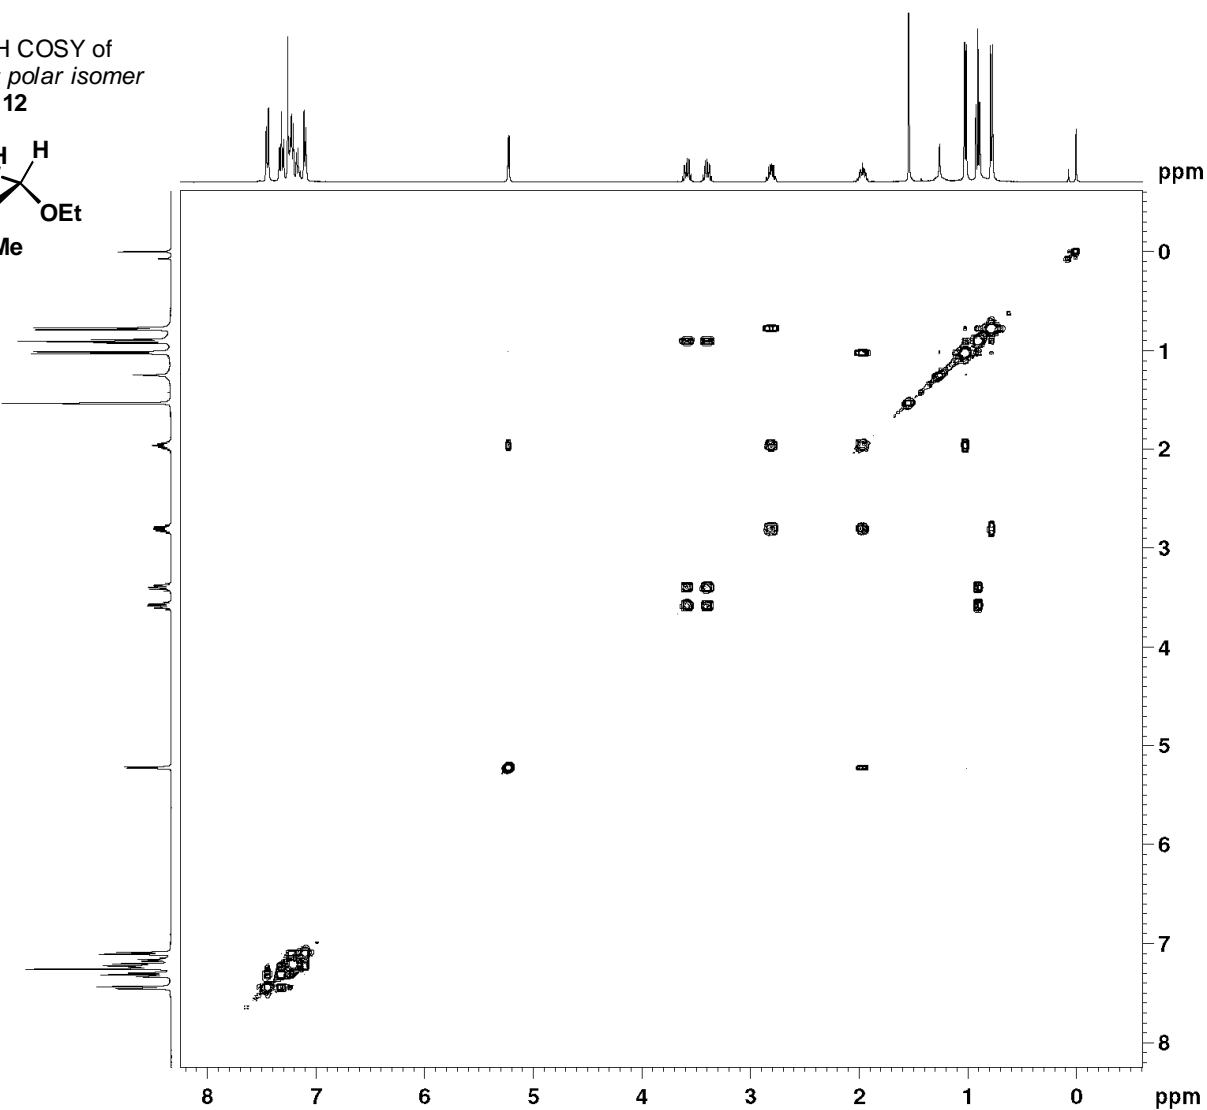

```

NAME      rjg2012-1016-1-benji dai jia jicou
EXPNO    1
PROCNO   1
Date_    20121015
Time     10.10
INSTRUM  spect
PROBHD   5 mm PABBO BB-
PULPROG  cosyprgf
TD       32768
SOLVENT  CDCl3
NS       1
DS       0
SWH      3546.099 Hz
FIDRES   1.731494 Hz
AQ       0.2988180 sec
RG       162
DN       141.000 usec
DE       6.50 usec
TE       296.2 K
D0       0.0000300 sec
D1       1.38981700 sec
D13      0.00000400 sec
D16      0.00020000 sec
IM0      0.0002600 sec

===== CHANNEL f1 =====
NUC1     1H
P0       14.70 usec
P1       14.70 usec
PL1      -1.00 dB
PL1W     13.75590801 W
SFO1     400.1315341 MHz

===== GRADIENT CHANNEL =====
GR1      100.00 %
GPR1     1000.00 usec
F16      124
TD       124
SFO1     400.1315341 MHz
FIDRES   27.703901 Hz
SW       8.862 ppm
PUMODE   QF
SI       1024
SF       400.1300063 MHz
WDW      SINE
SFB      0
LB       0.00 Hz
GB       0
PC       1.40
SI       1024
MC2
SF       400.1300063 MHz
WDW      SINE
SFB      0
LB       0.00 Hz
GB       0
    
```

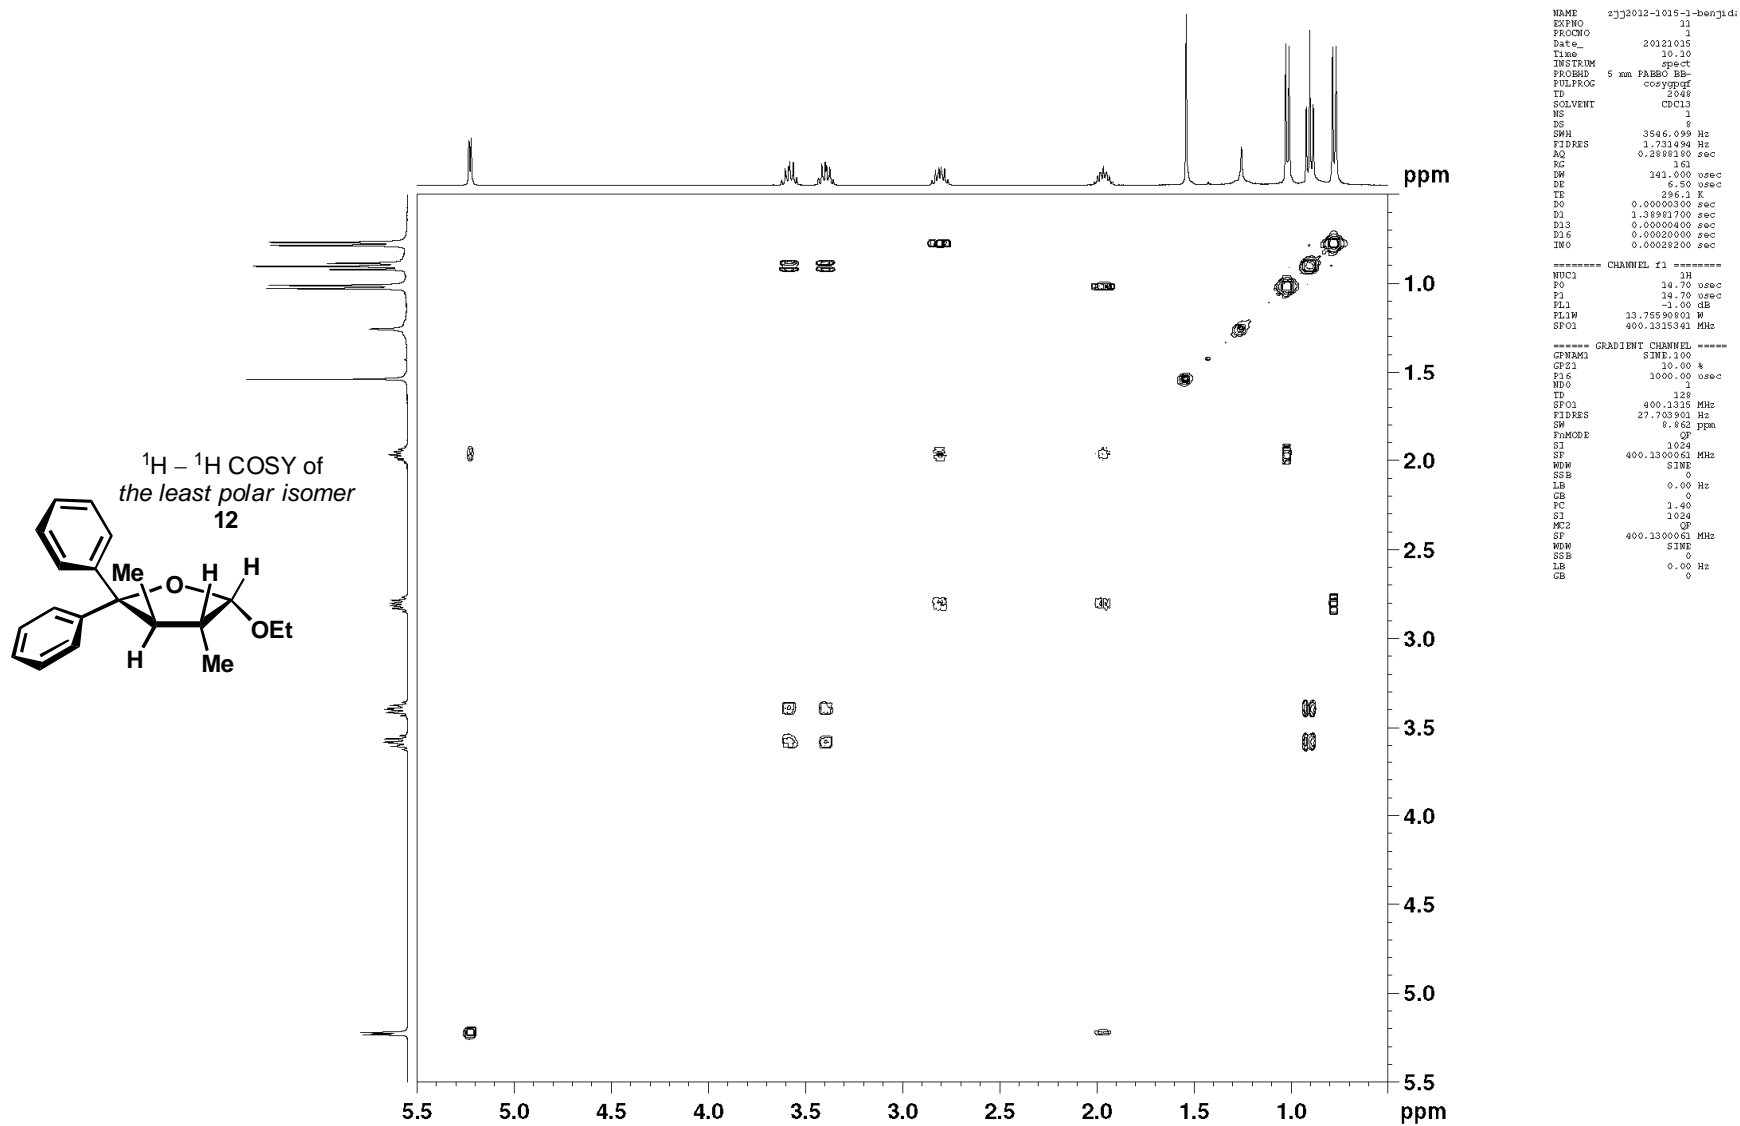

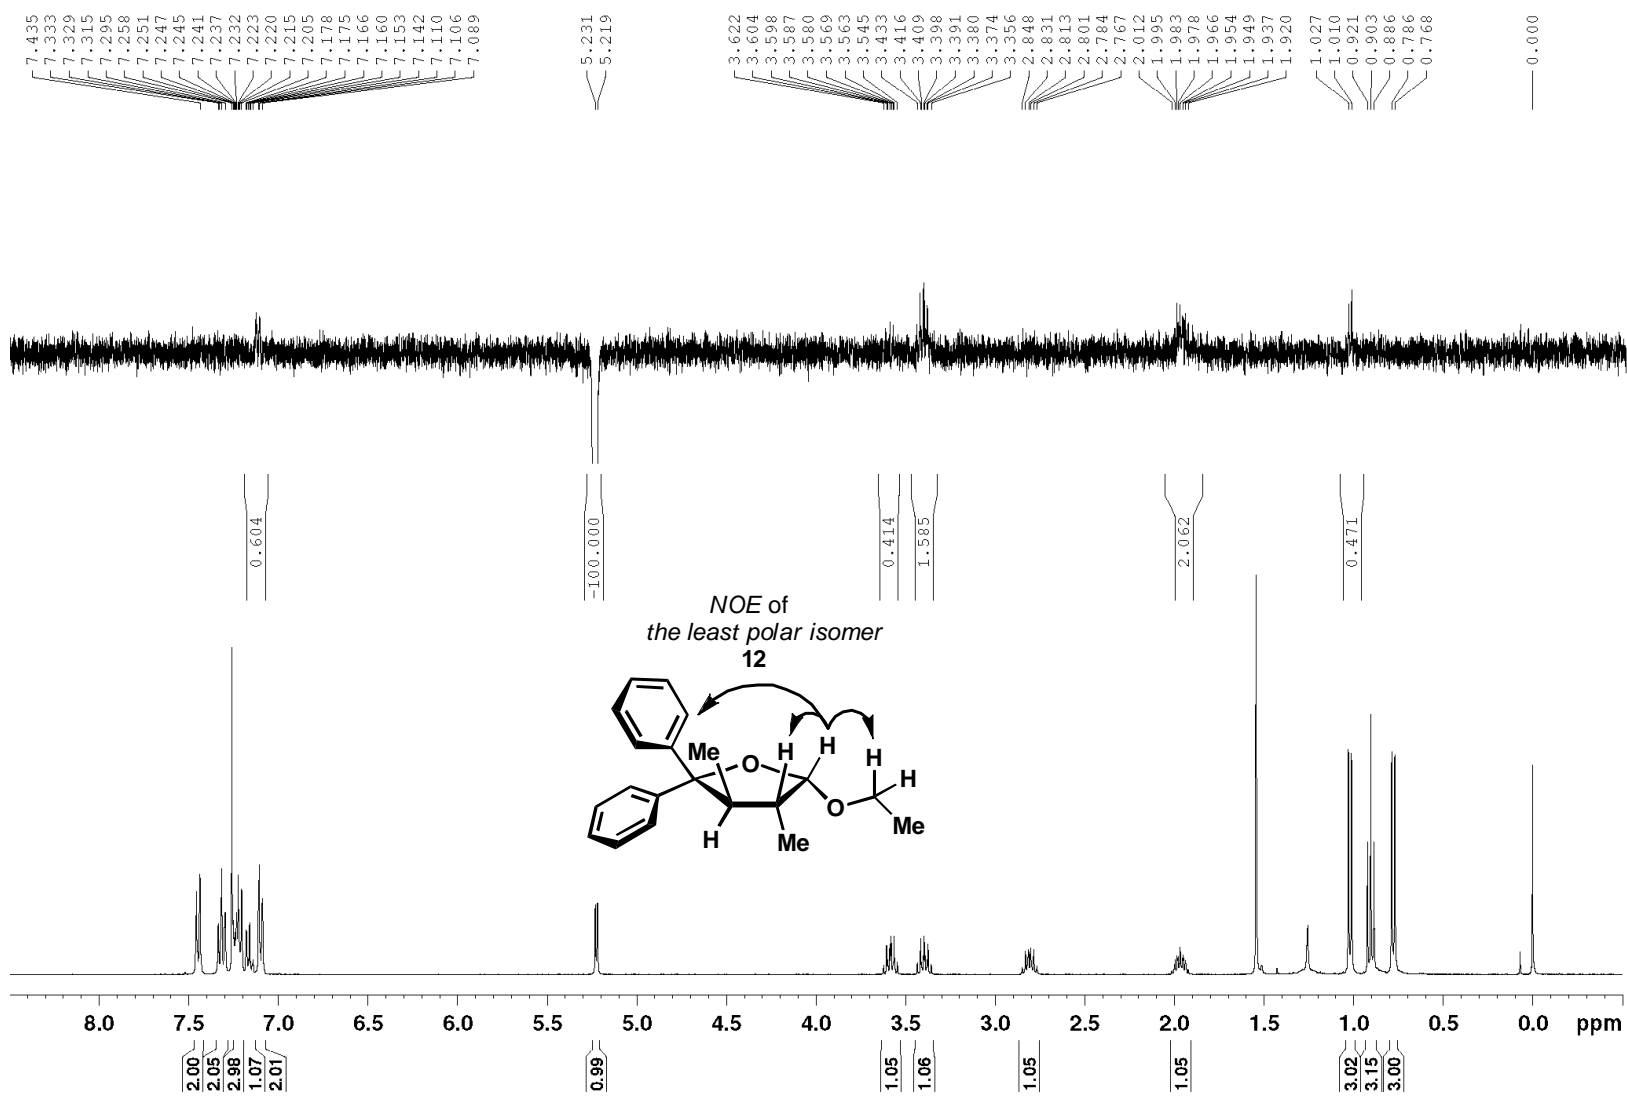

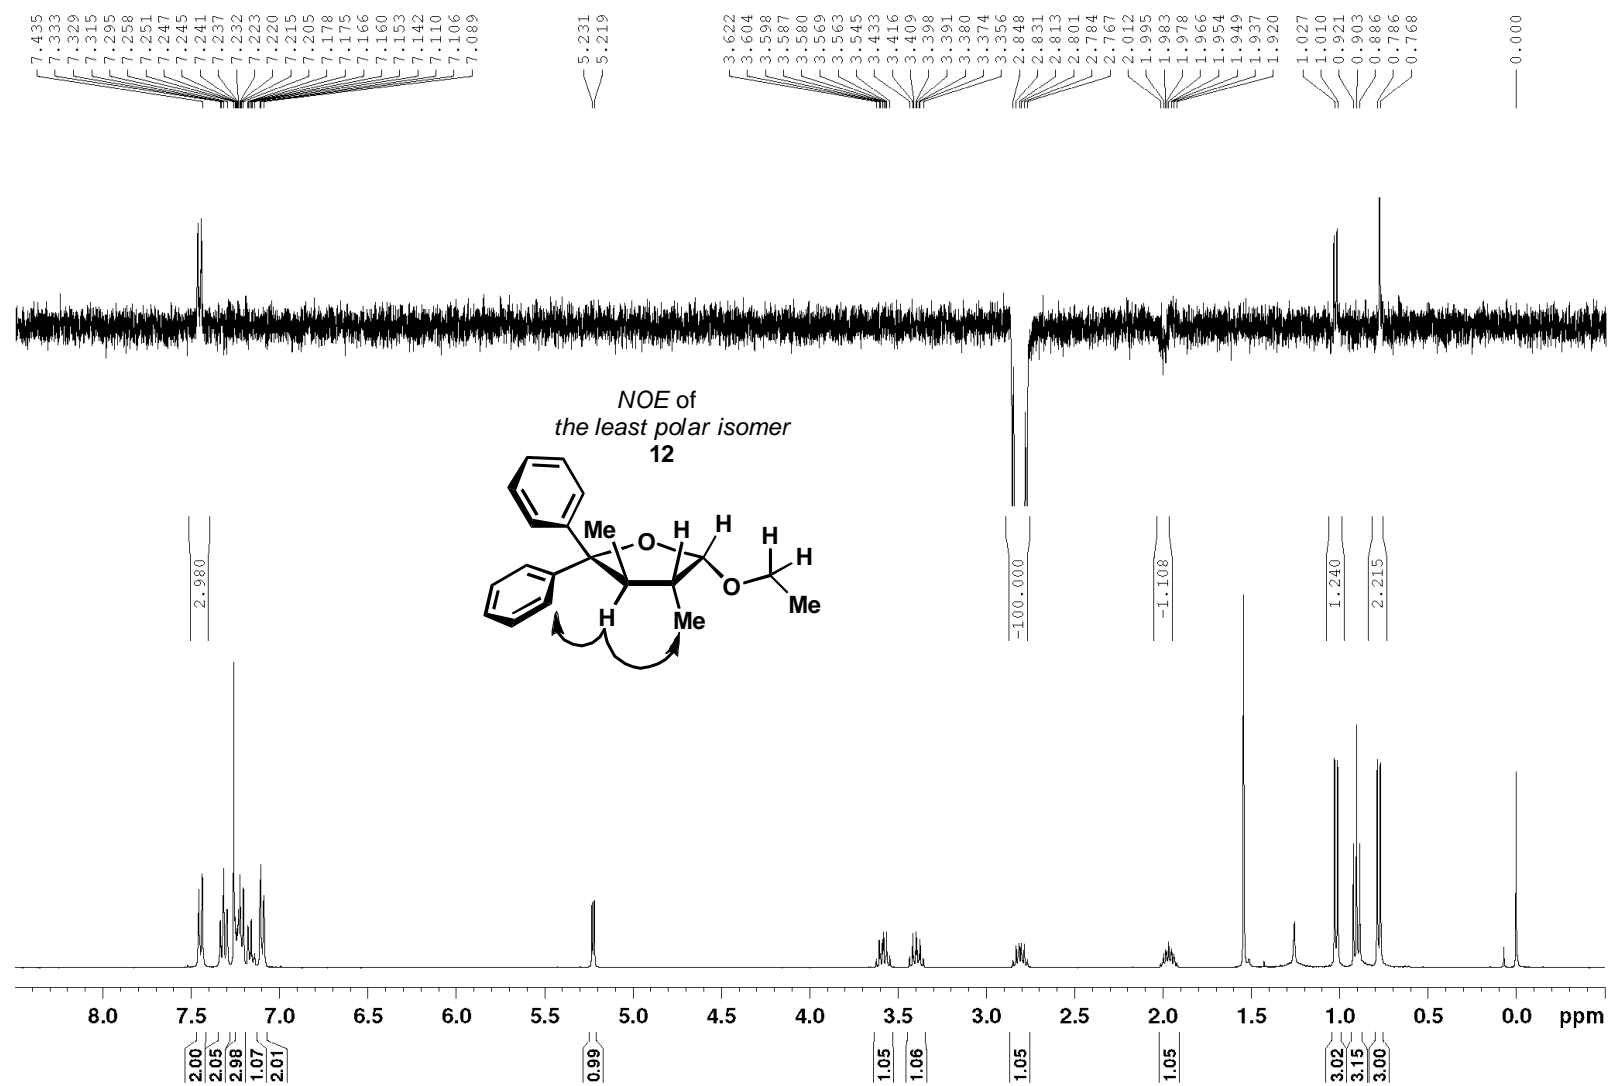



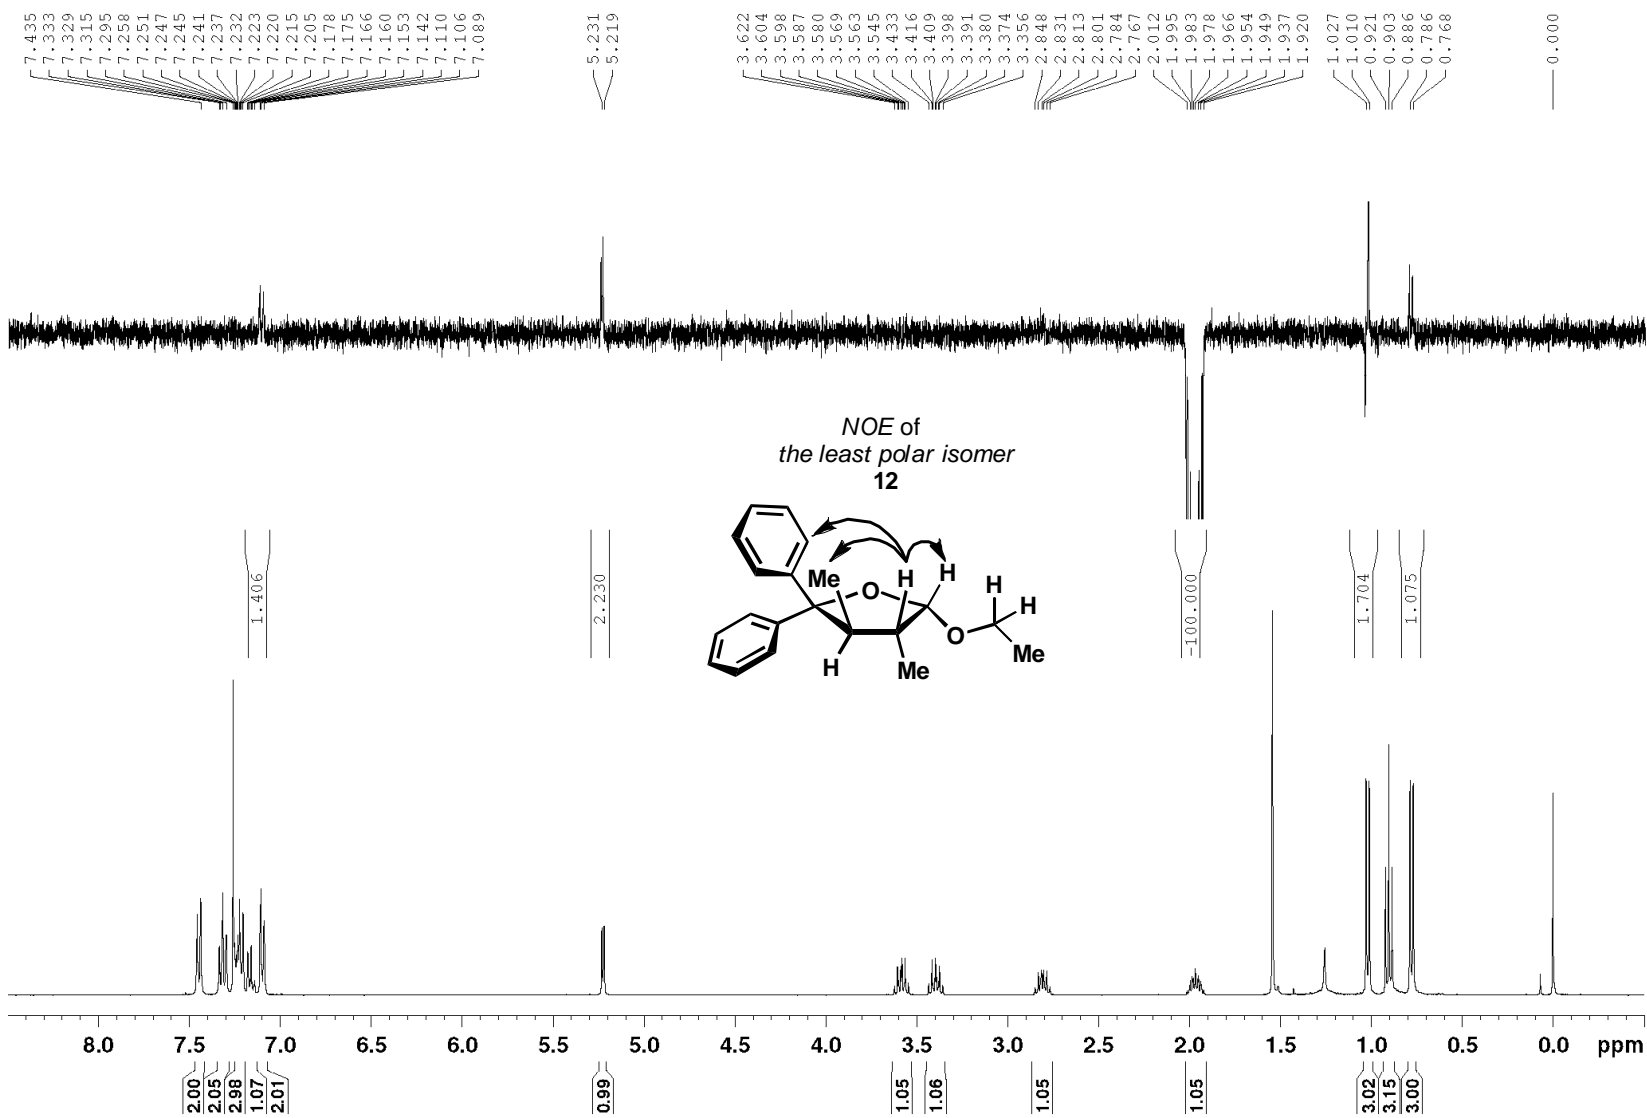

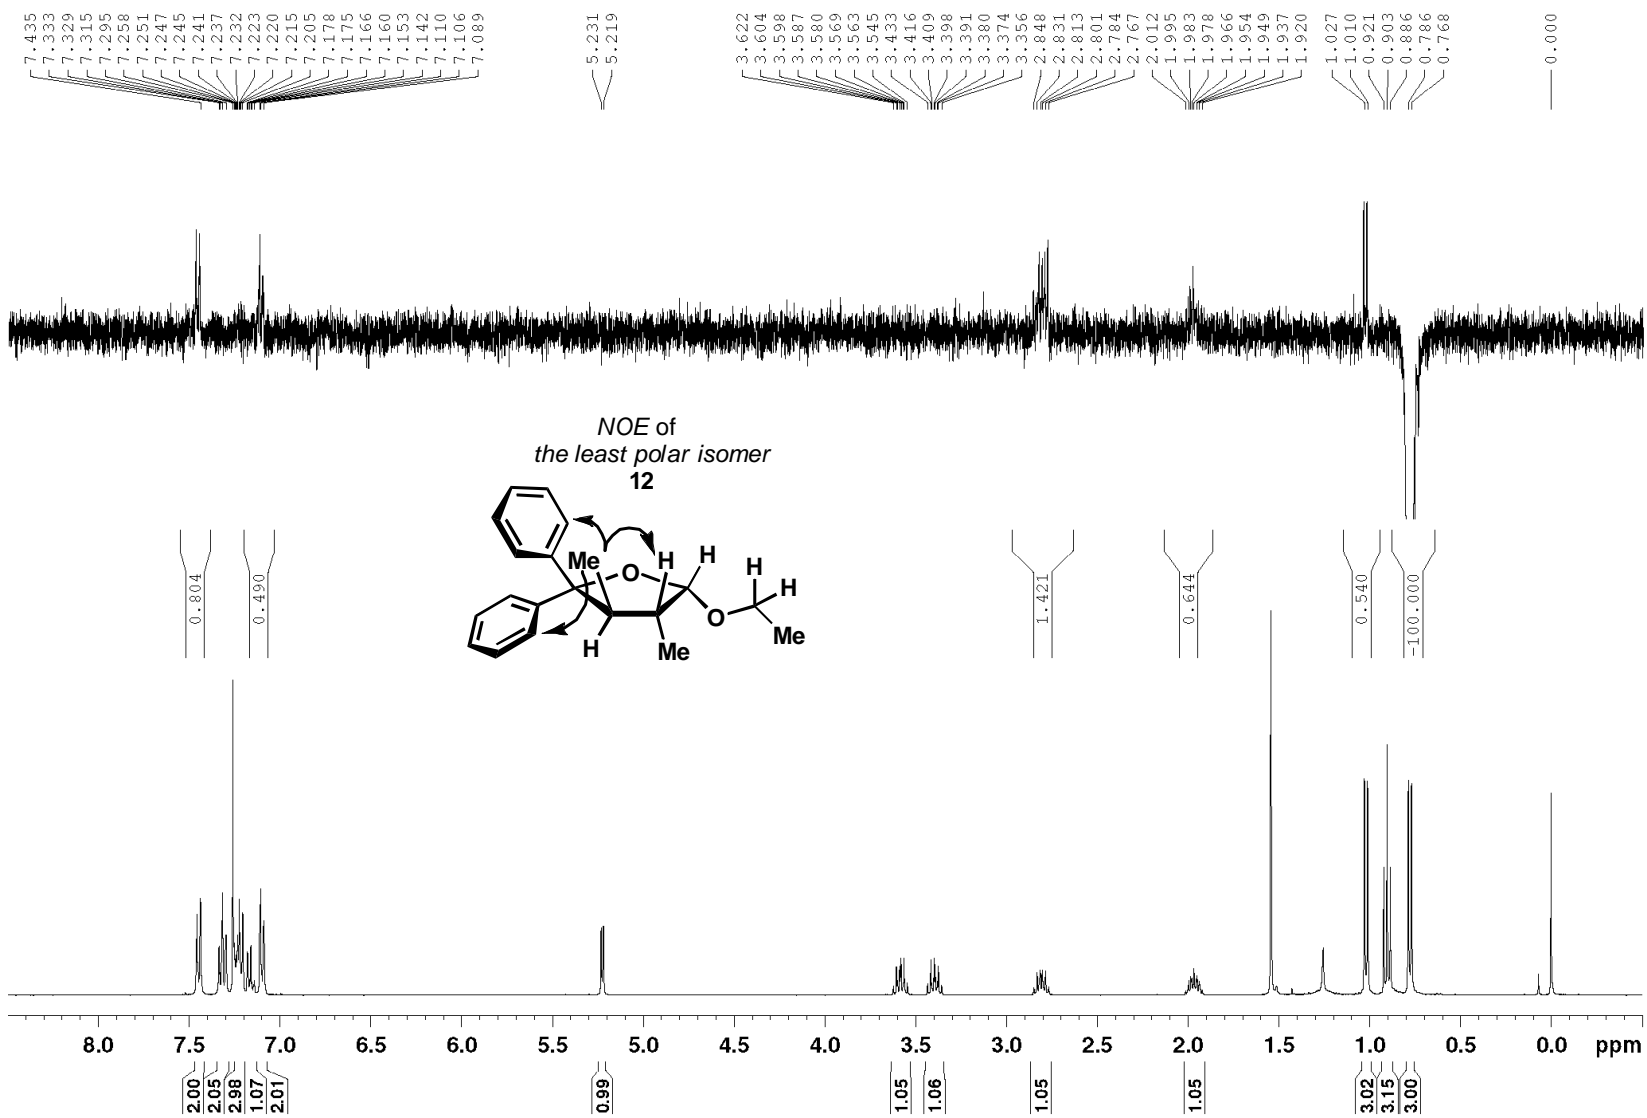

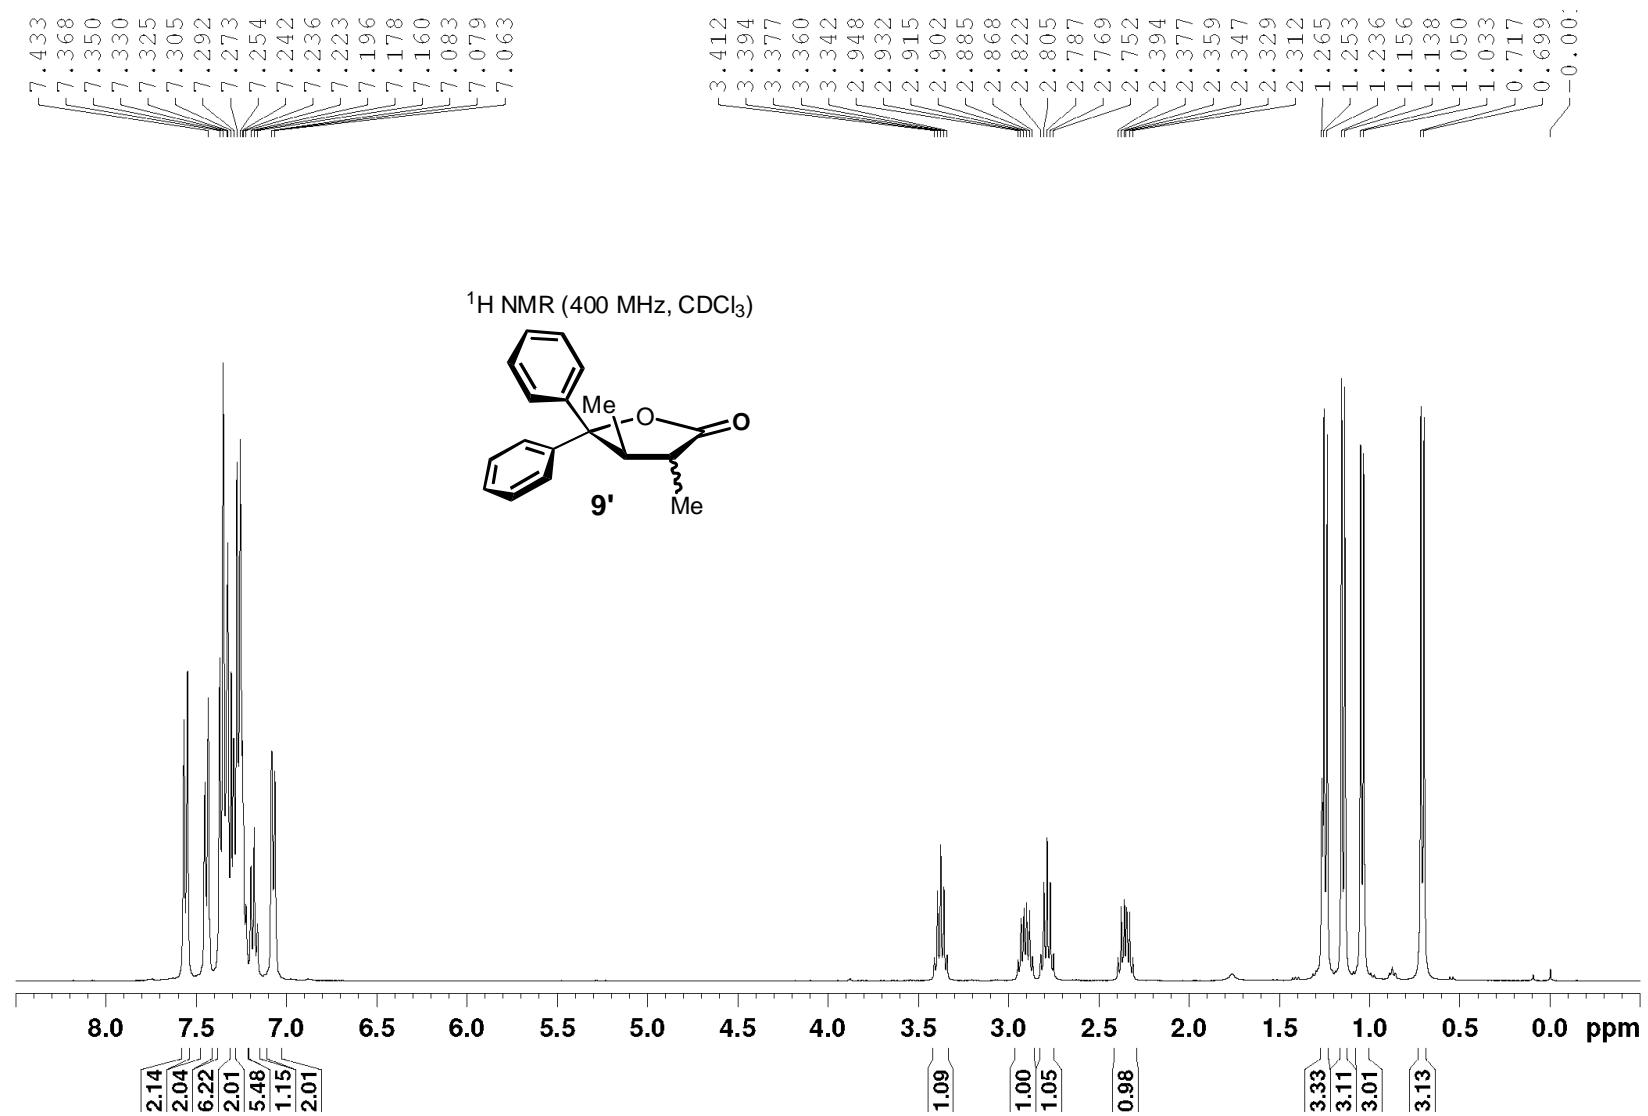

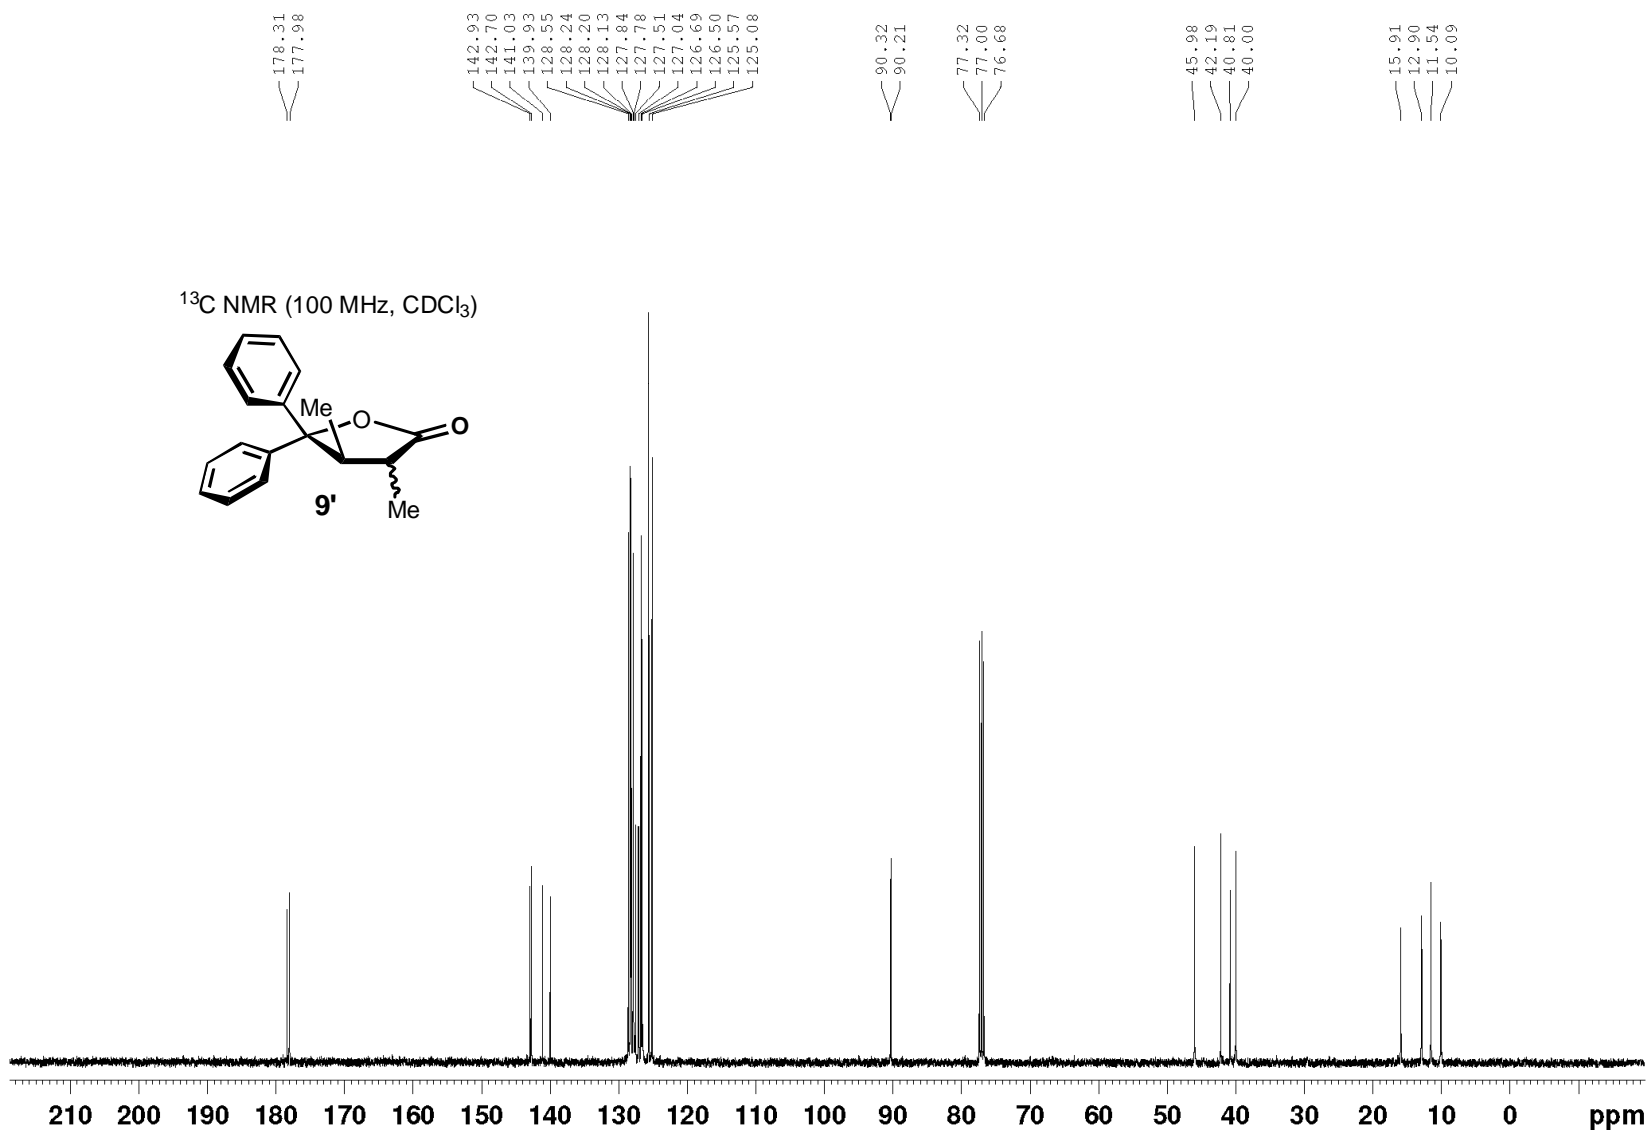

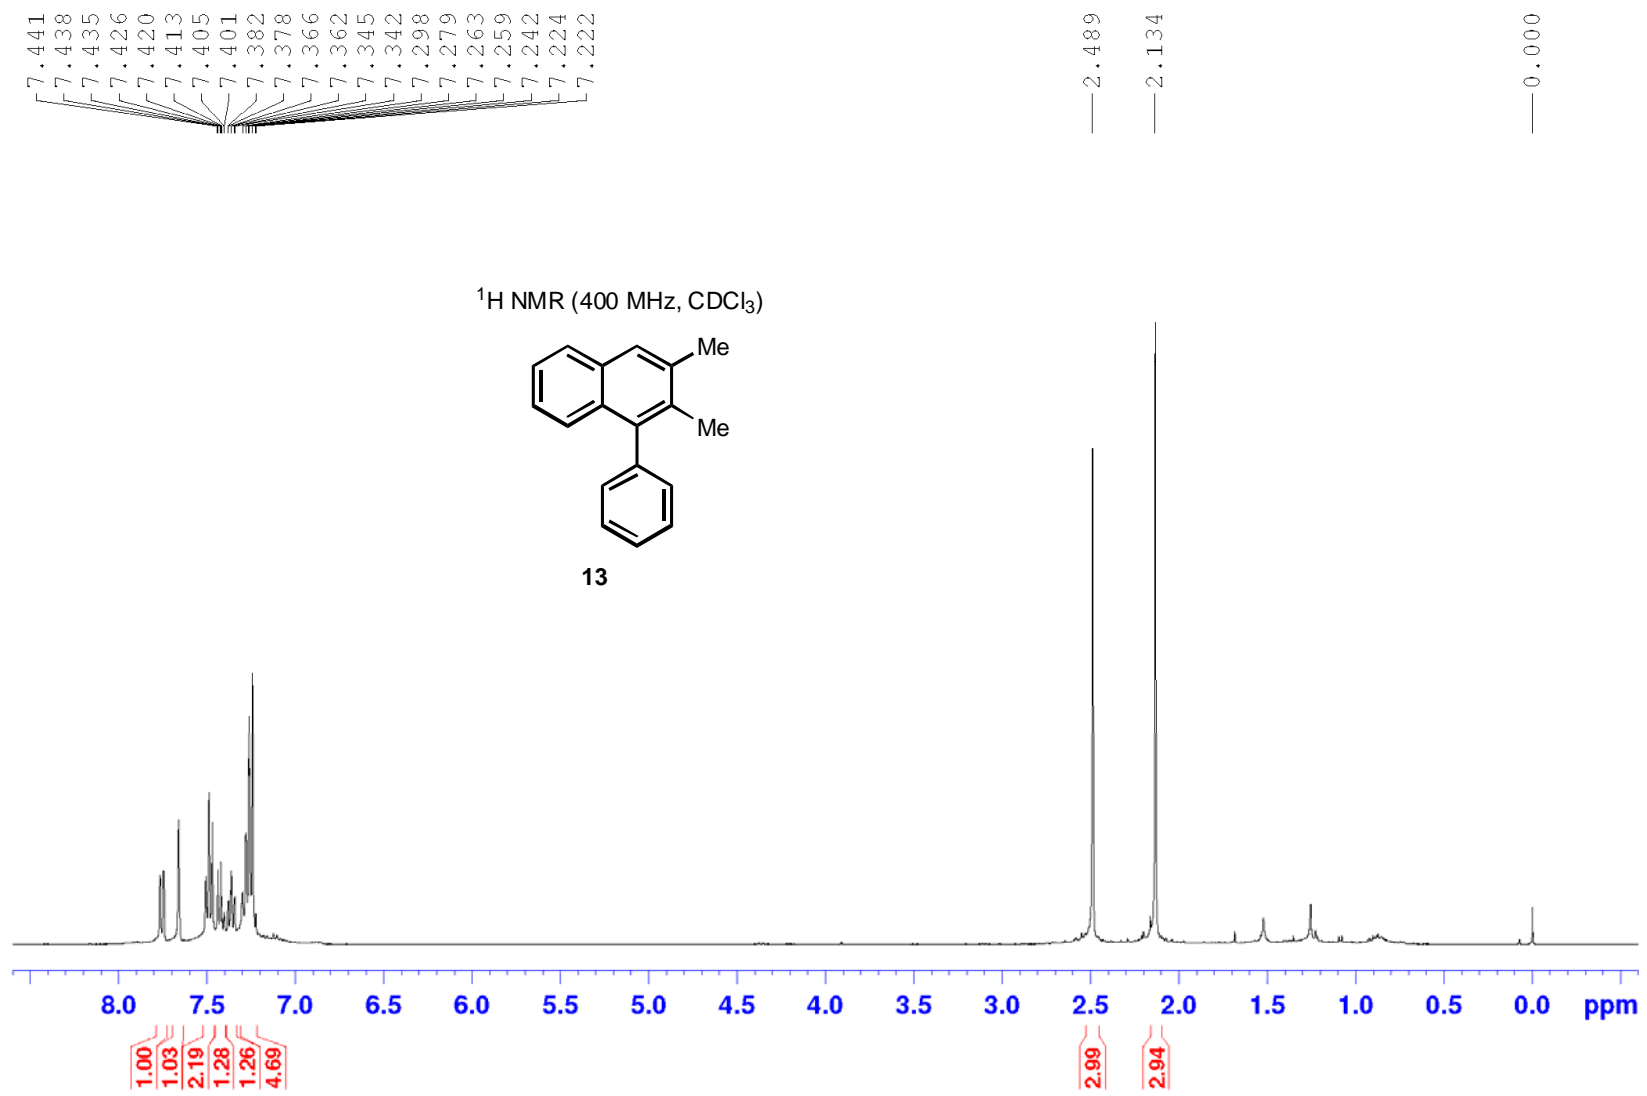

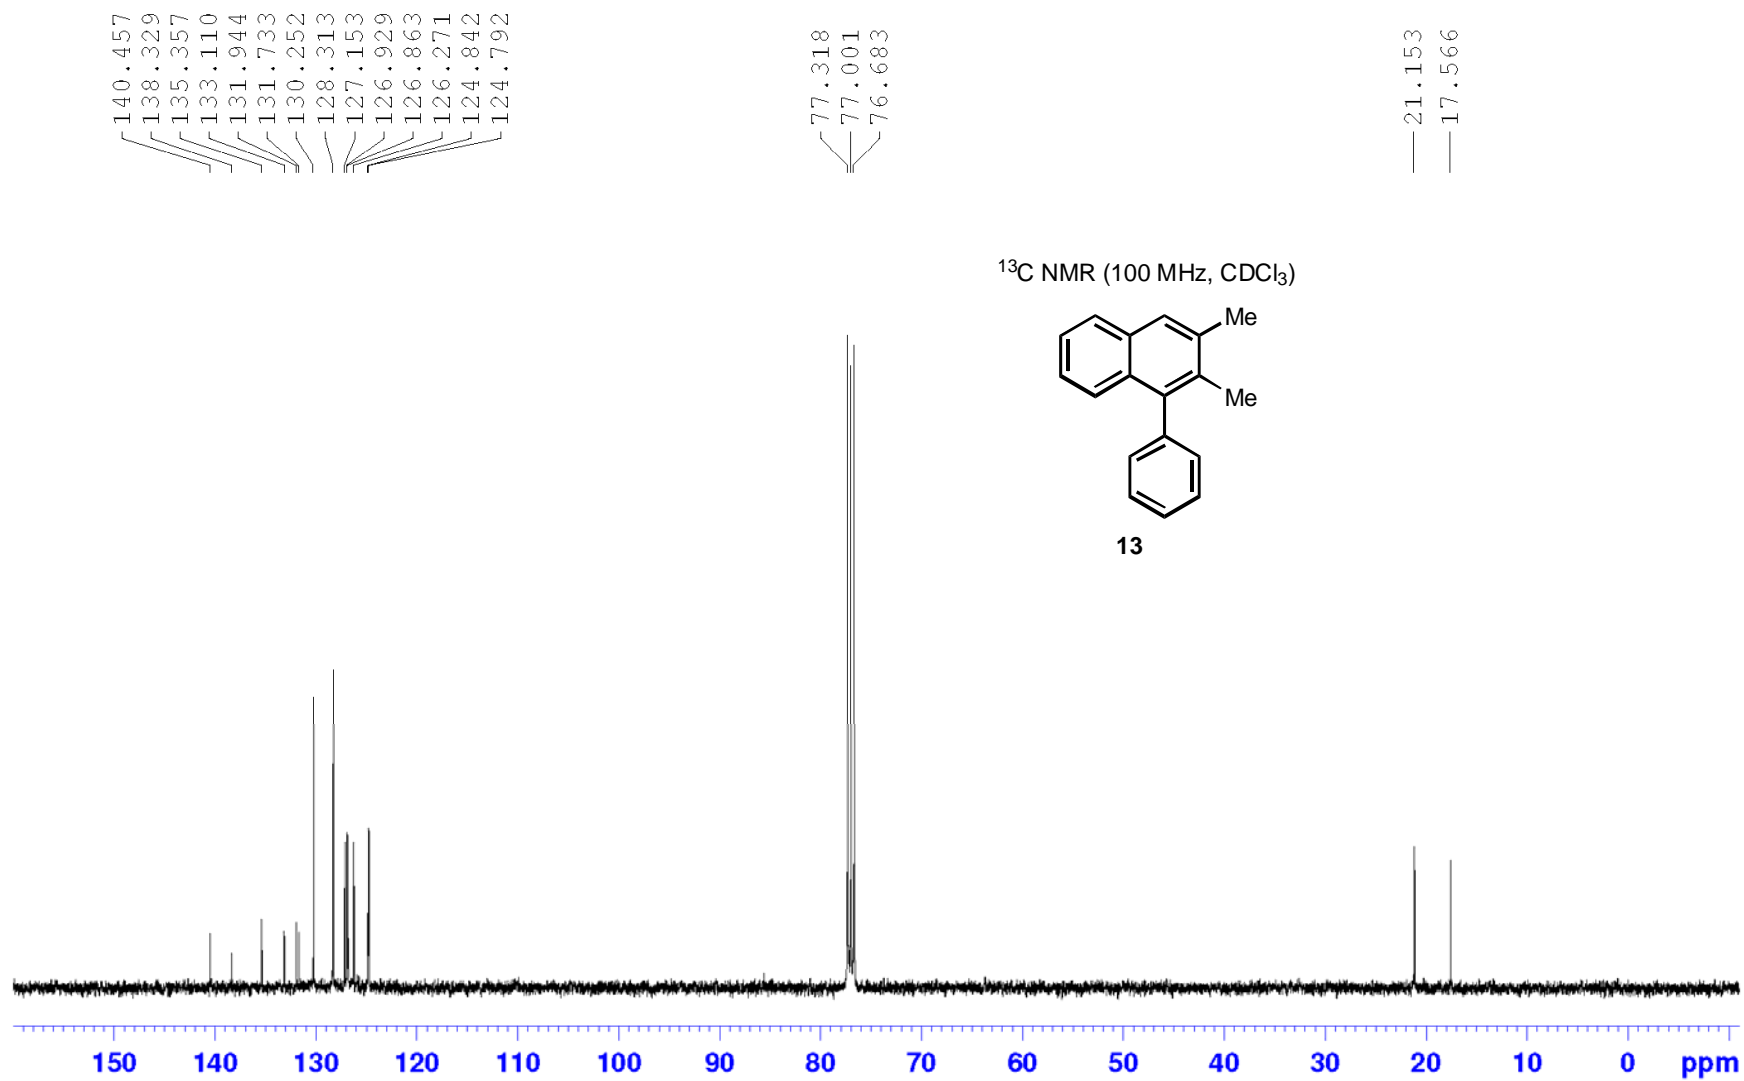

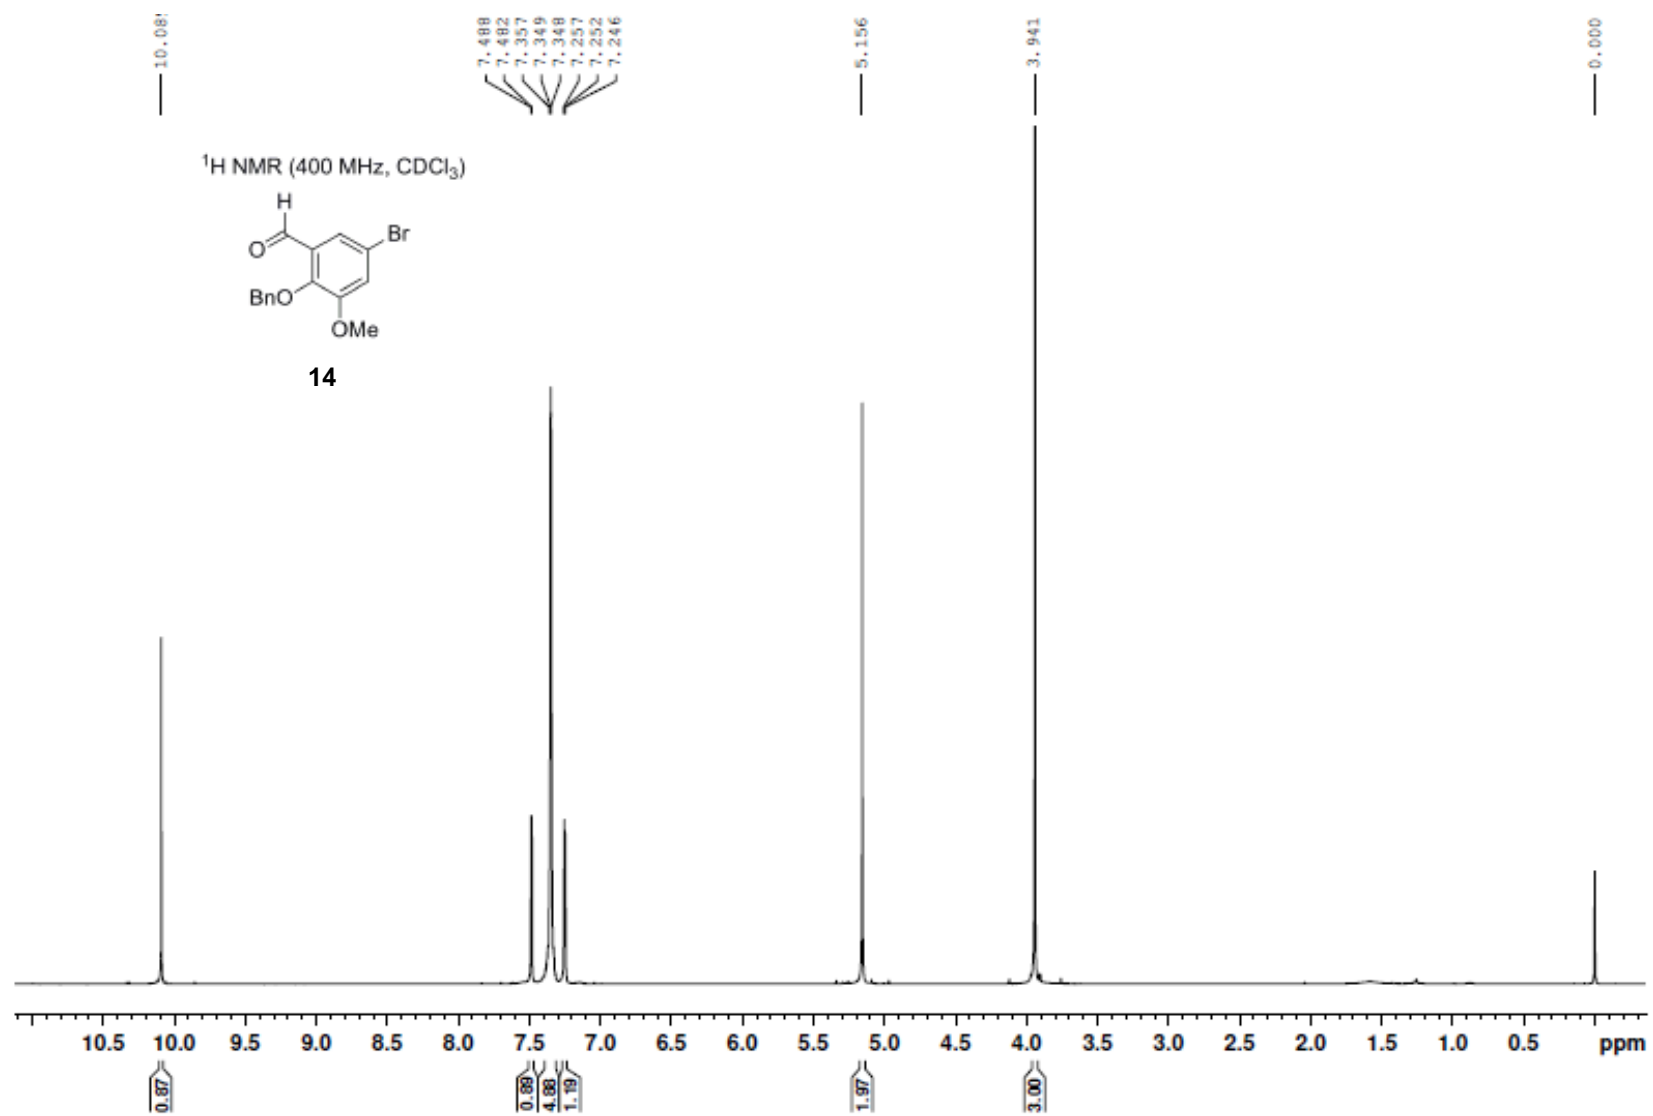

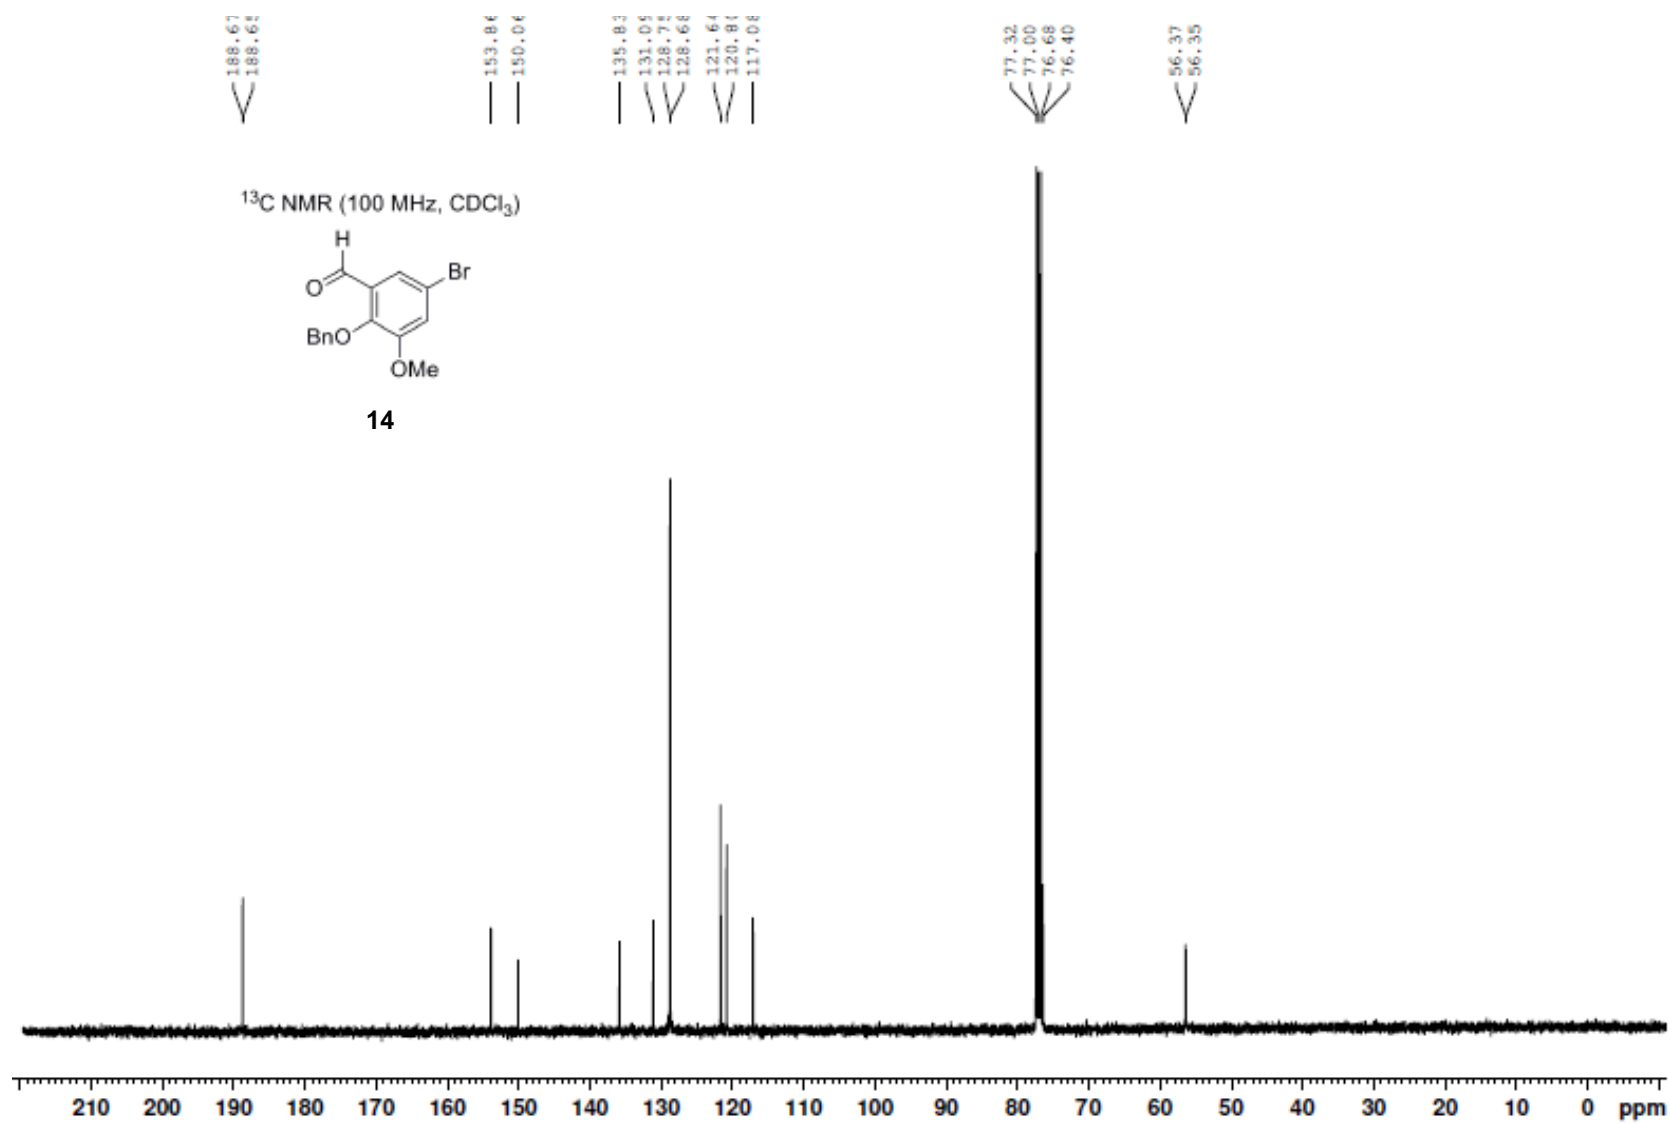



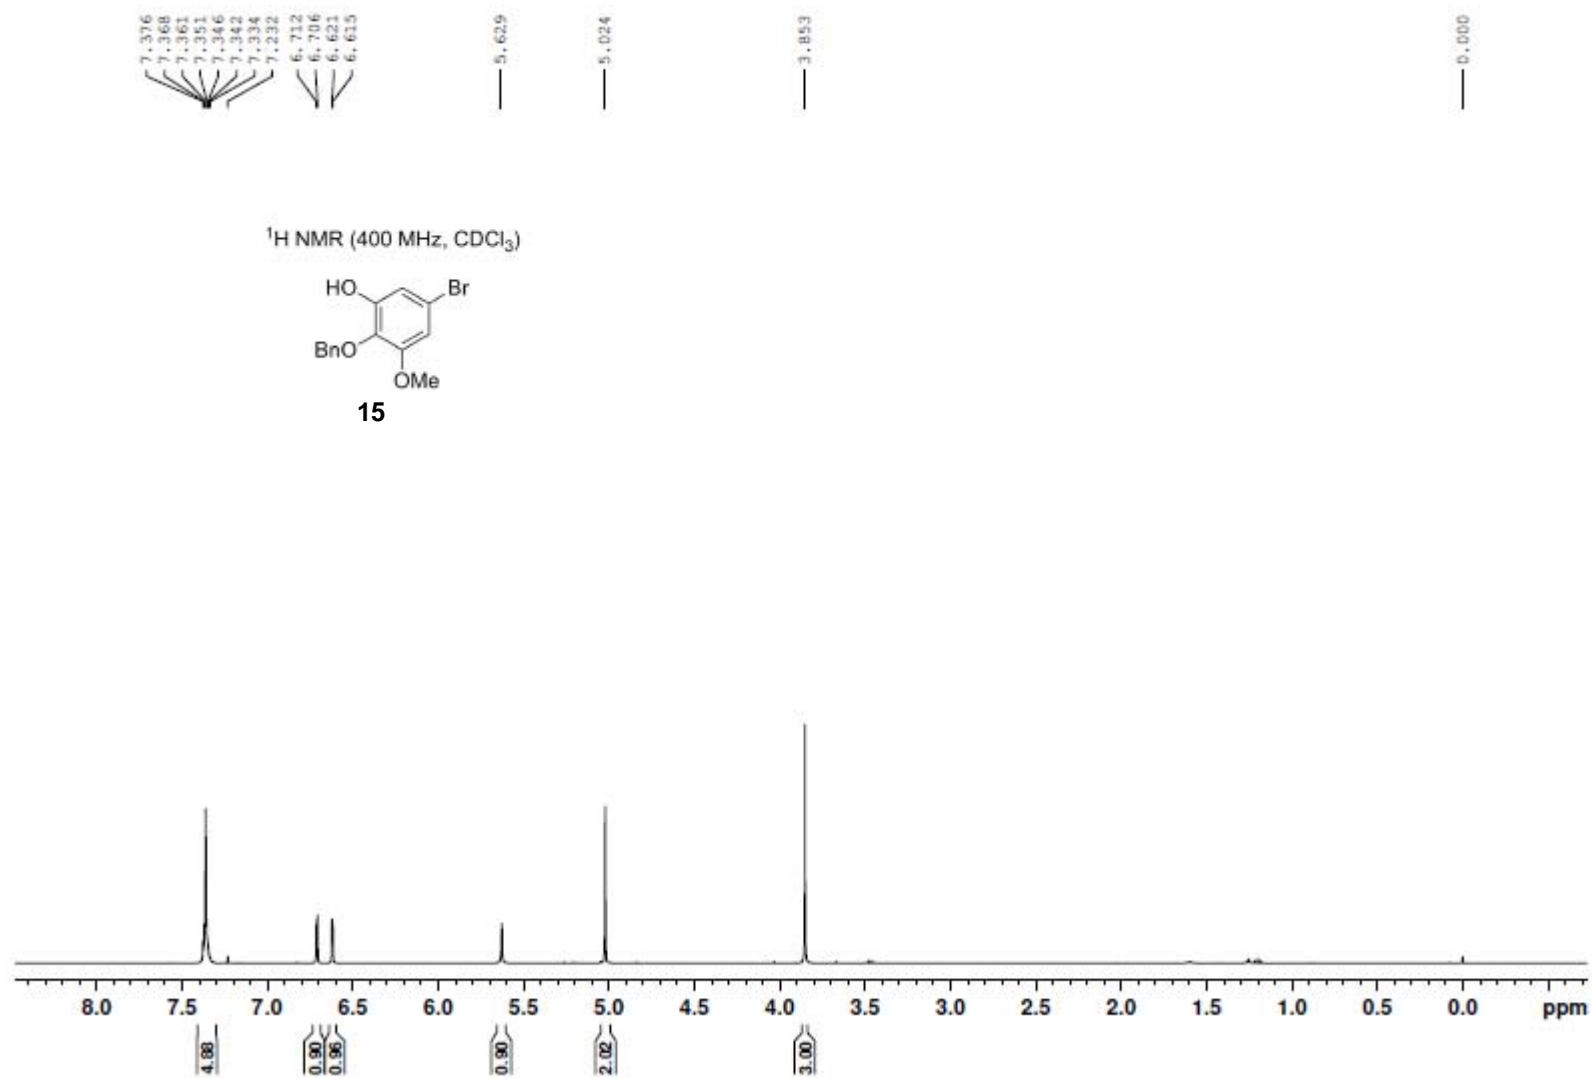

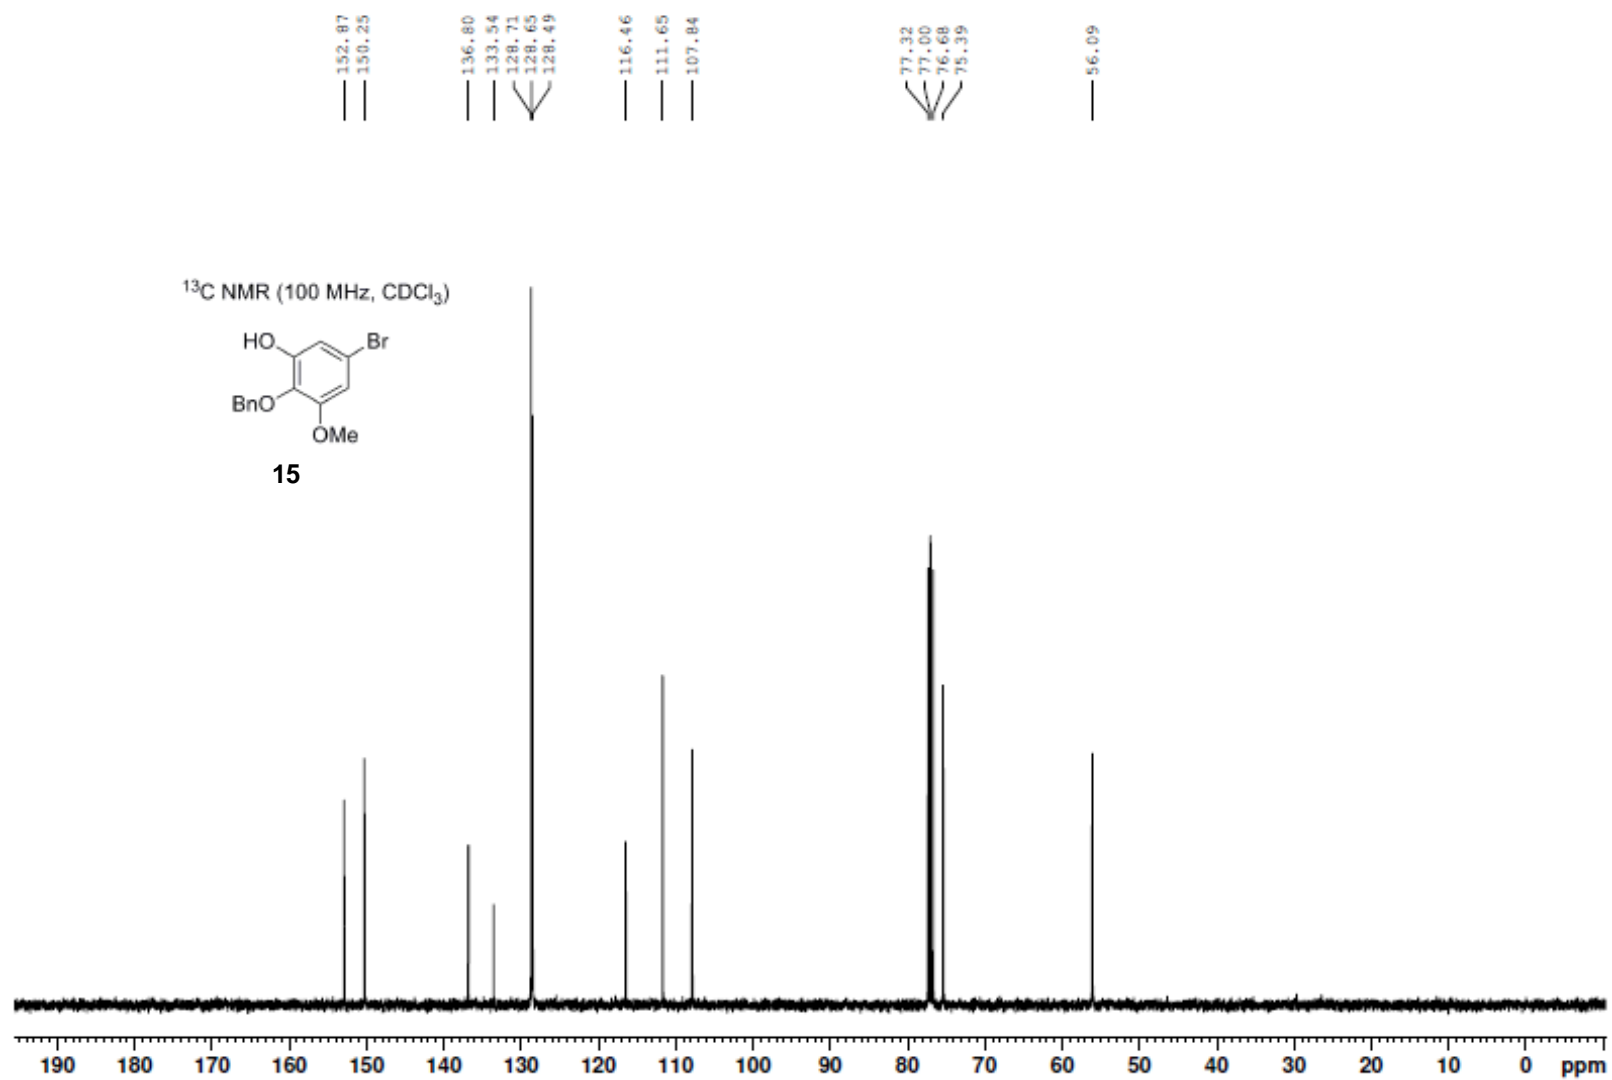

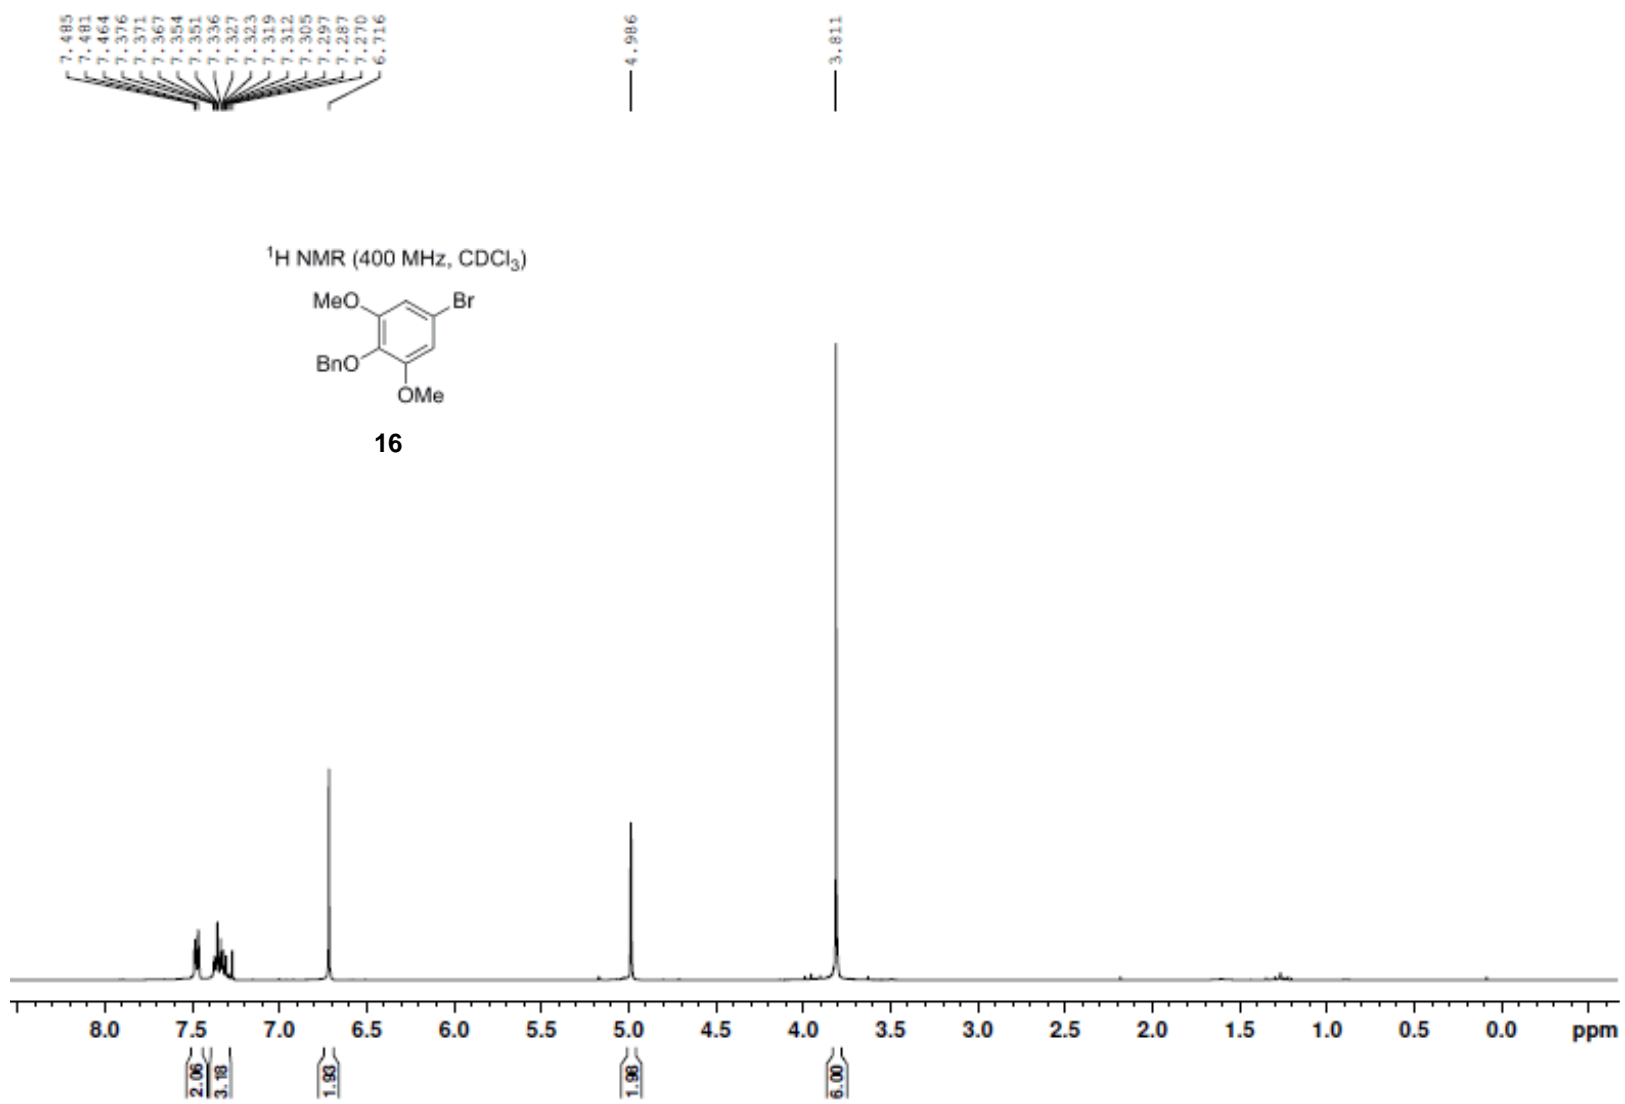

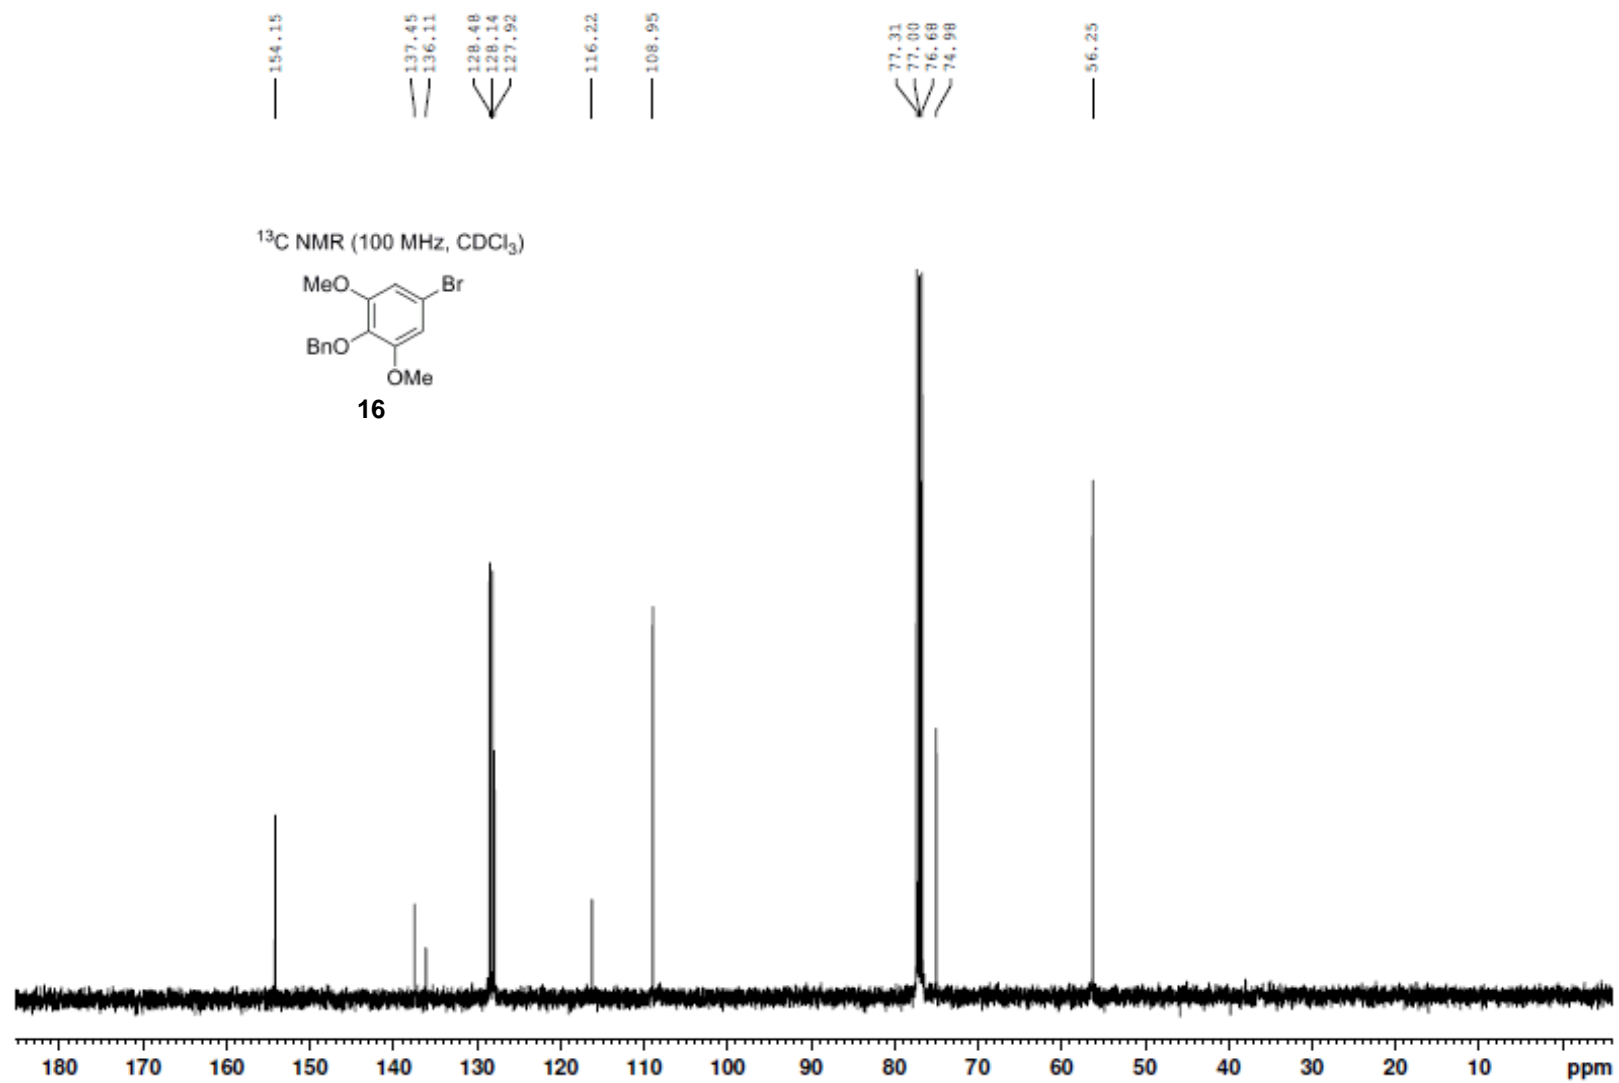

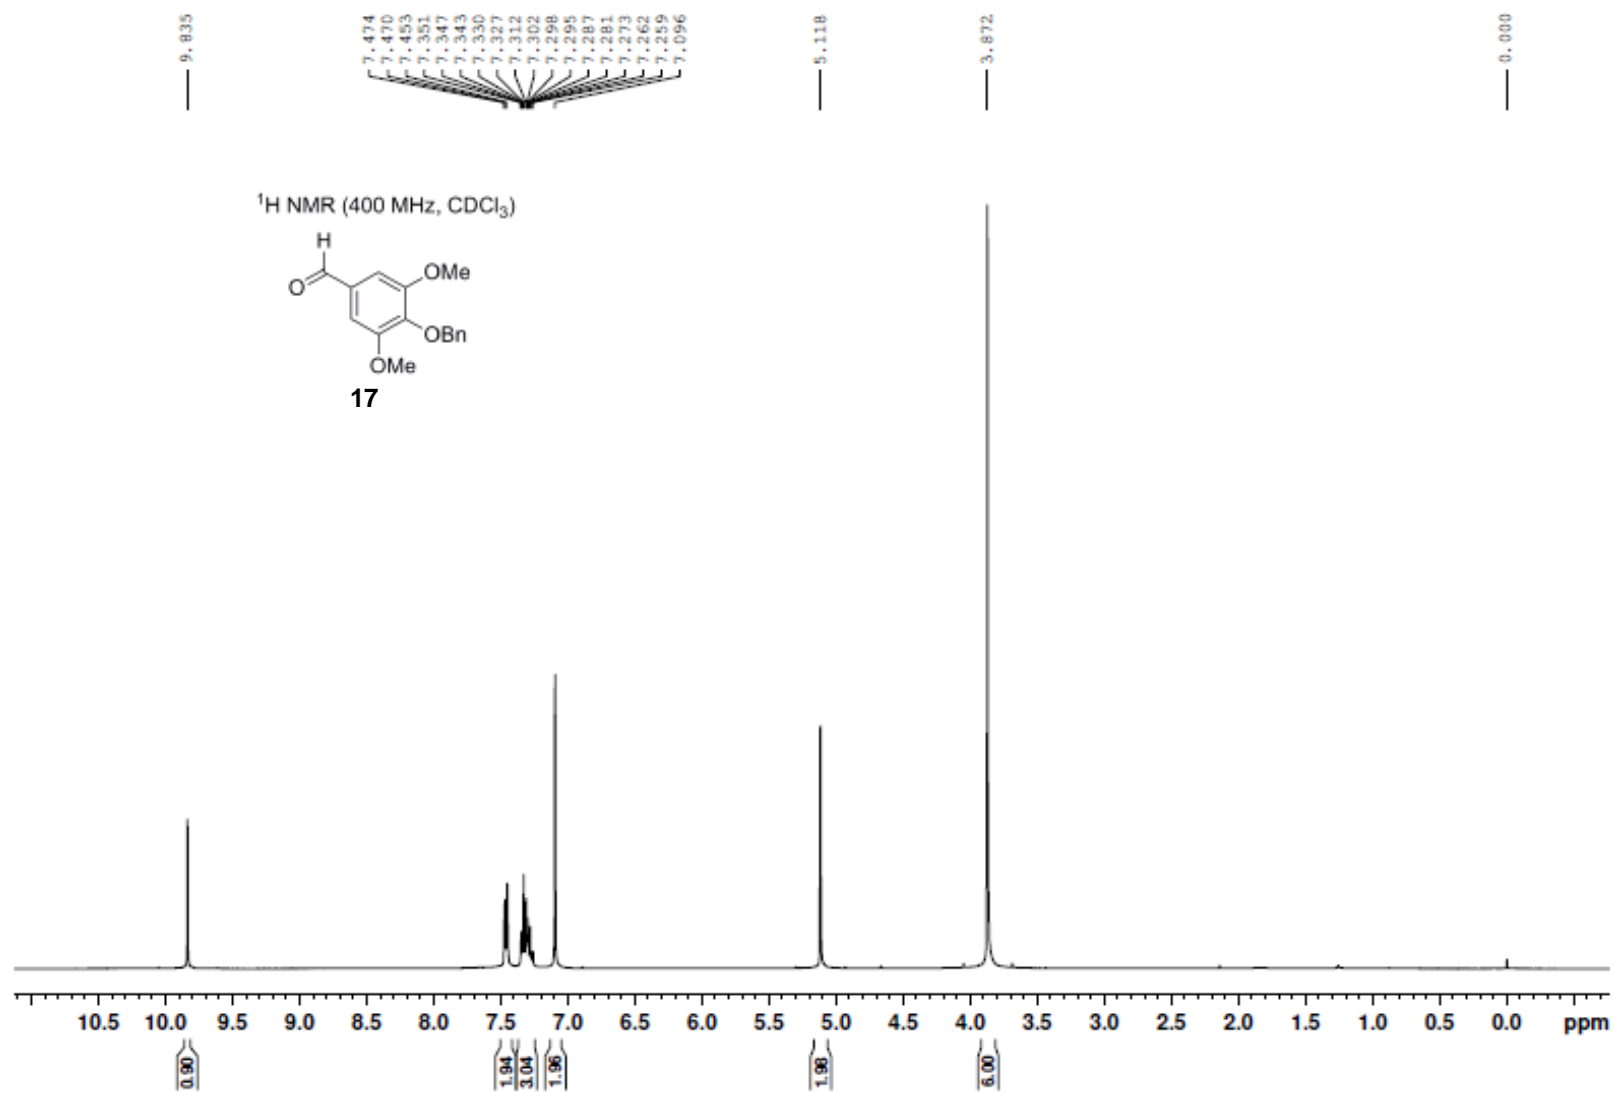

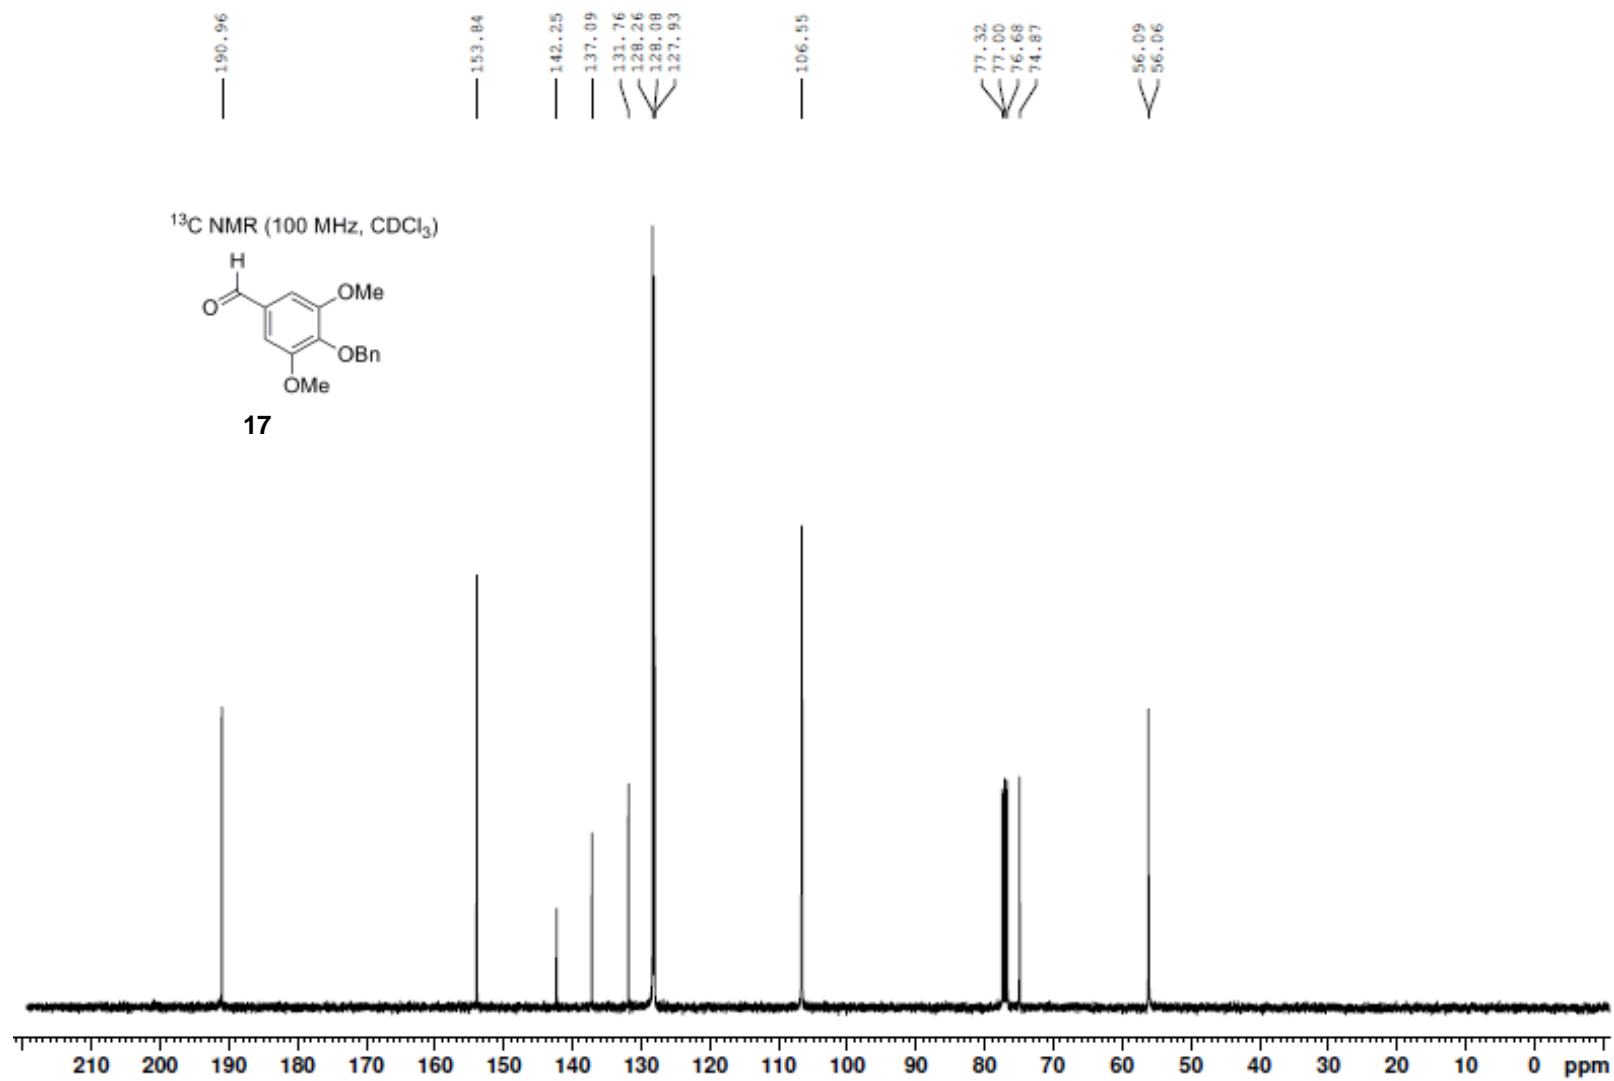

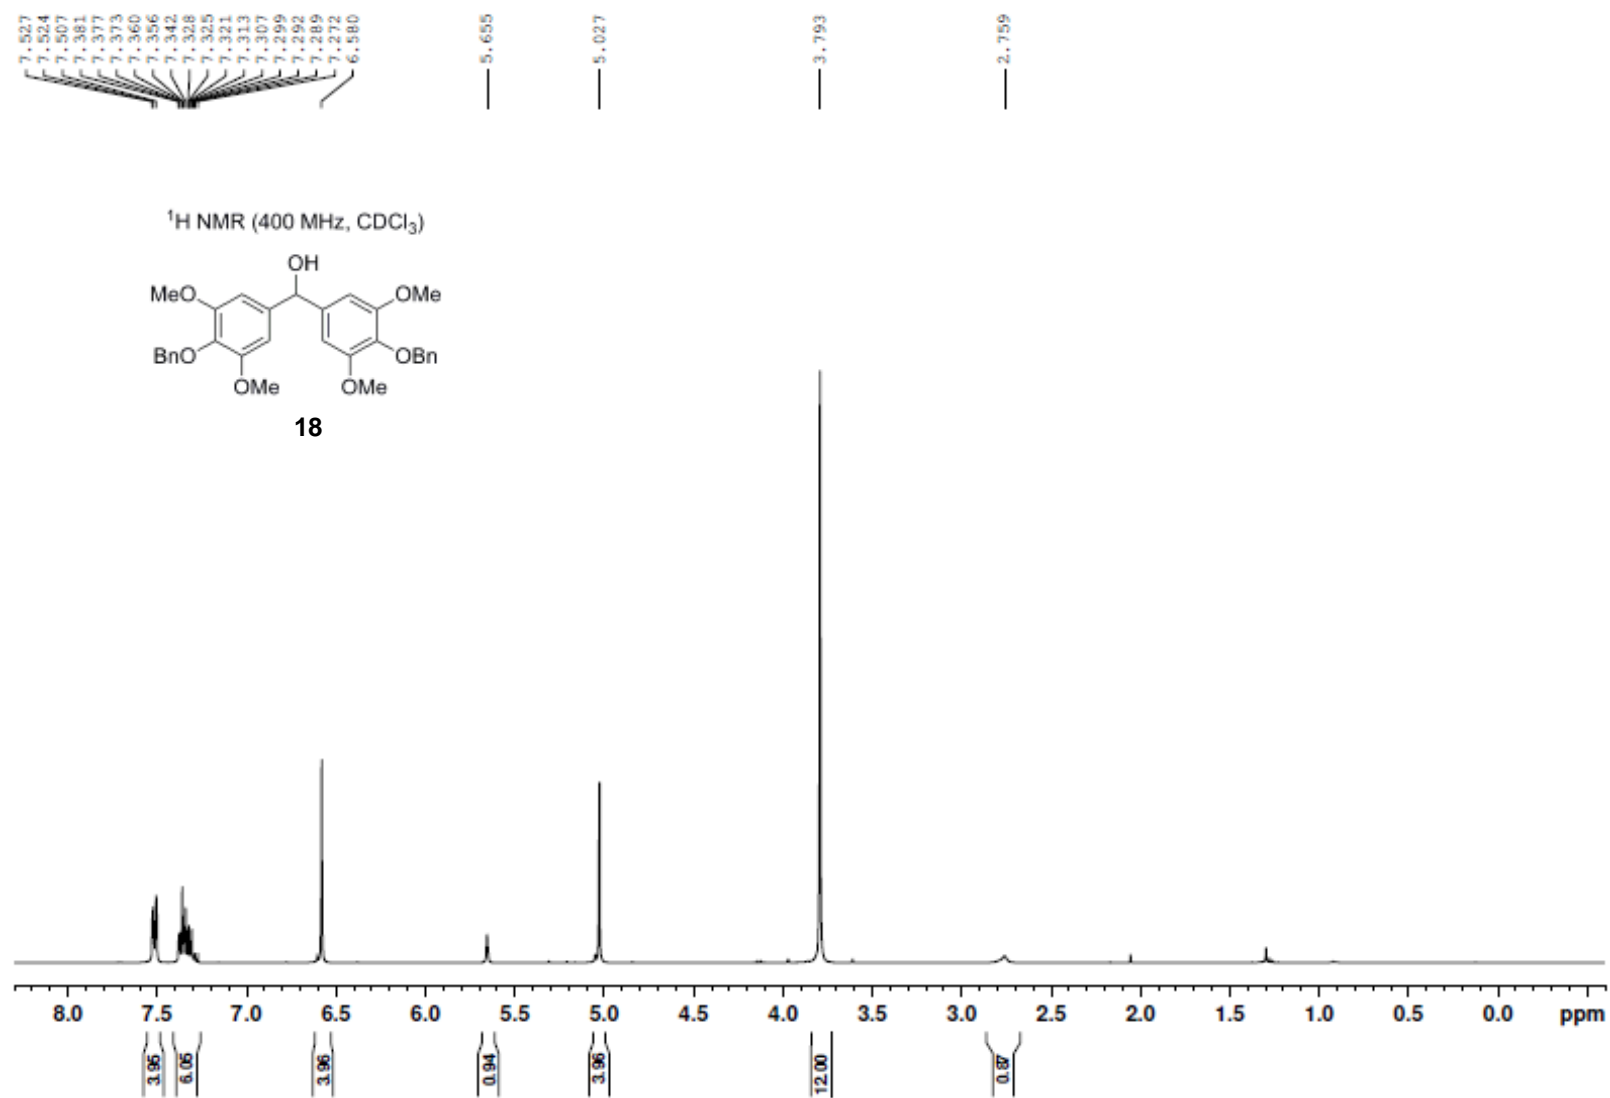

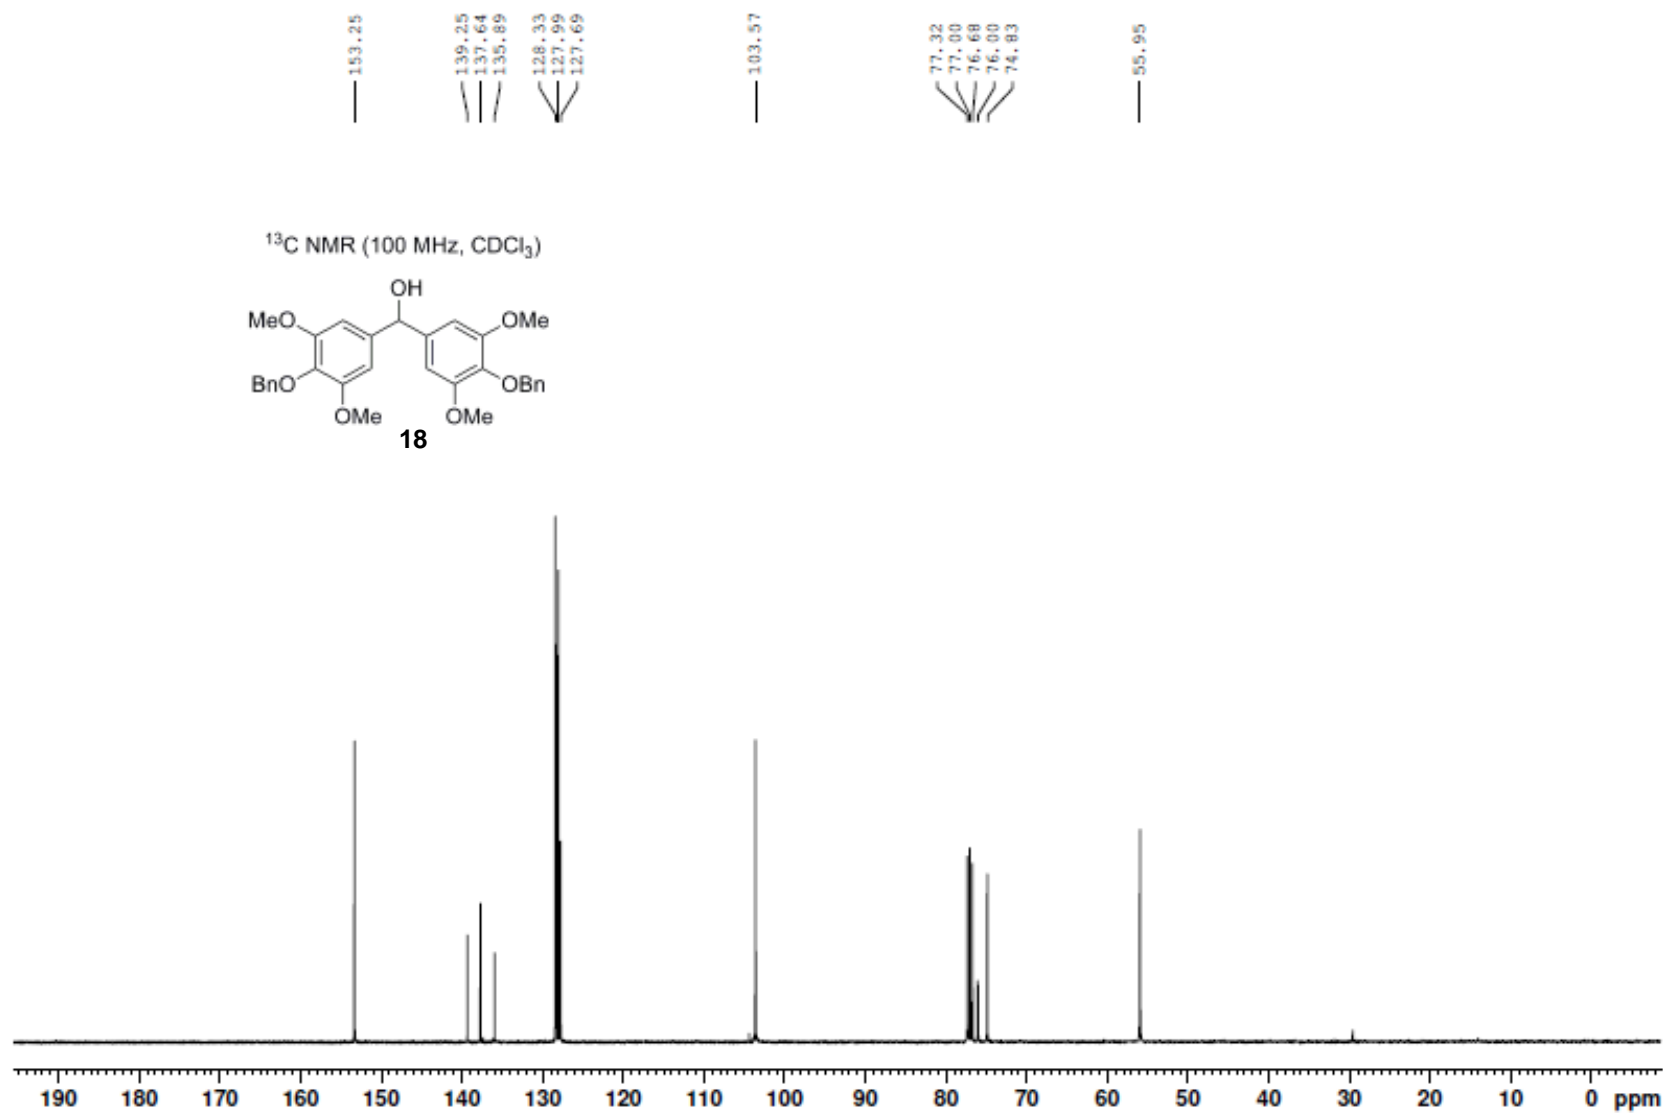



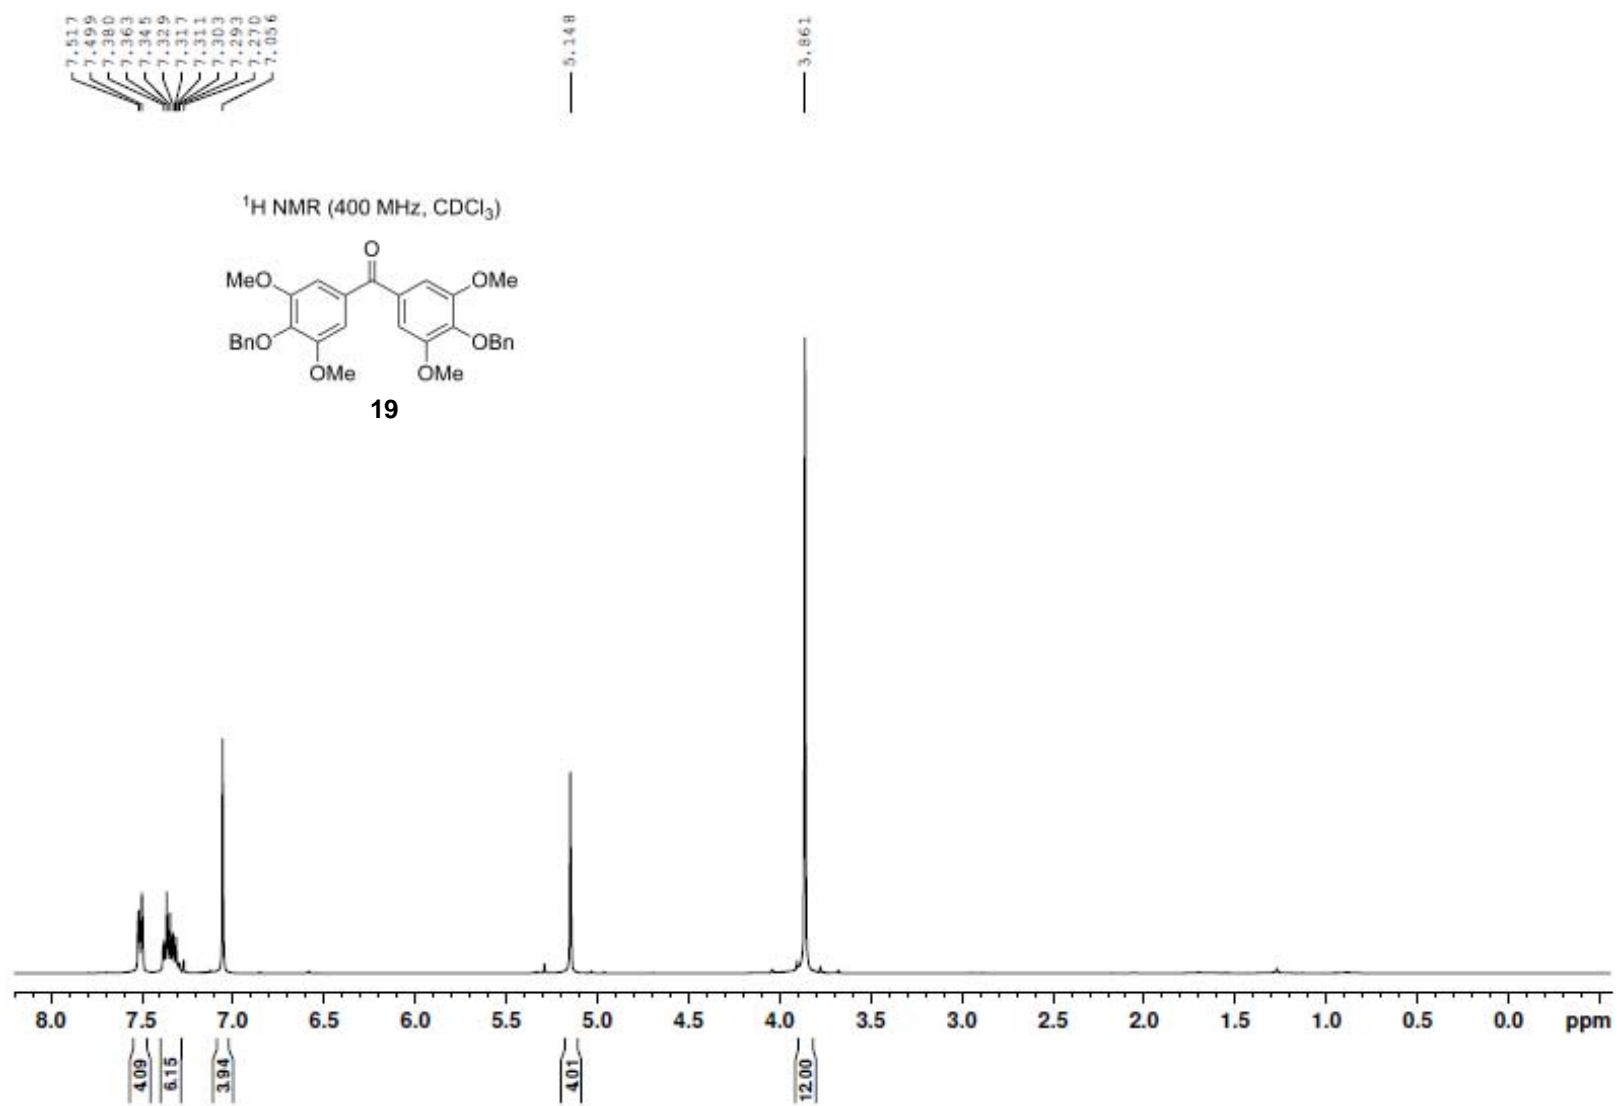

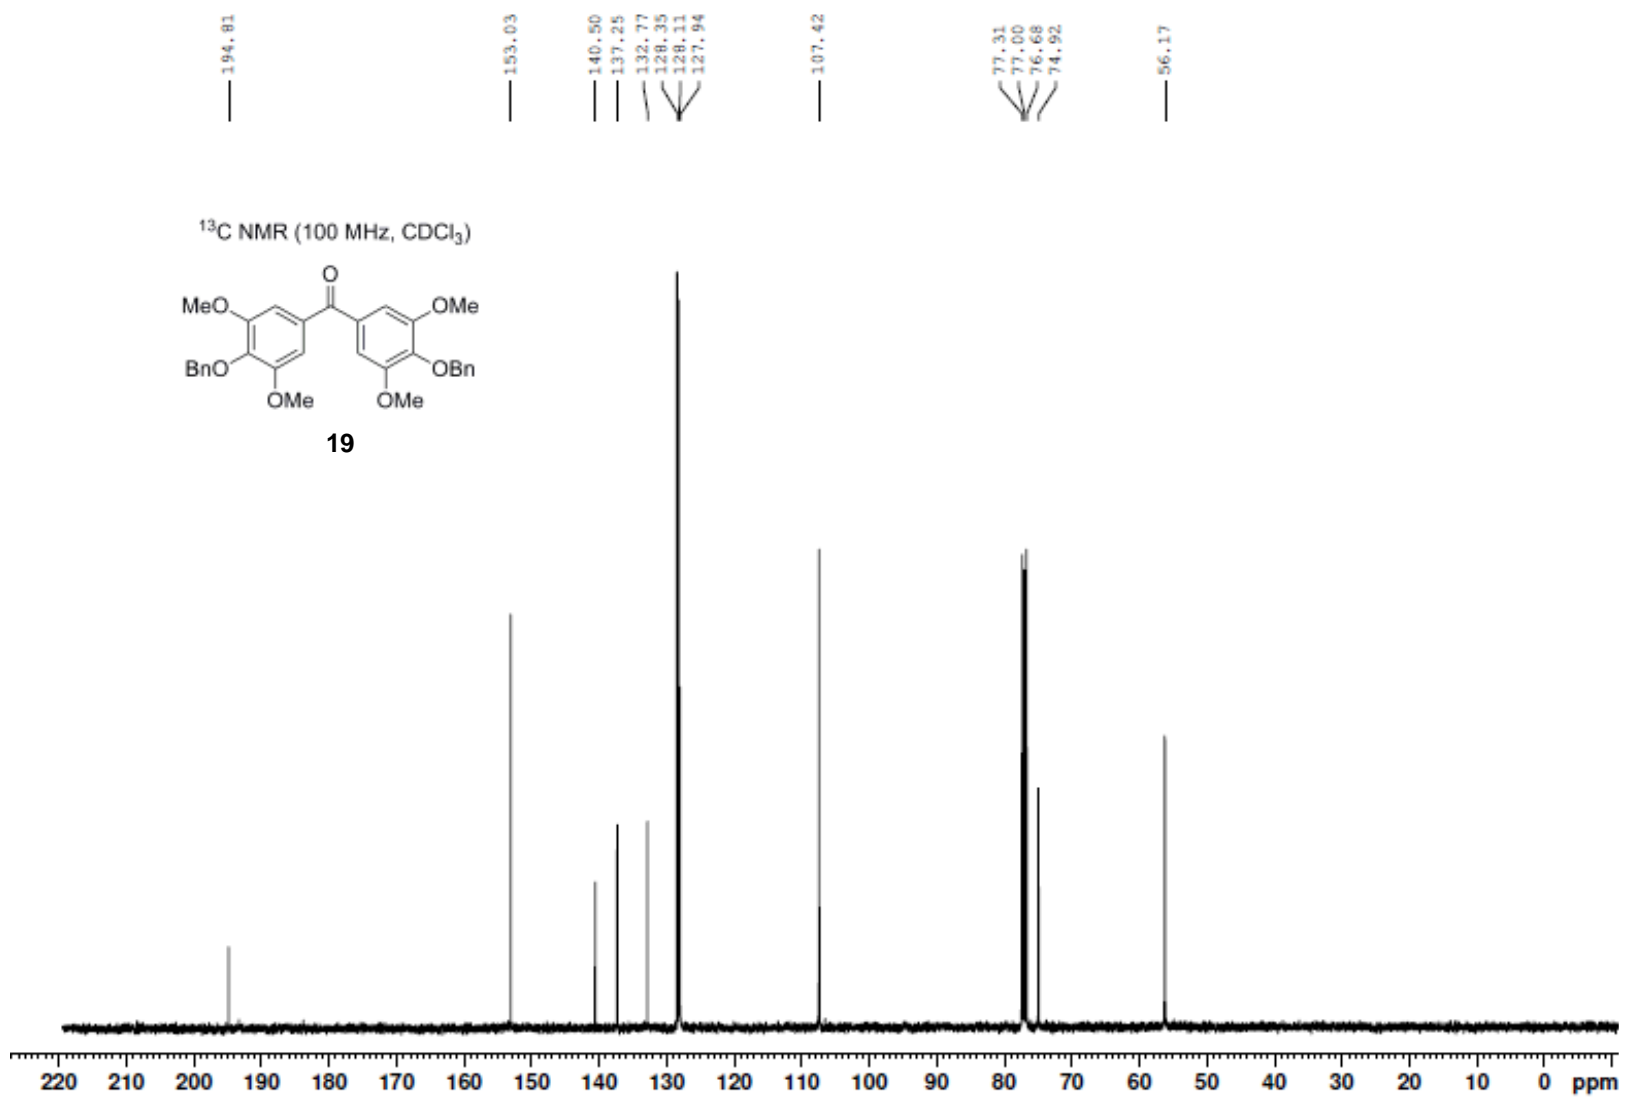

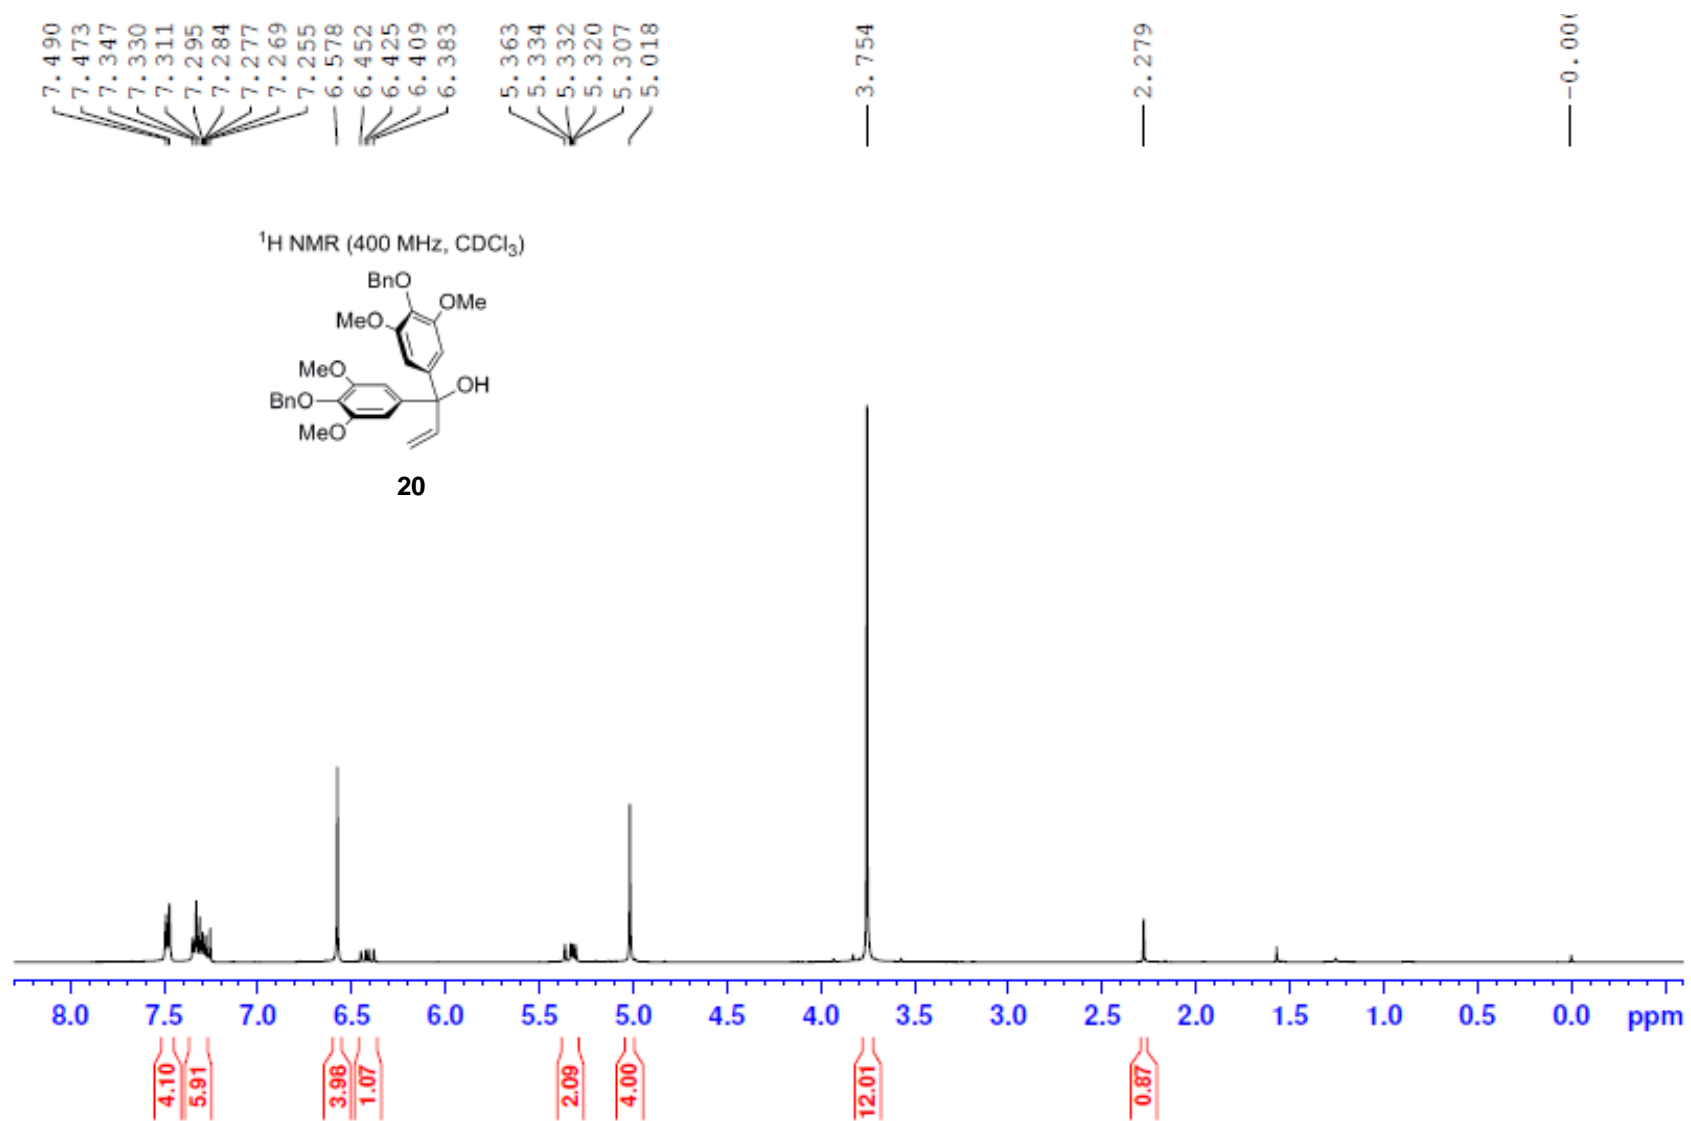

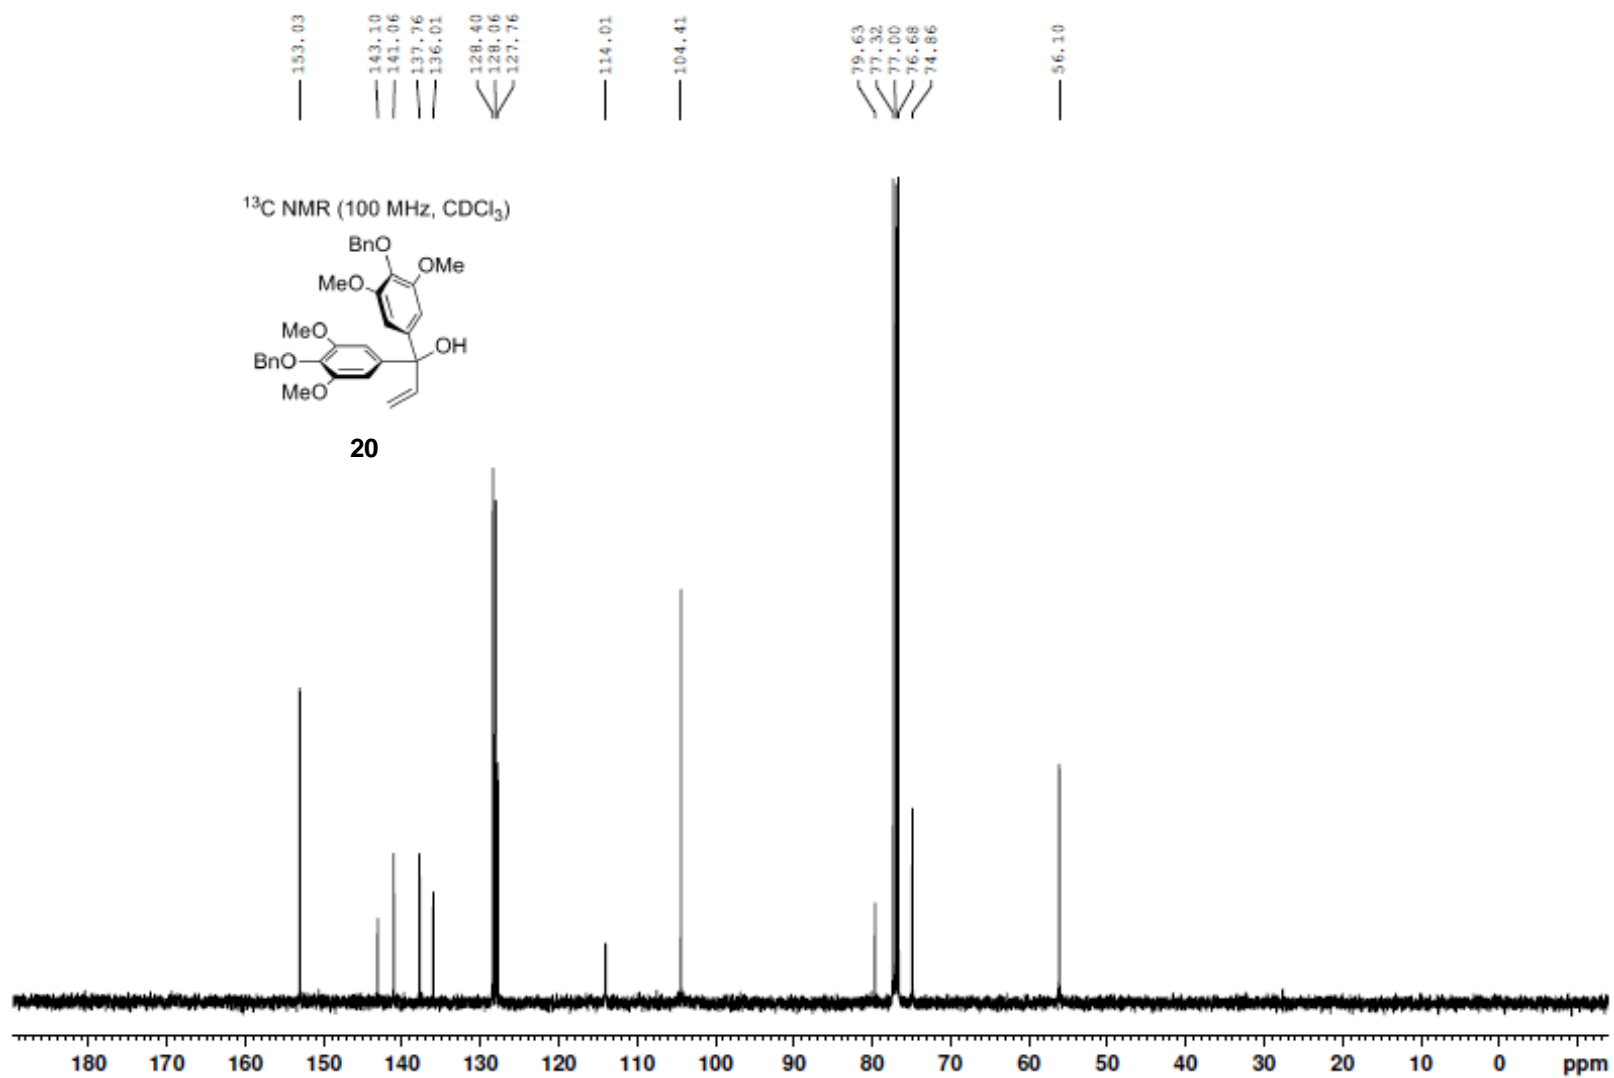

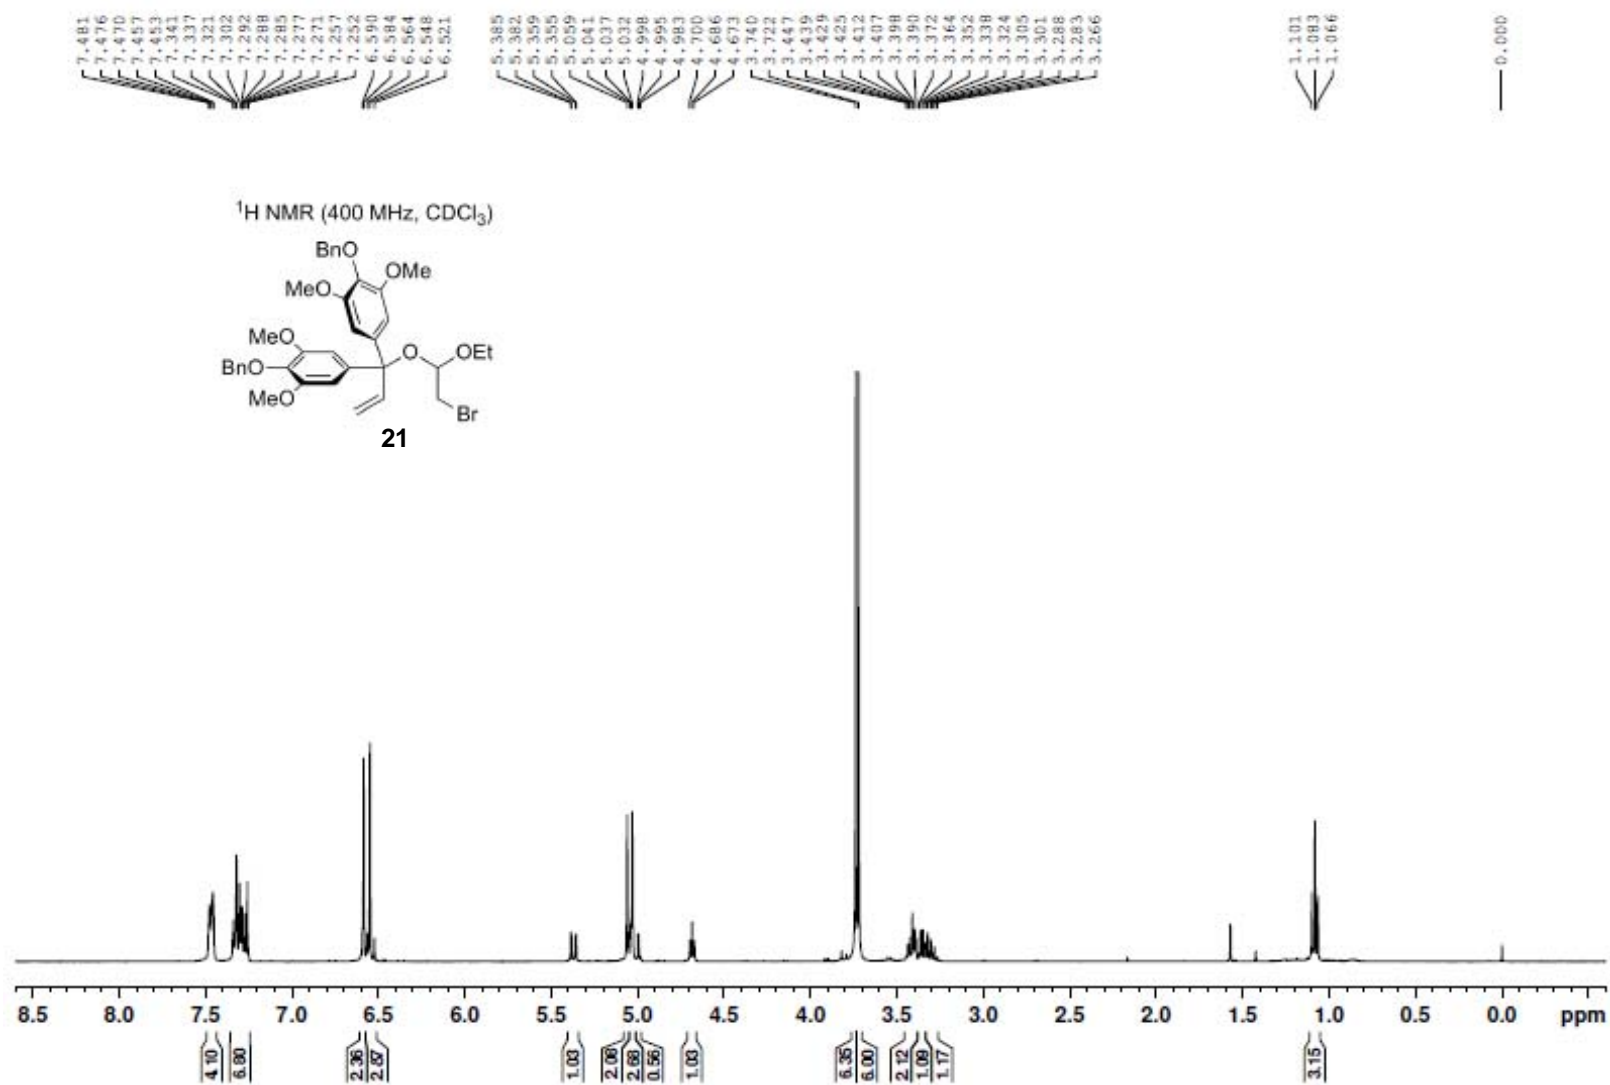

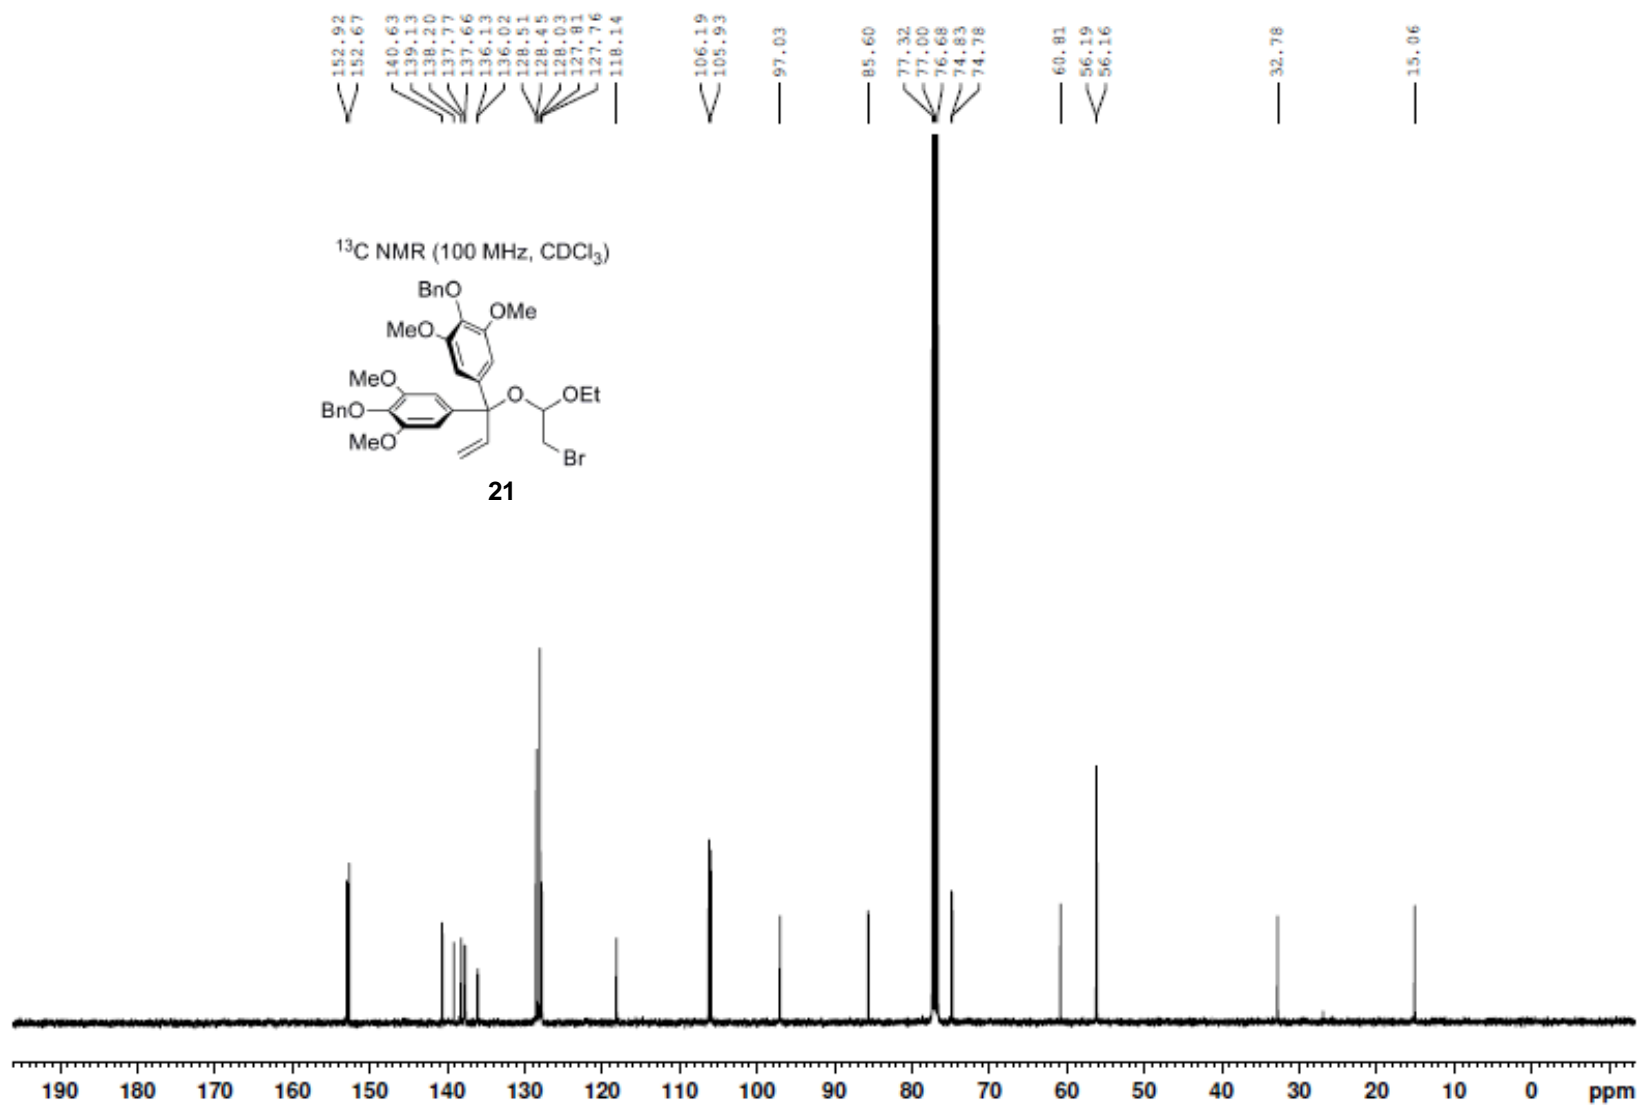

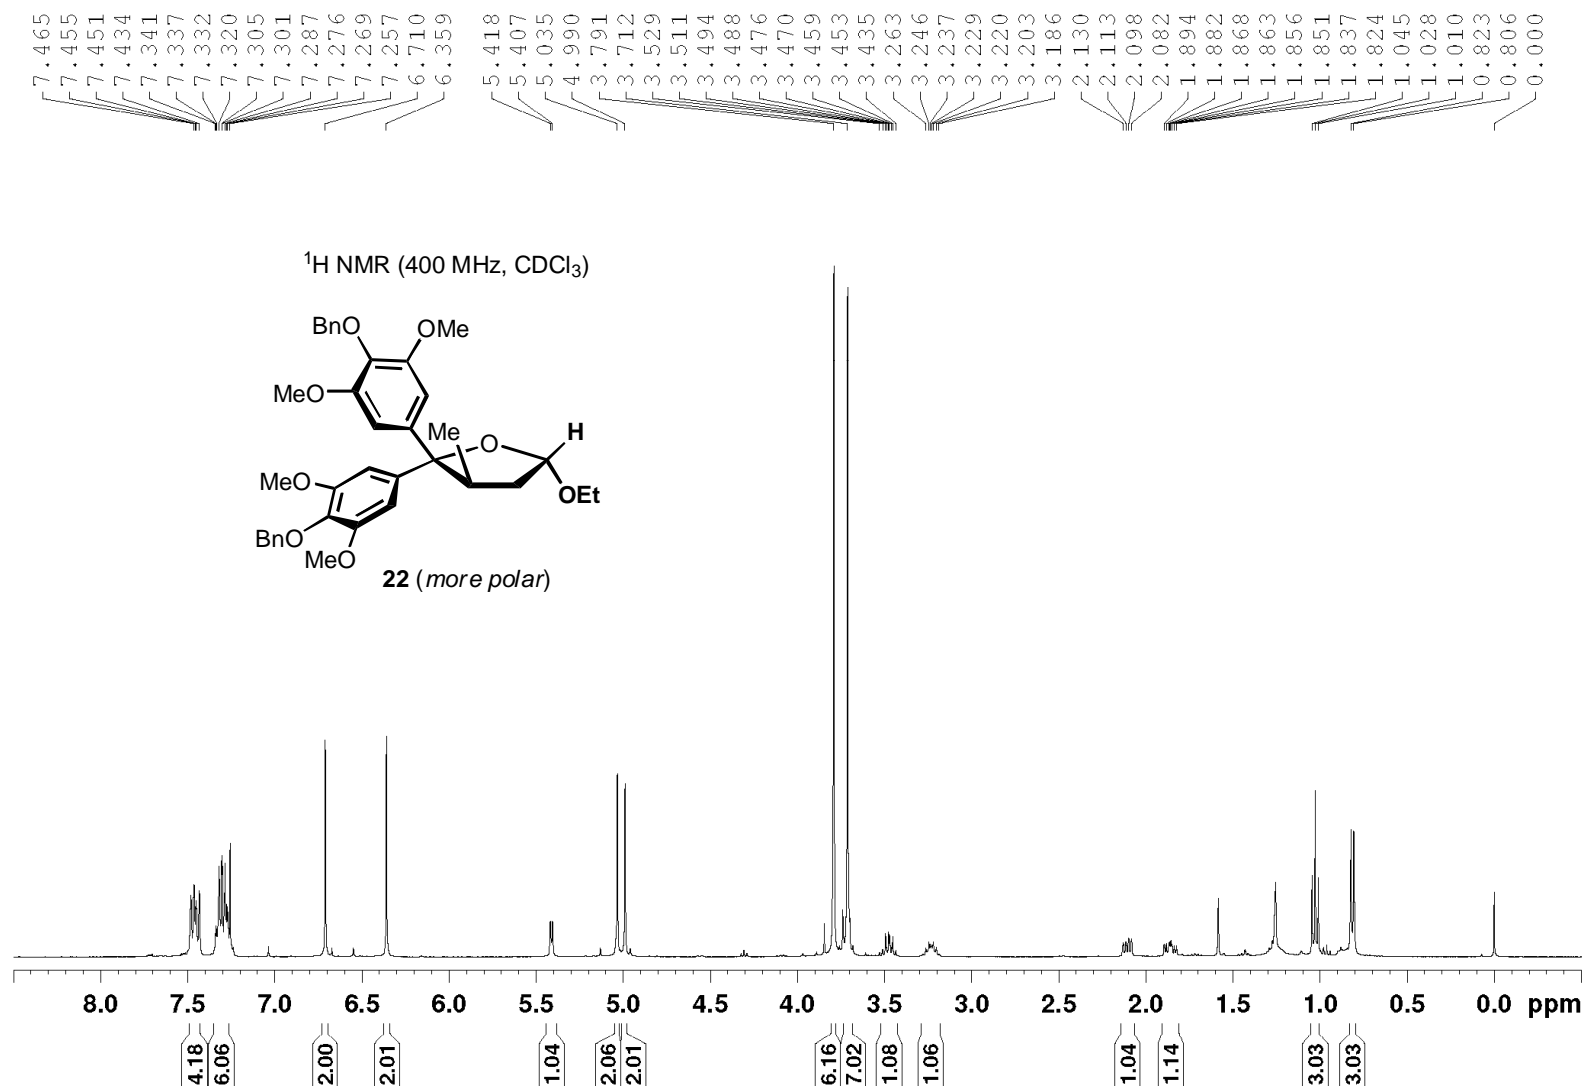

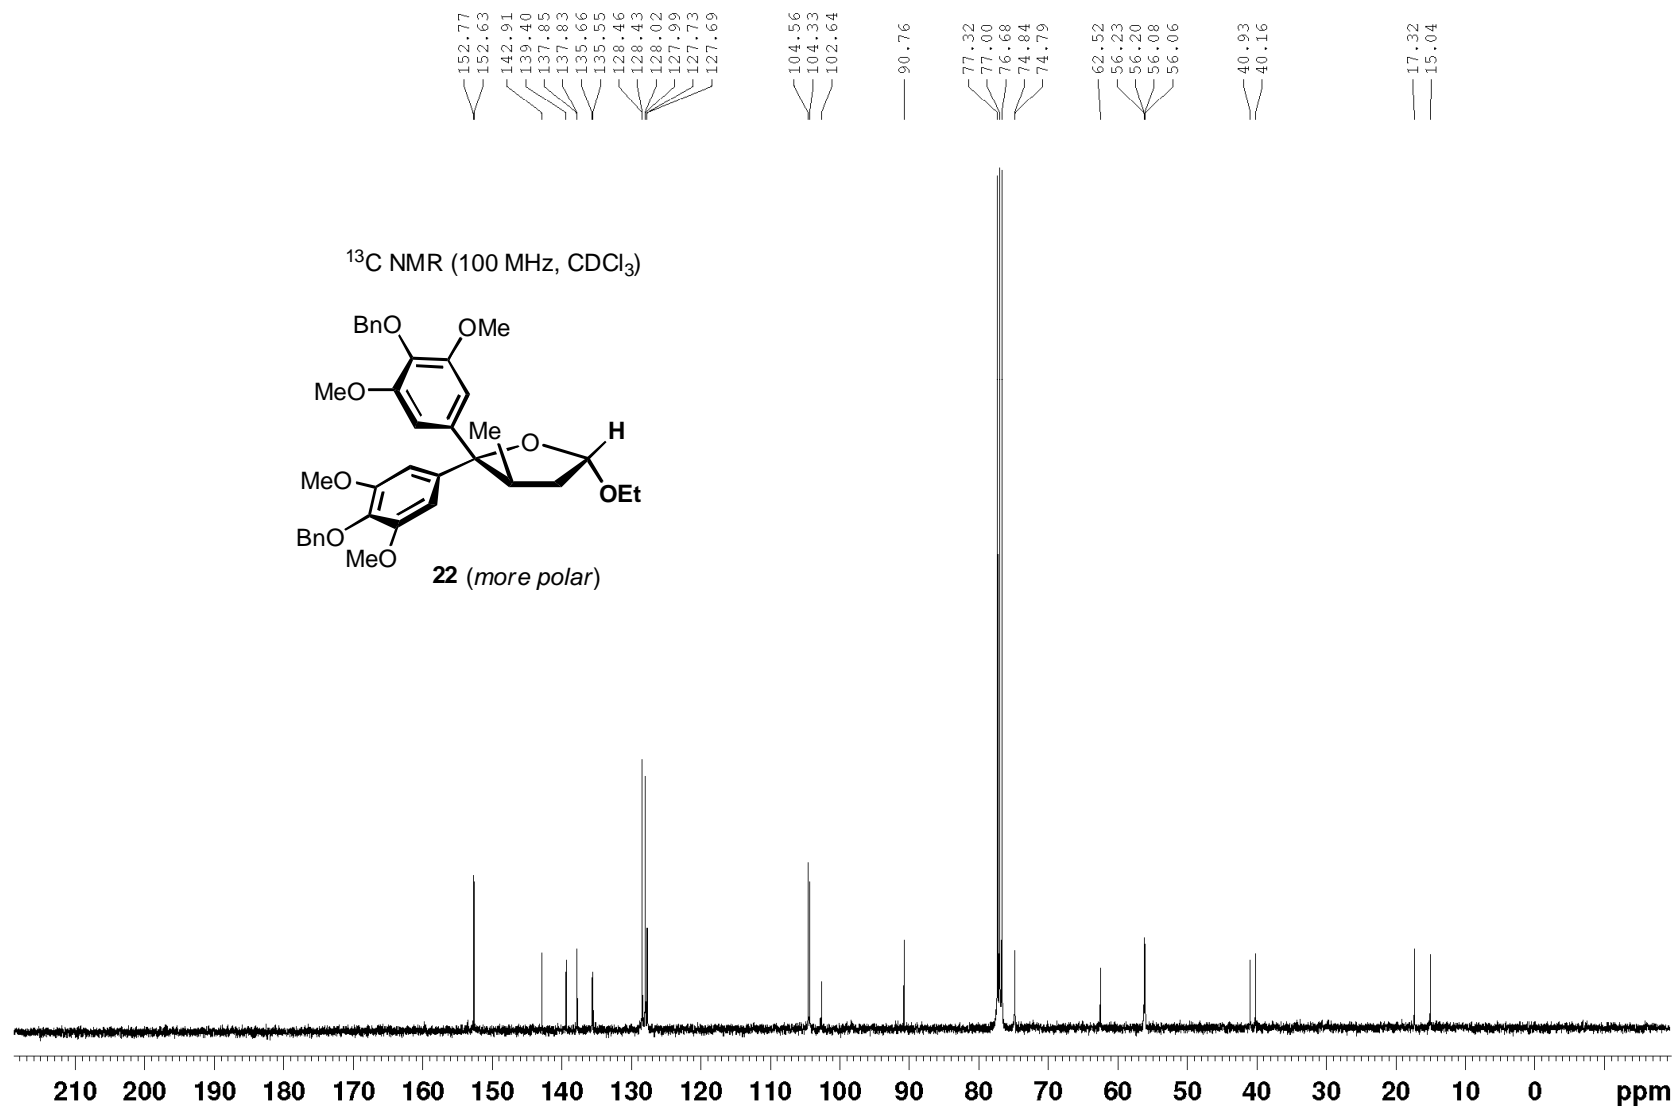



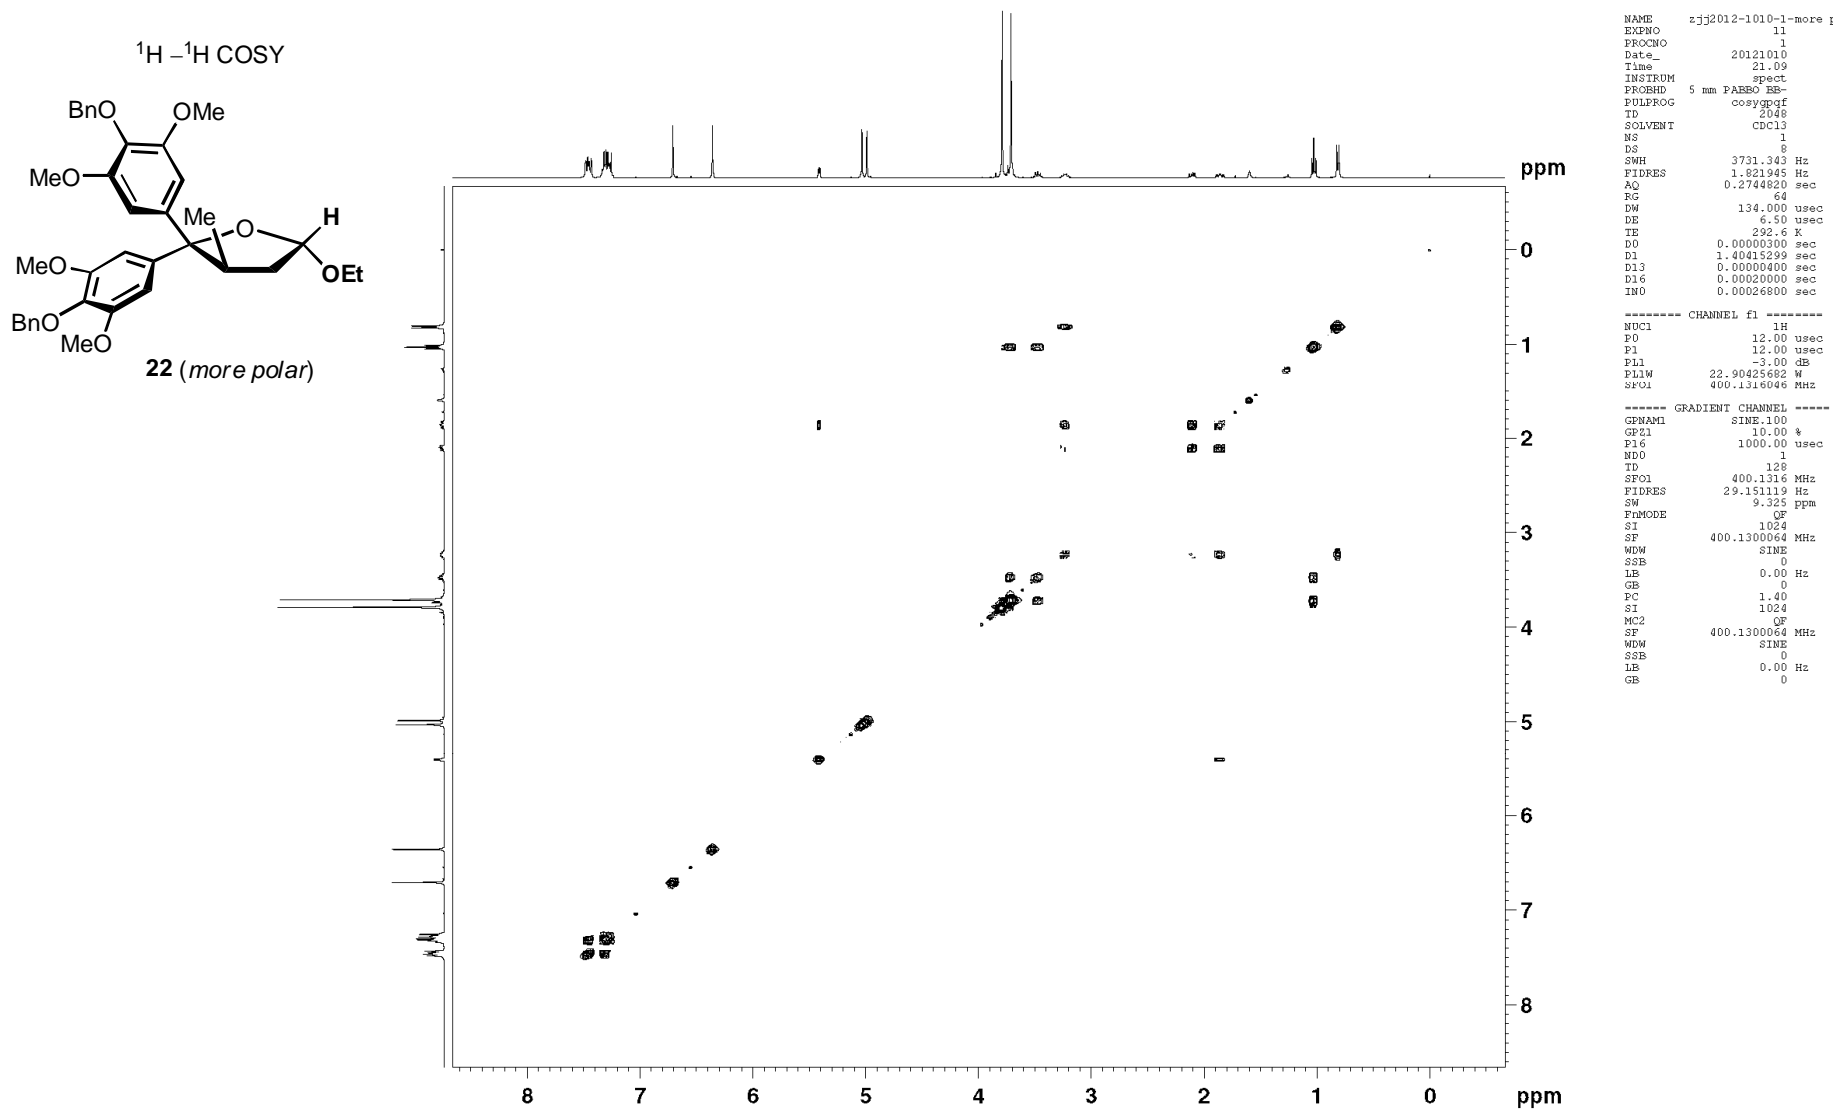

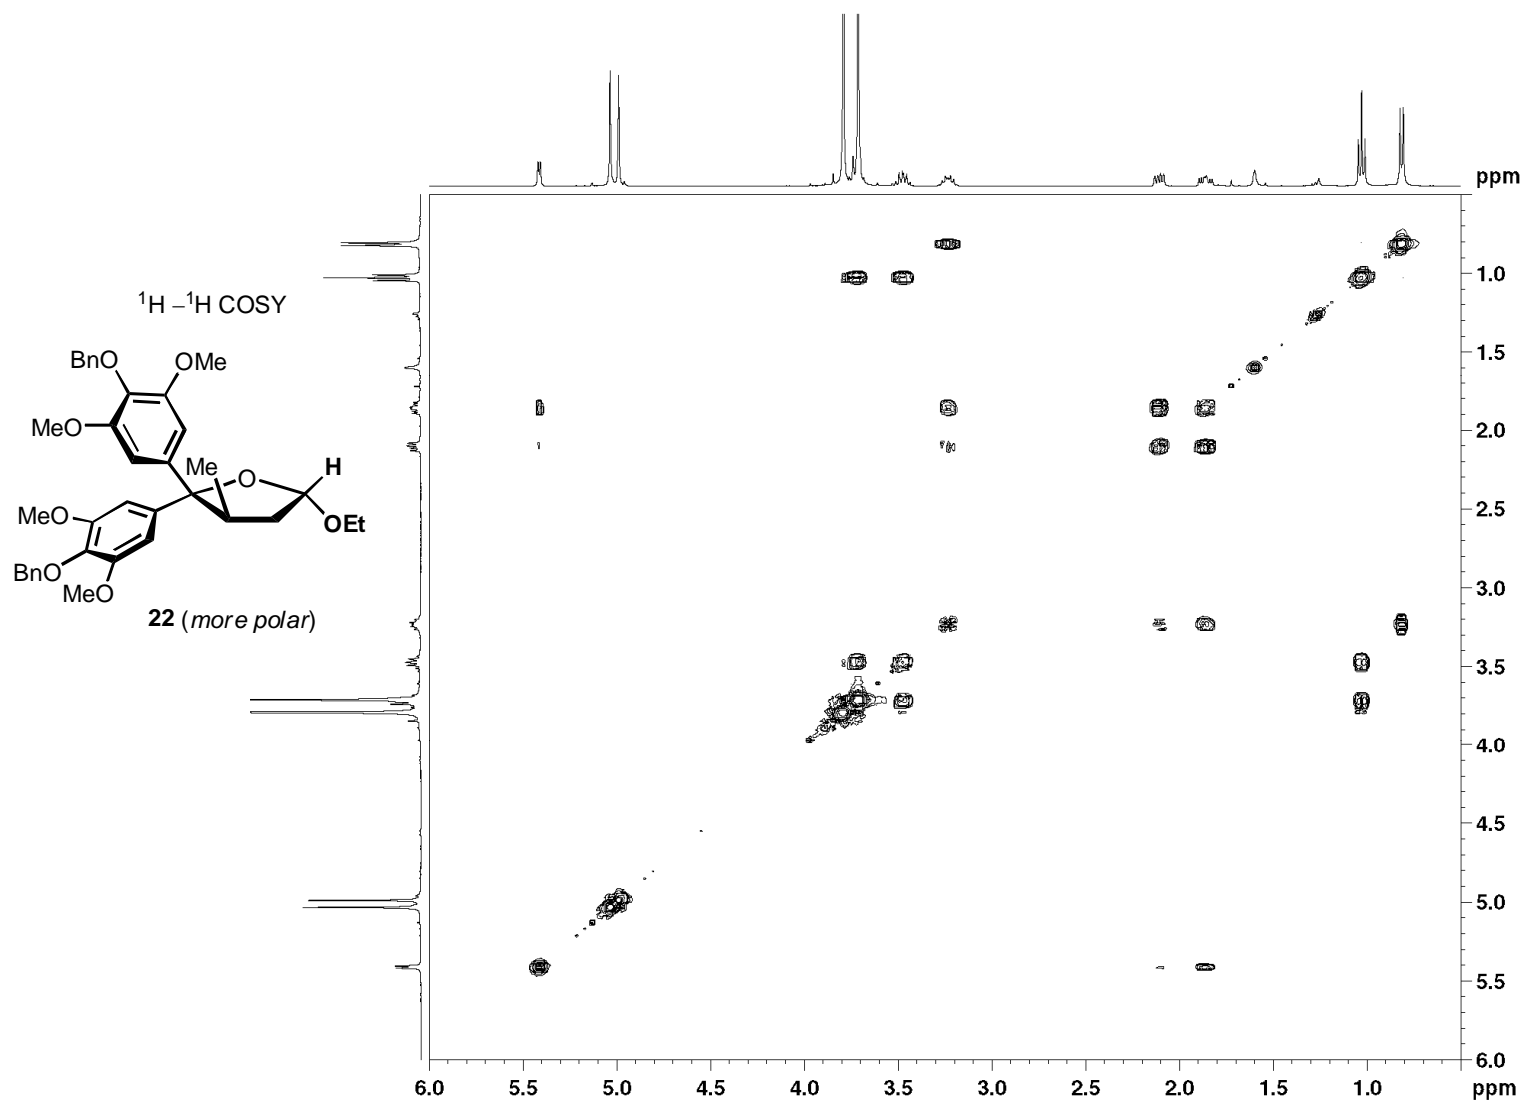

```
NAME zjj2012-1010-1-more polar
EXPNO 11
PROCNO 1
Date_ 20121010
Time 21.09
INSTRUM spect
PROBHD 5 mm PABBO BB-
PULPROG cosygpcqf
TD 2048
SOLVENT CDCl3
NS 1
DS 8
SWH 3731.343 Hz
FIDRES 1.821945 Hz
AQ 0.2744820 sec
RG 64
DM 134.000 usec
DE 6.50 usec
TE 292.6 K
D0 0.00000300 sec
D1 1.40415299 sec
D13 0.00000400 sec
D16 0.00020000 sec
IN0 0.00026800 sec
```

```
----- CHANNEL f1 -----
NUC1 1H
FO 12.00 usec
P1 12.00 usec
PL1 -3.00 dB
PL1W 22.90423682 W
SFO1 400.1316046 MHz
```

```
----- GRADIENT CHANNEL -----
GPM1 SINE 100
GP21 10.00 %
P16 1000.00 usec
ND0 1
TD 128
SFO1 400.1316 MHz
FIDRES 29.151119 Hz
SW 9.325 ppm
FMODE GF
SI 1024
SF 400.1300064 MHz
WDW SINE
SSE 0
LB 0.00 Hz
GB 0
FC 1.40
SI 1024
MC2 GF
SF 400.1300064 MHz
WDW SINE
SSE 0
LB 0.00 Hz
GB 0
```

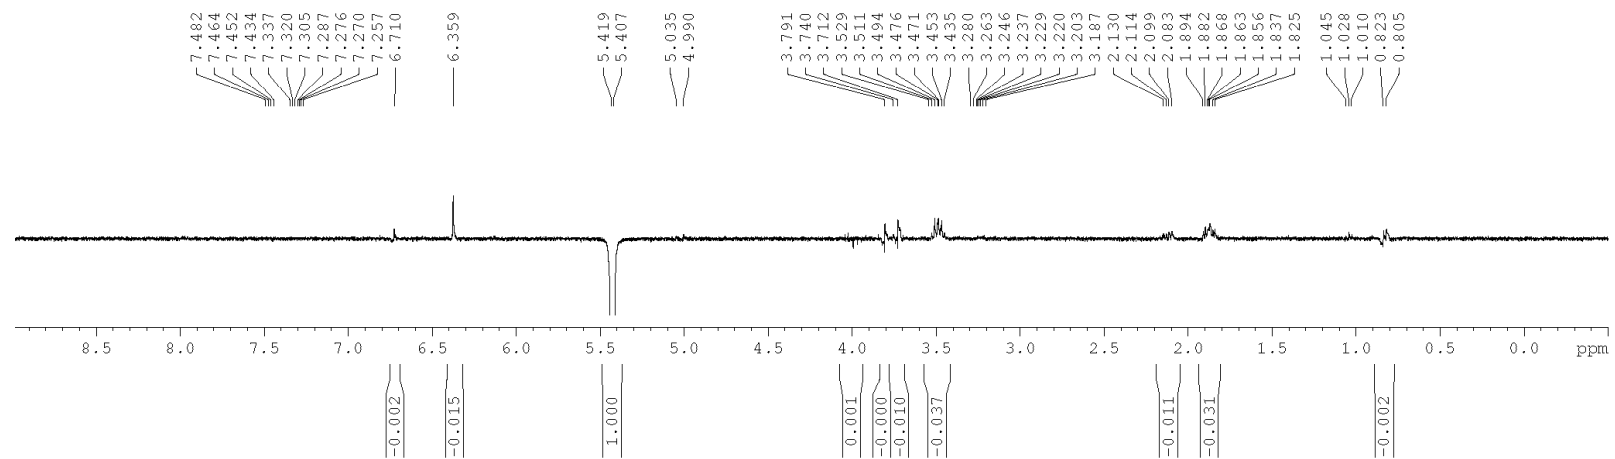

NOE of **22** (more polar)

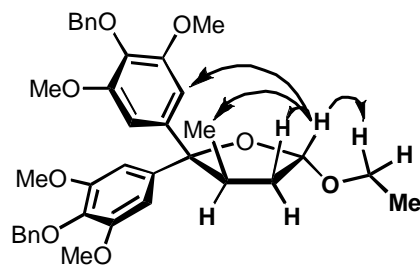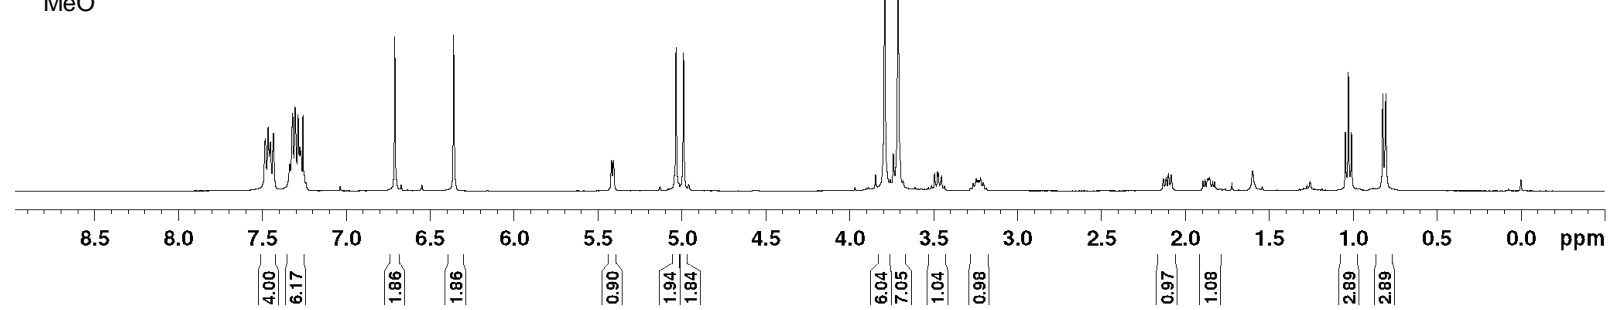

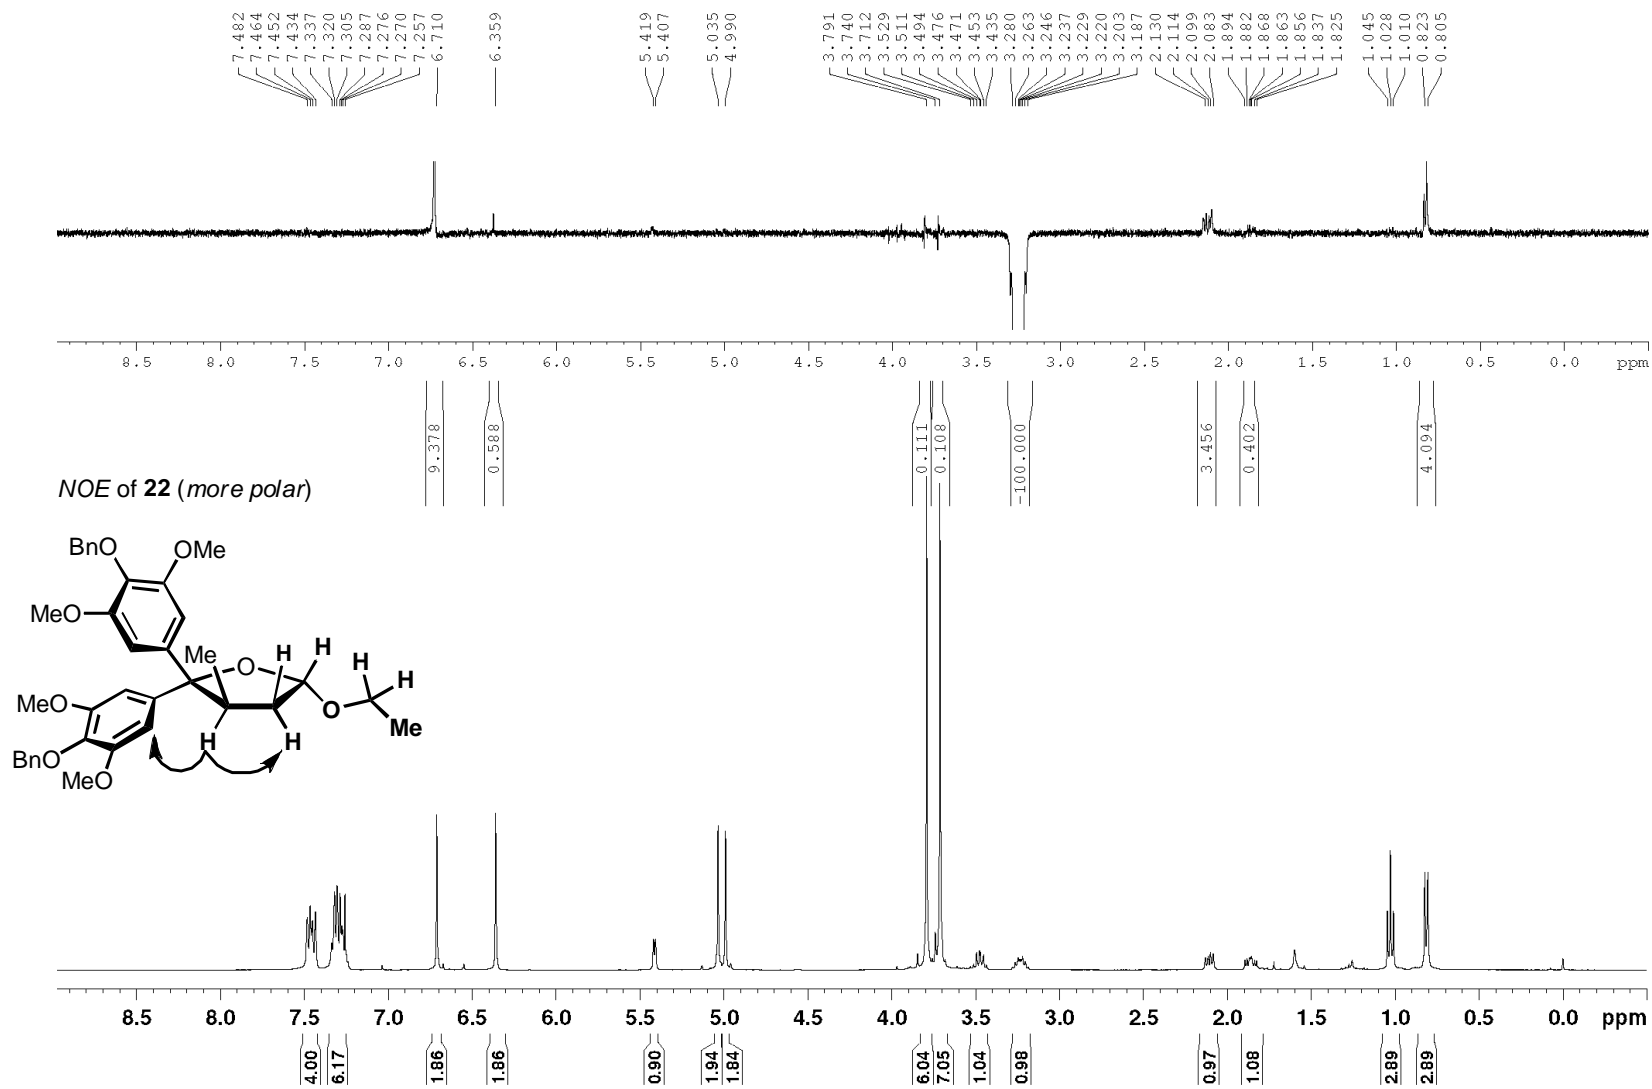

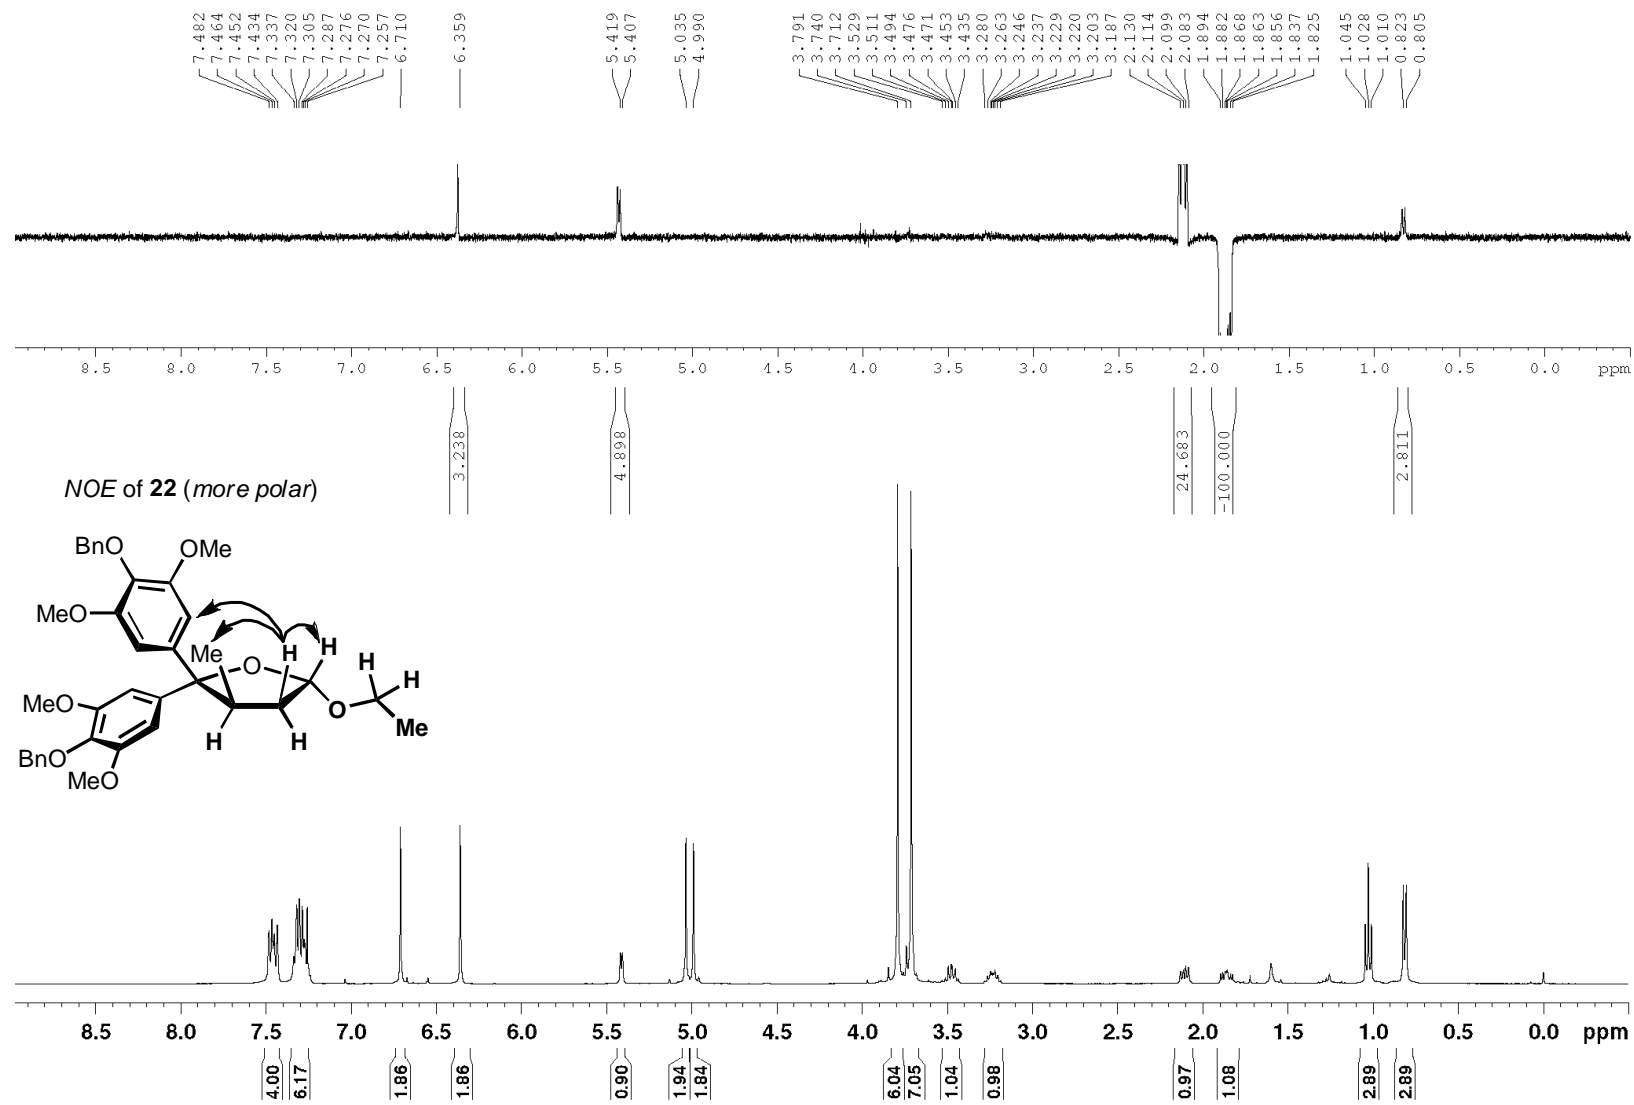

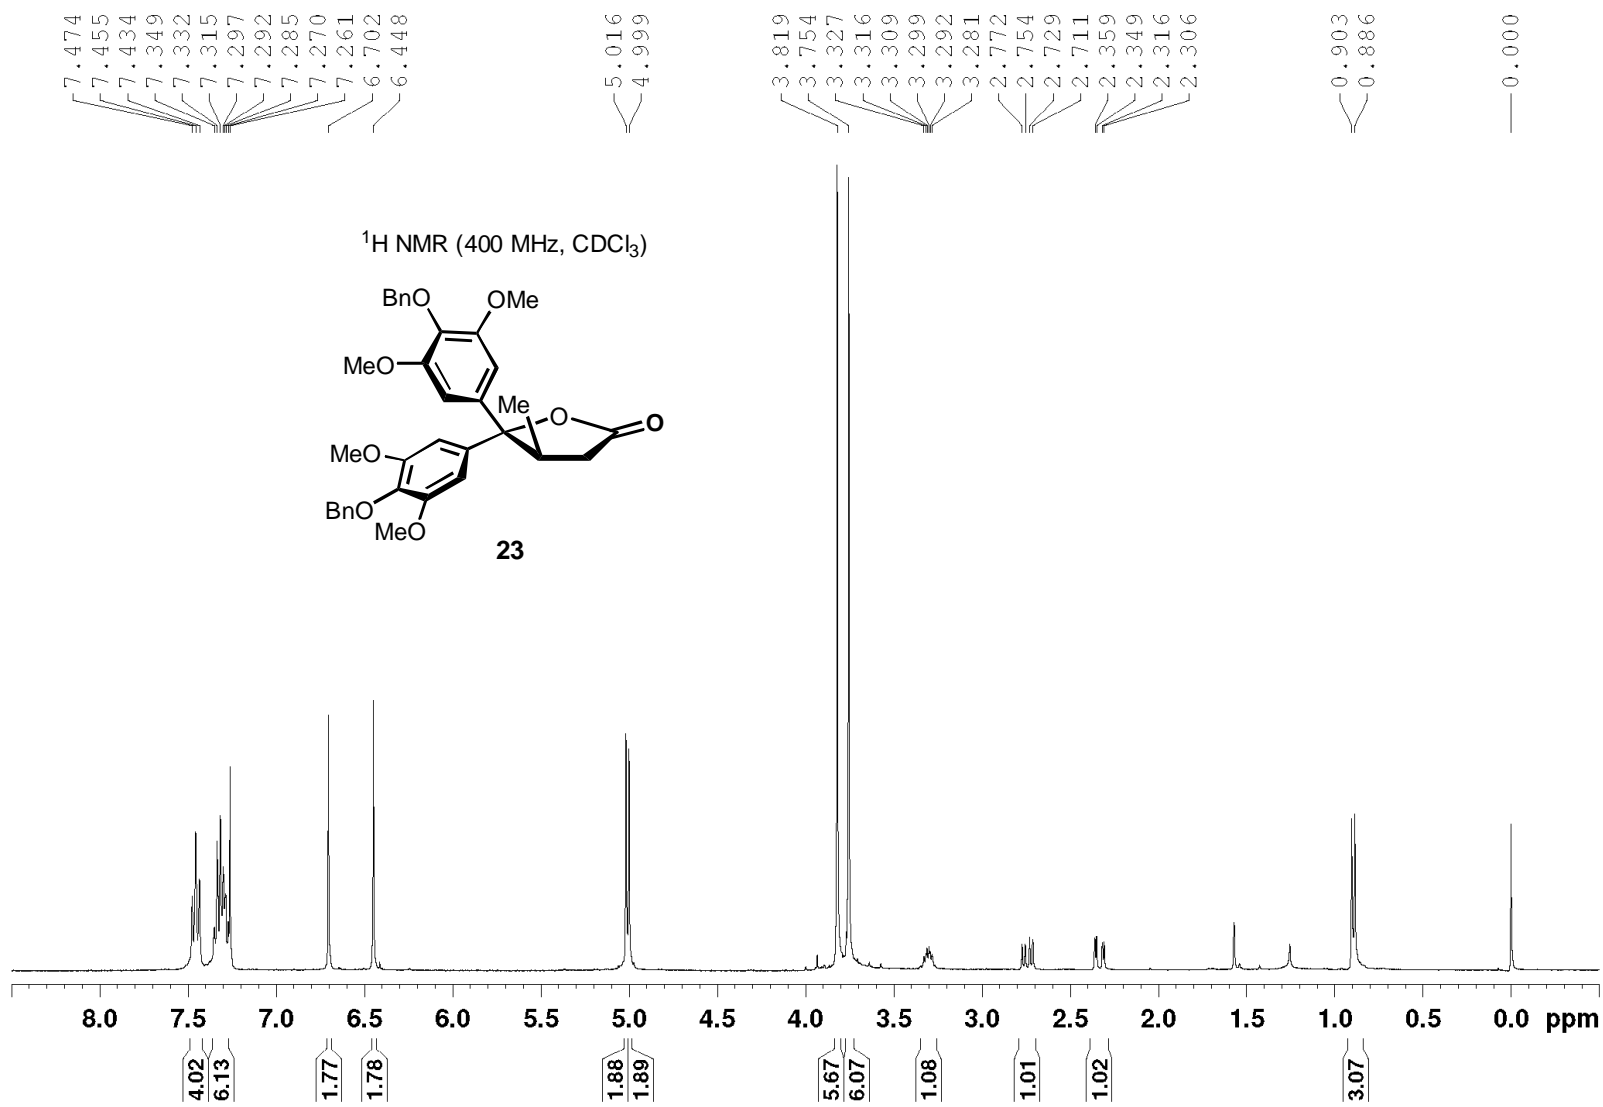

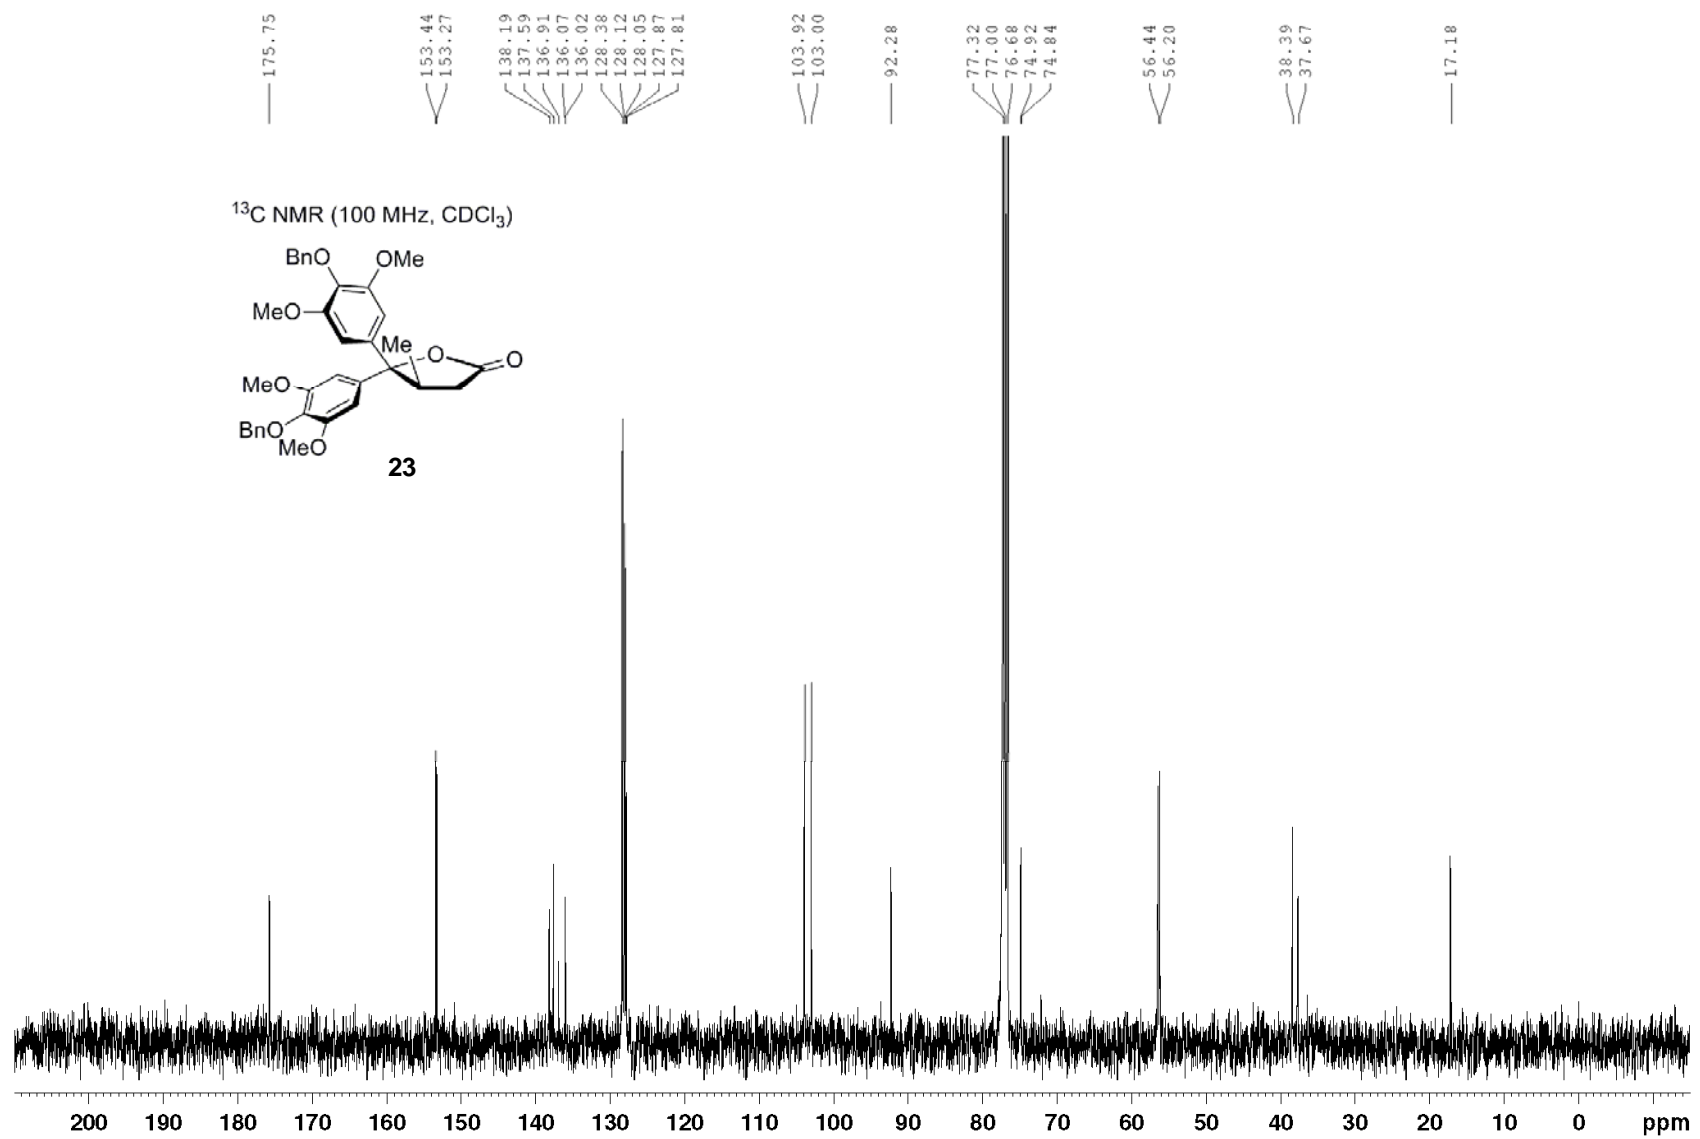

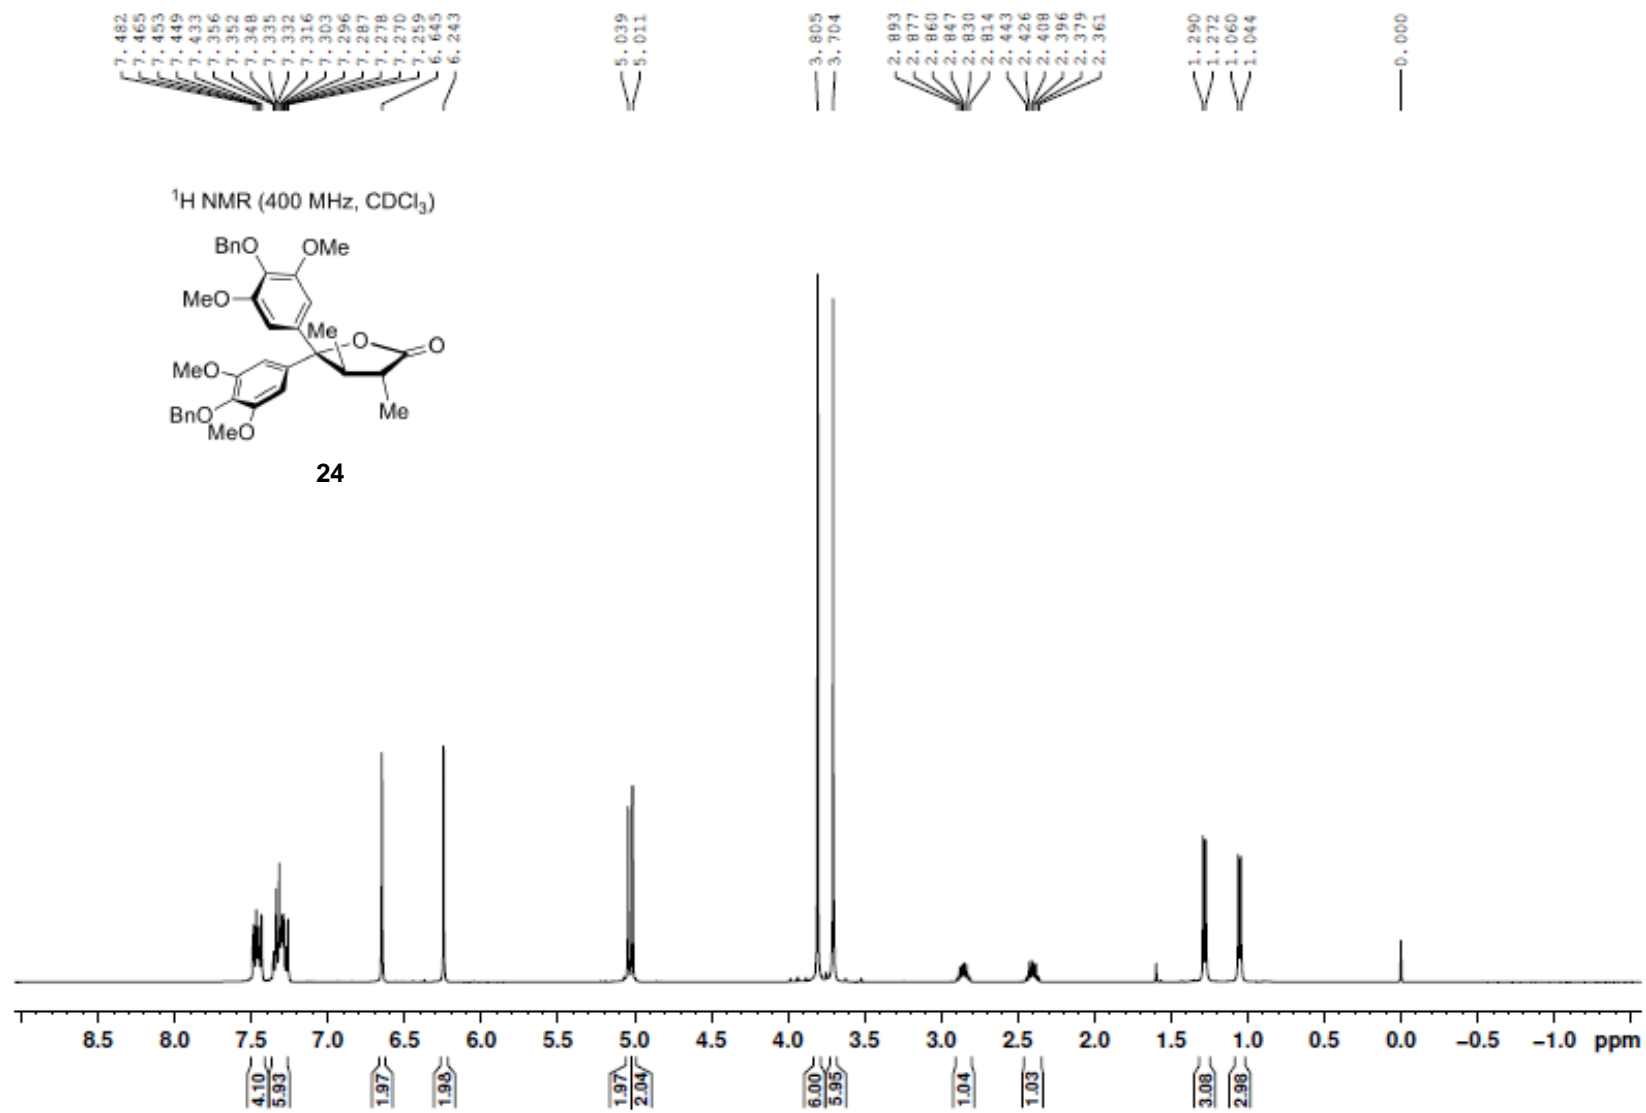



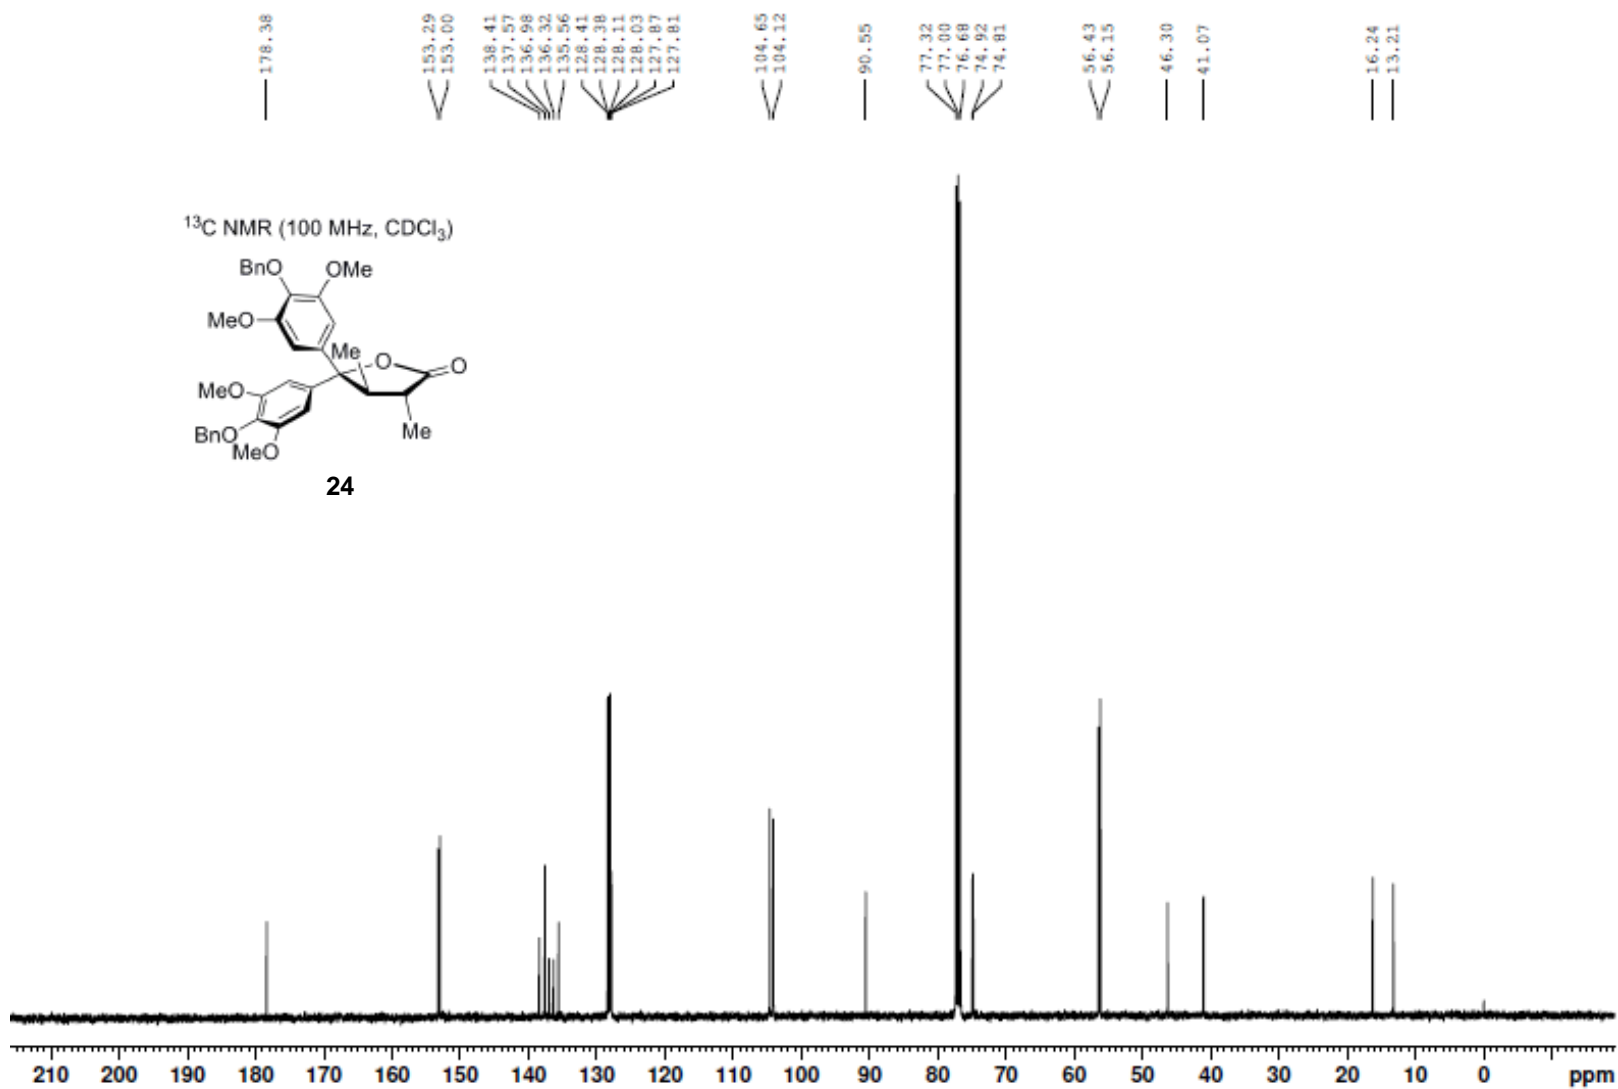

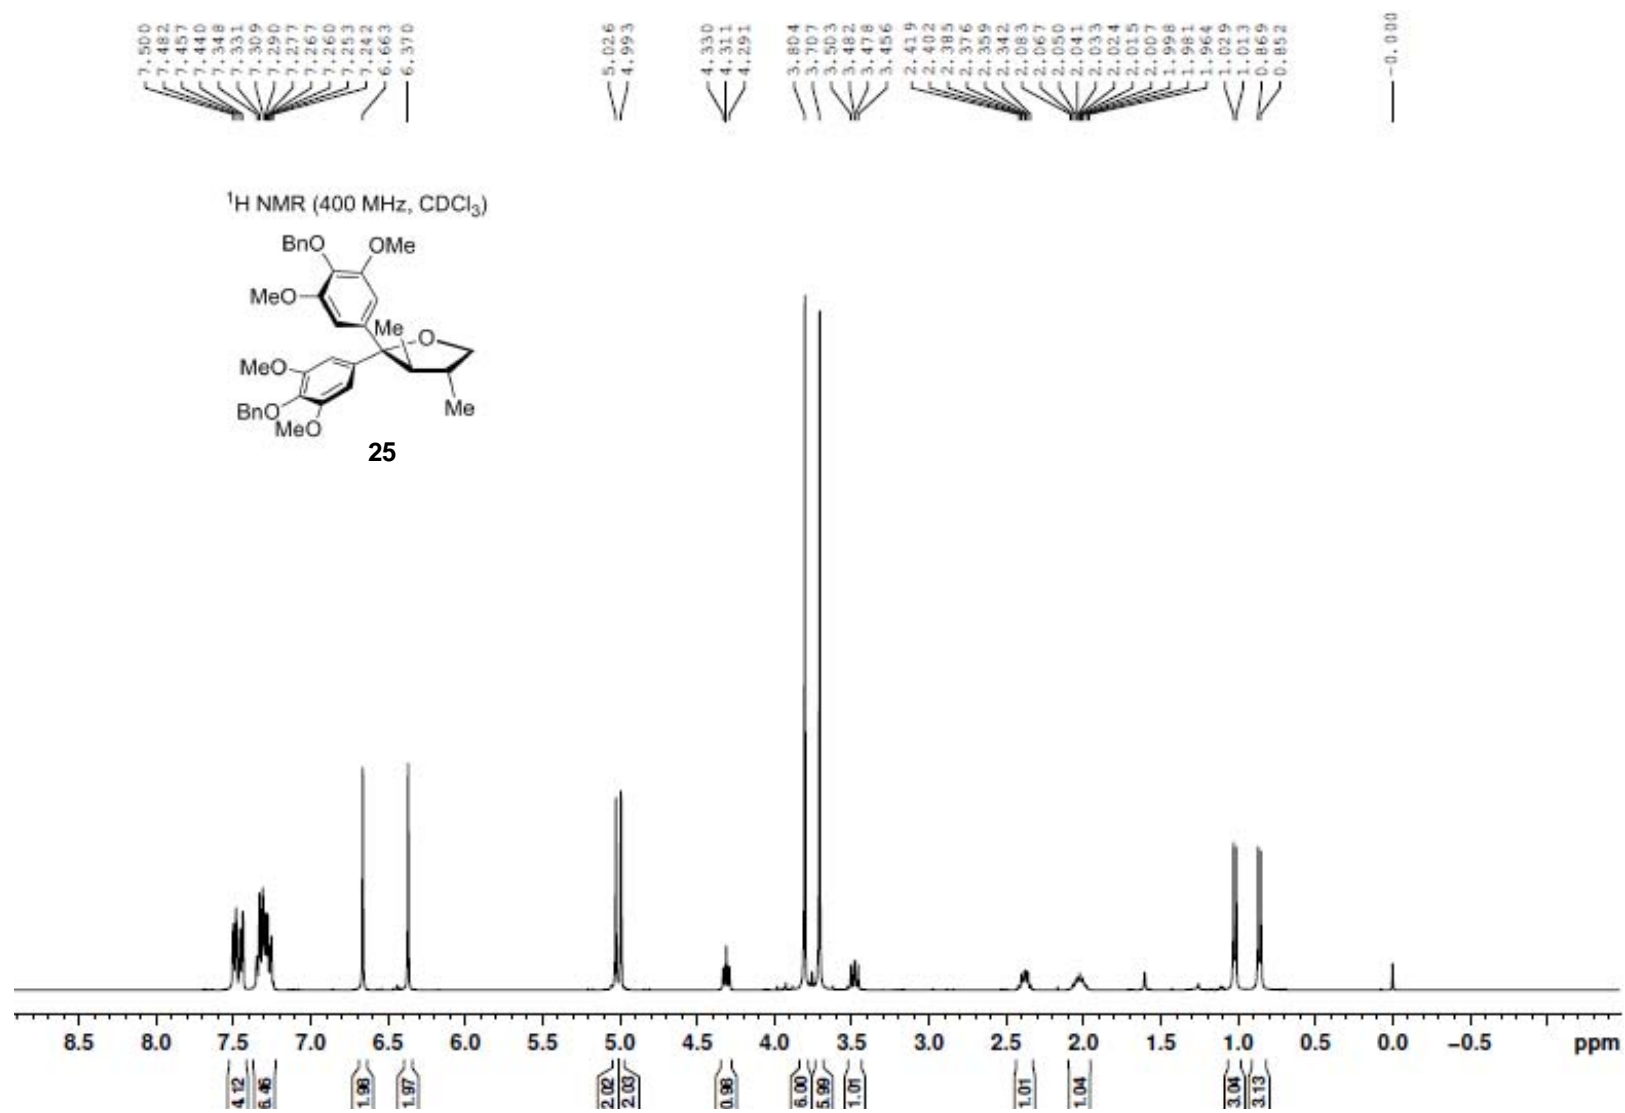

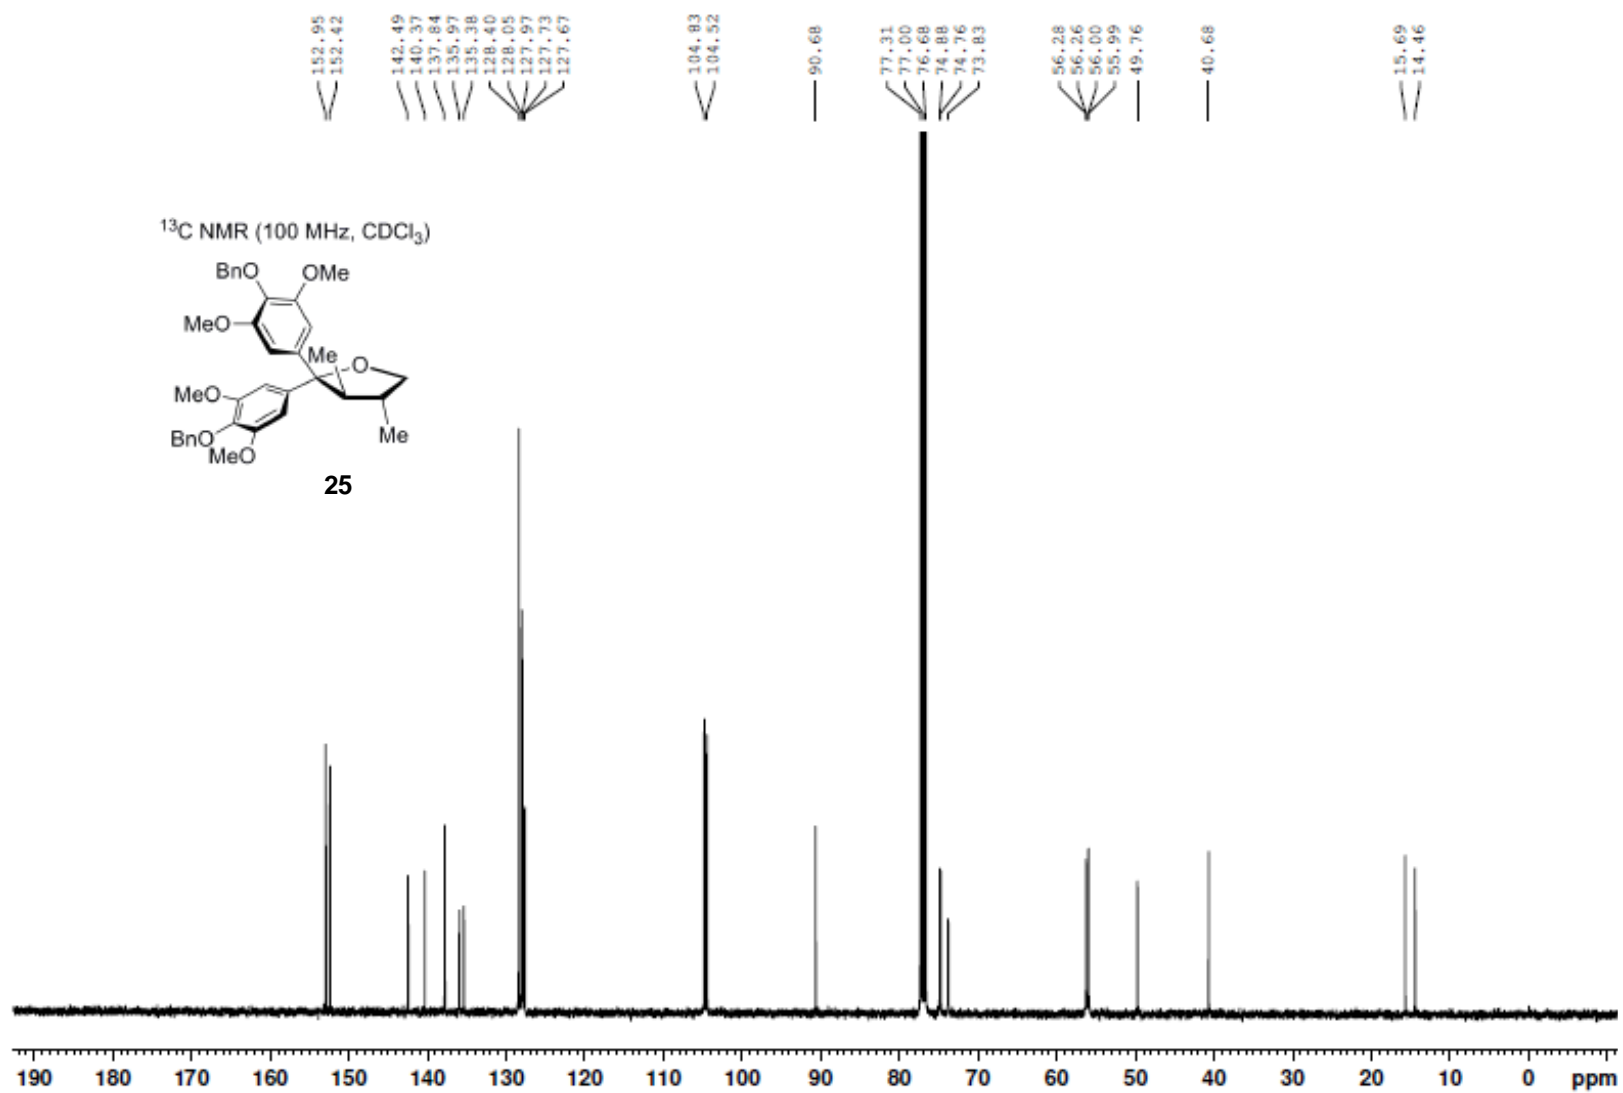

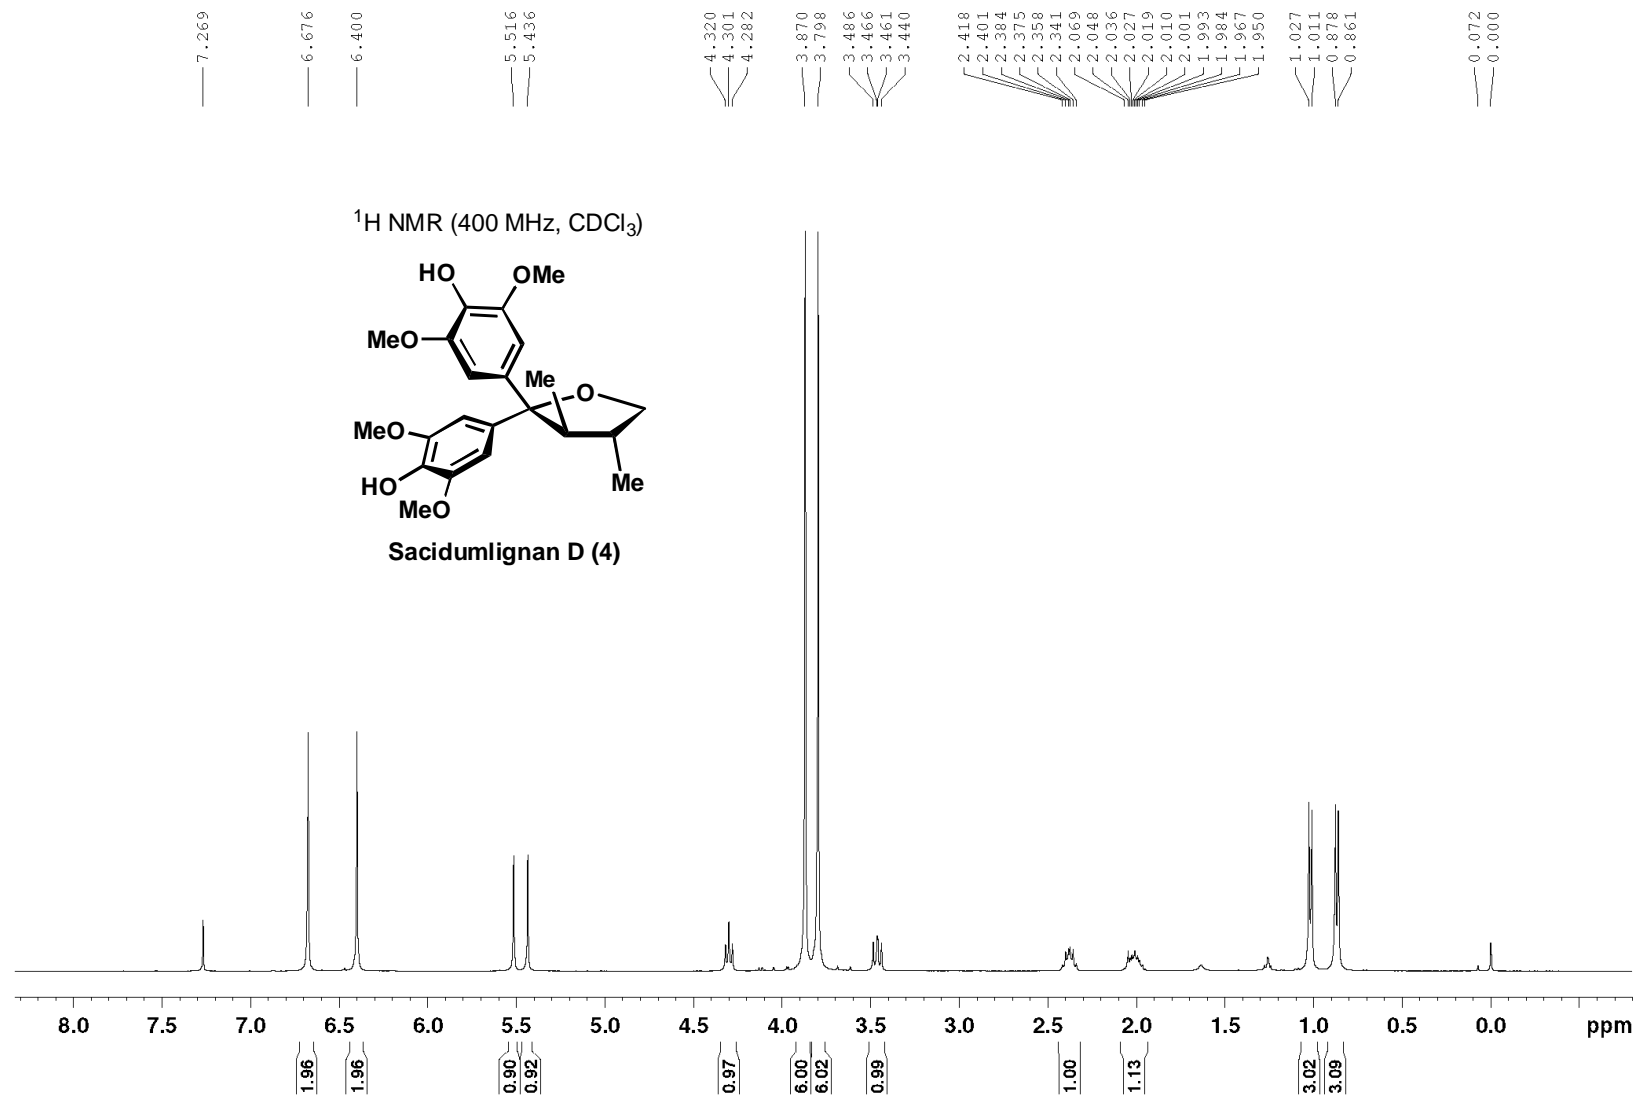

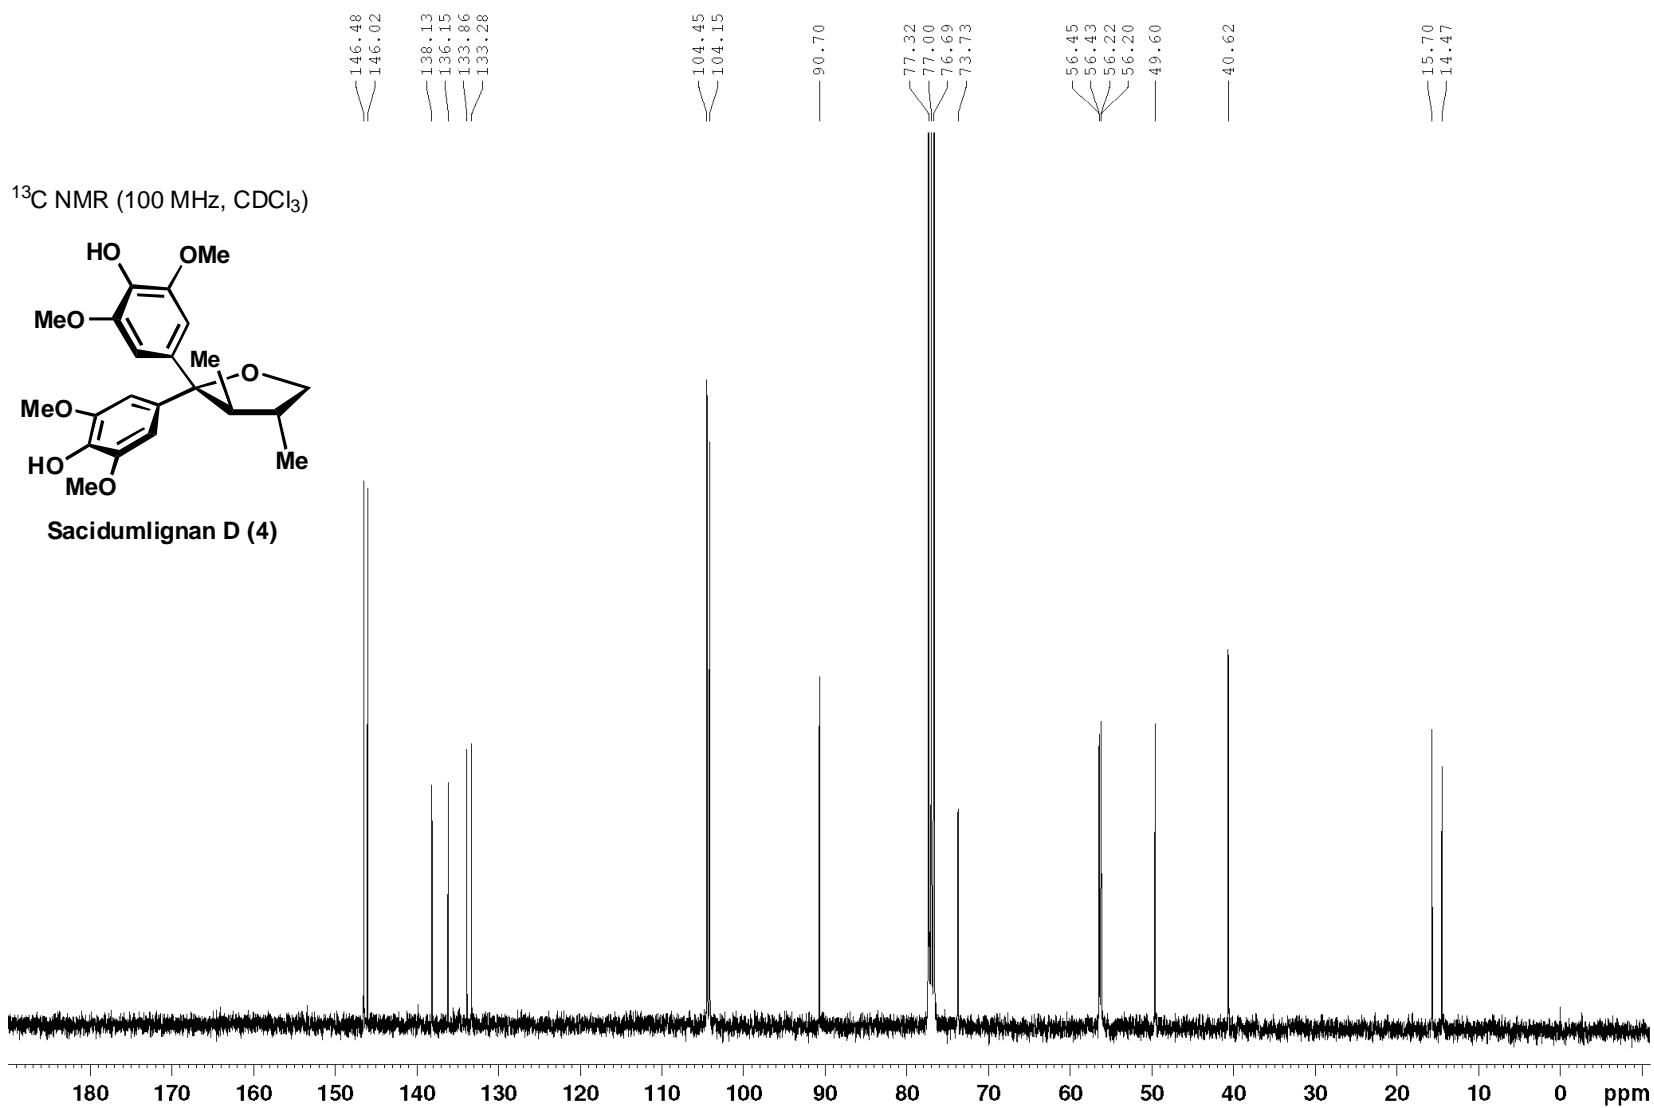

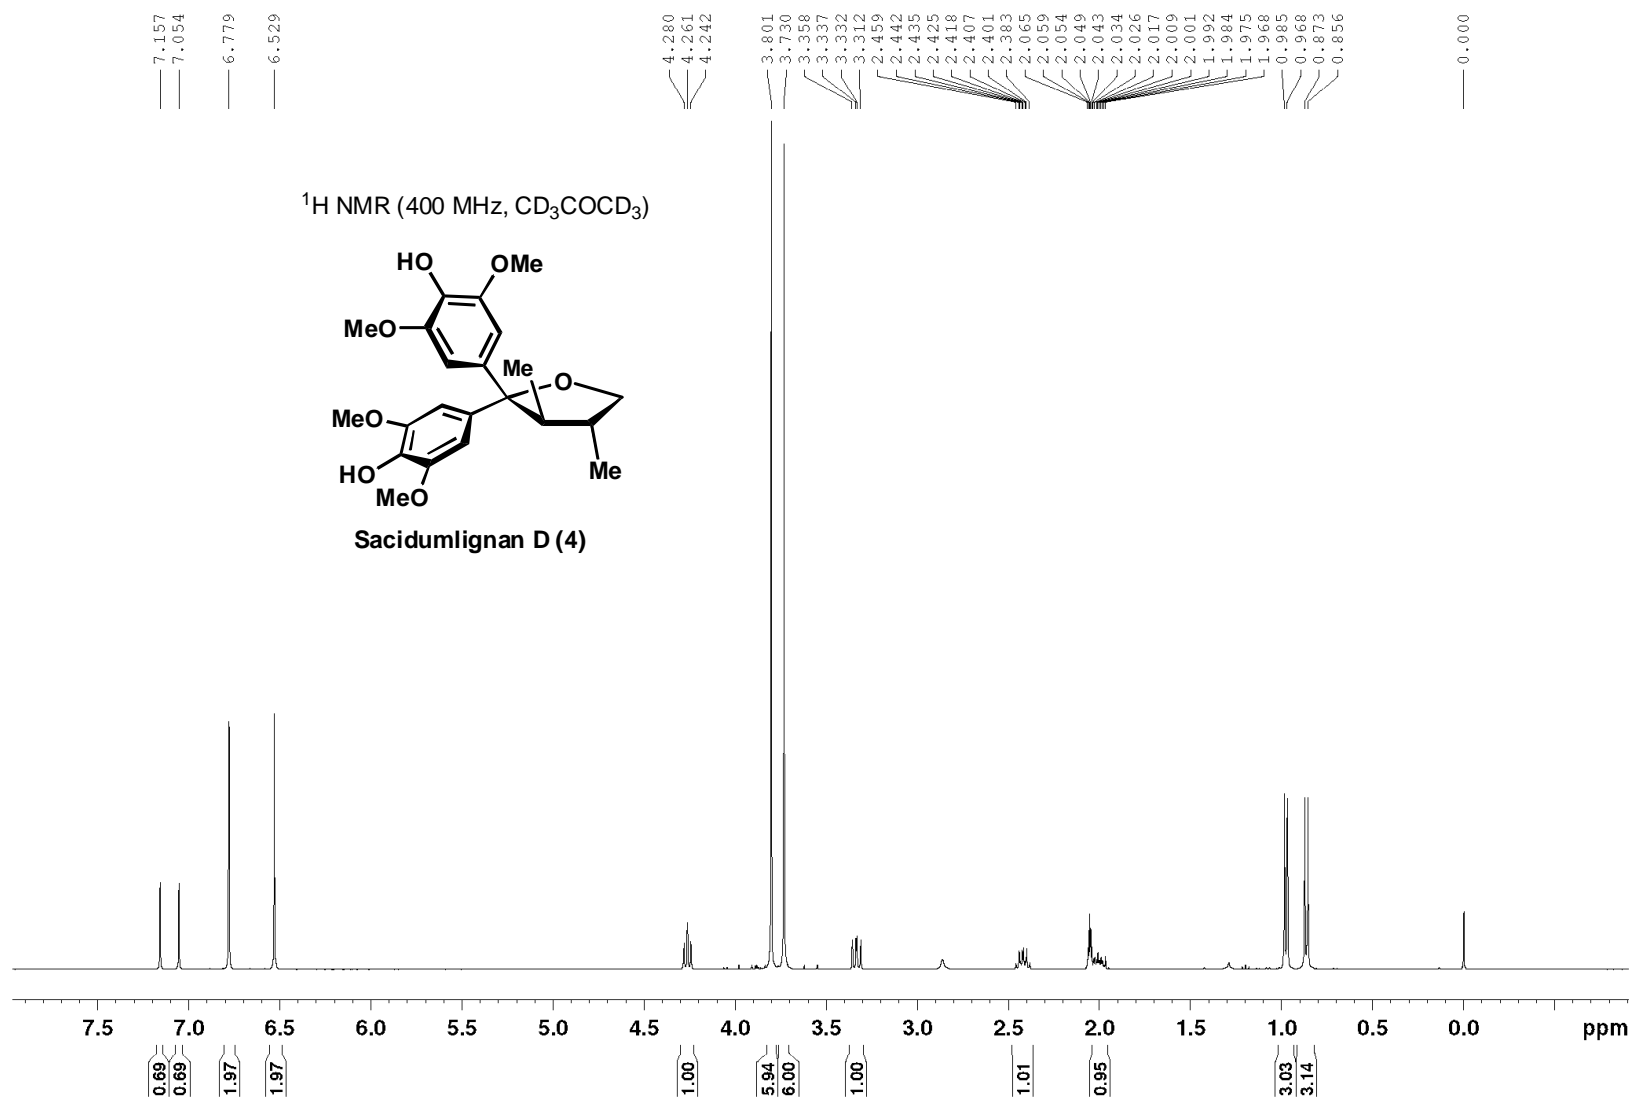

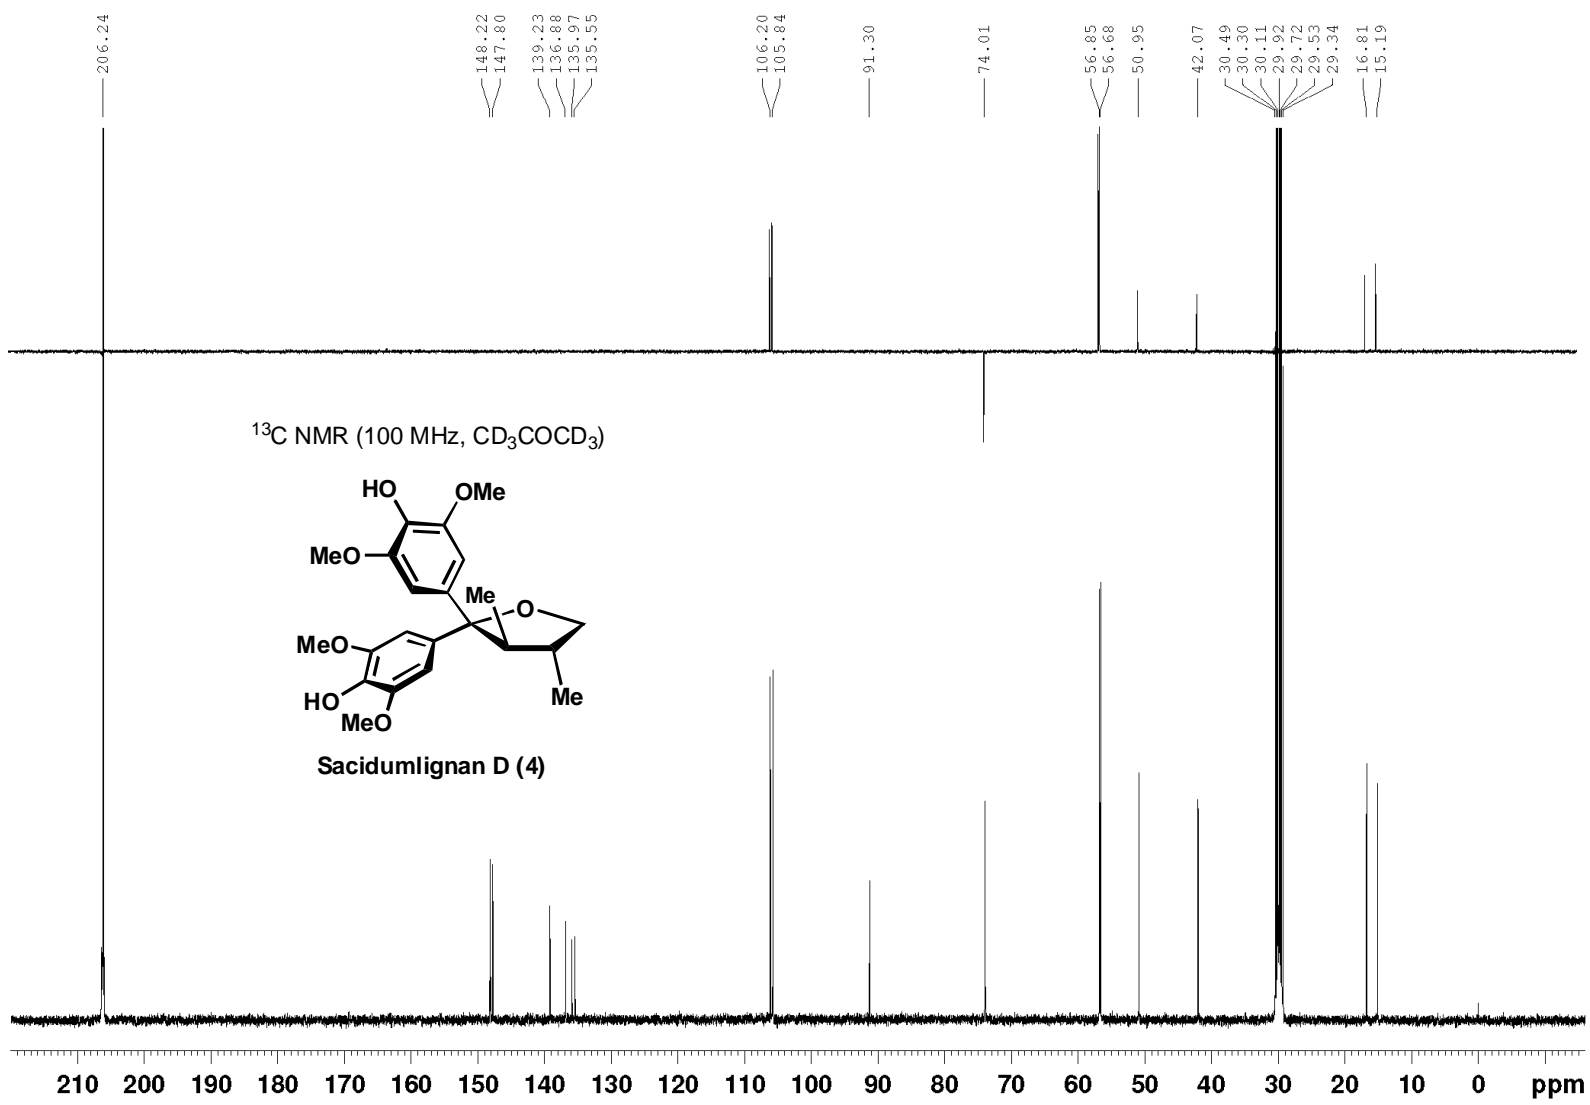

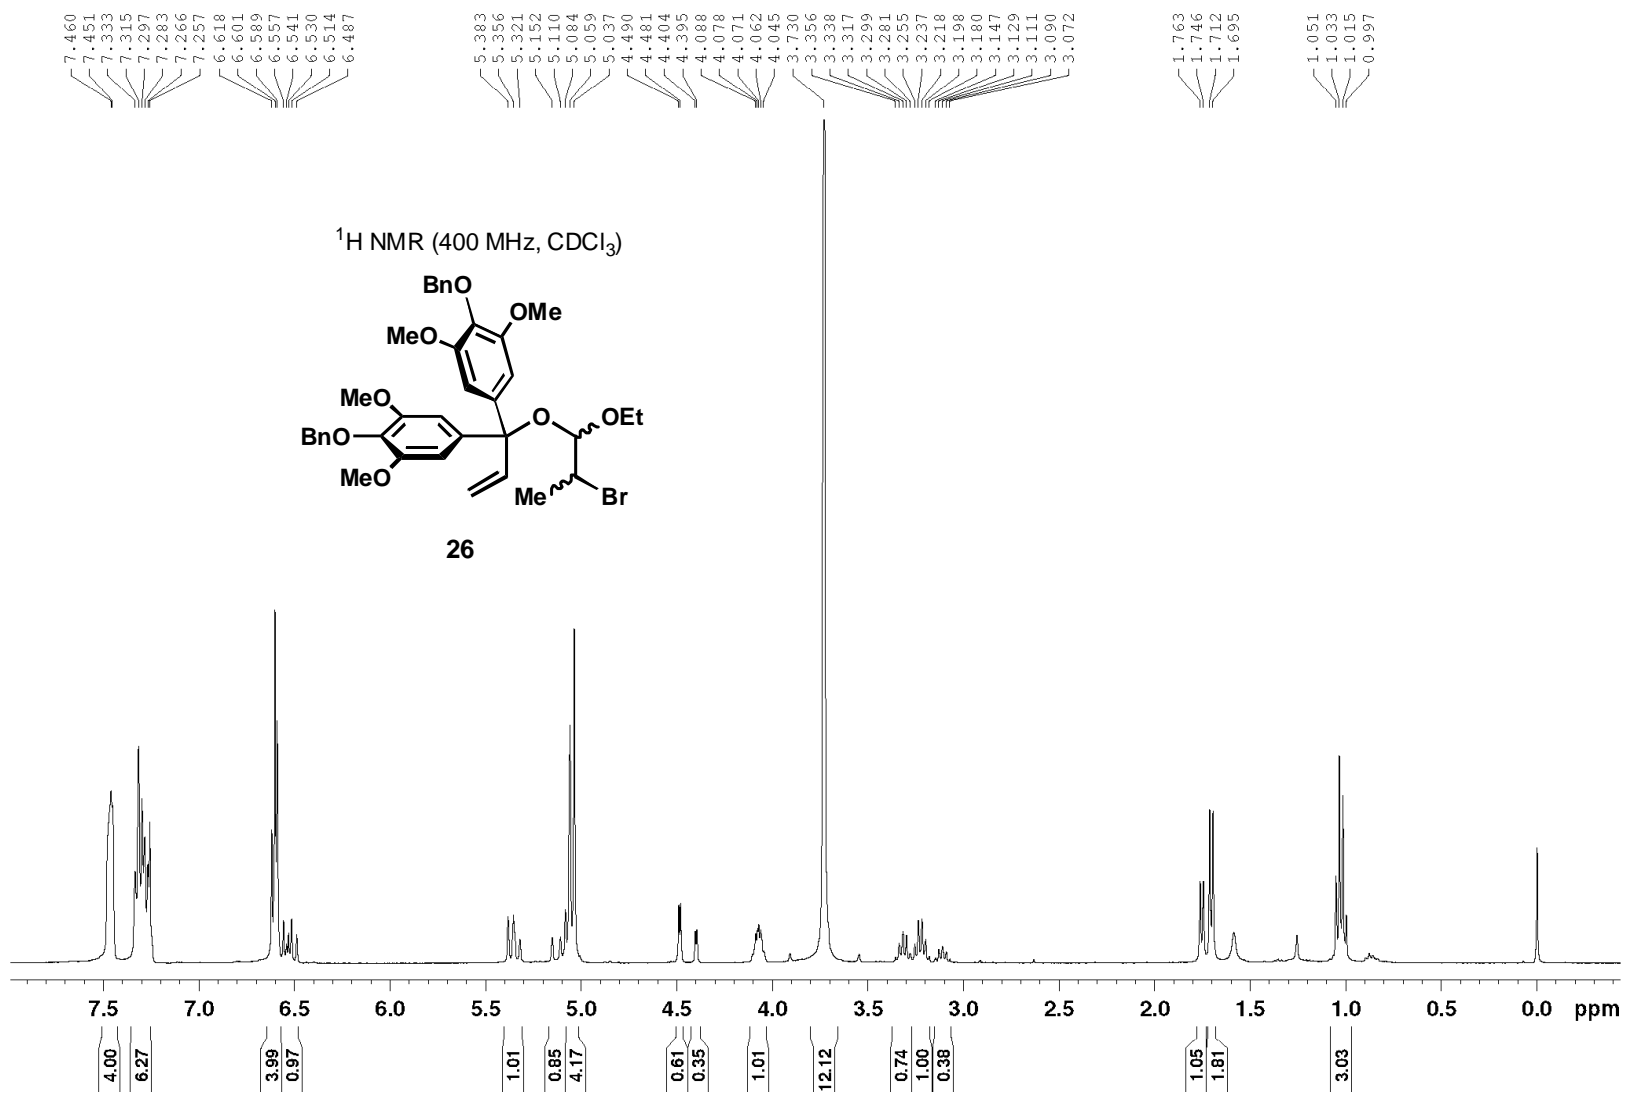



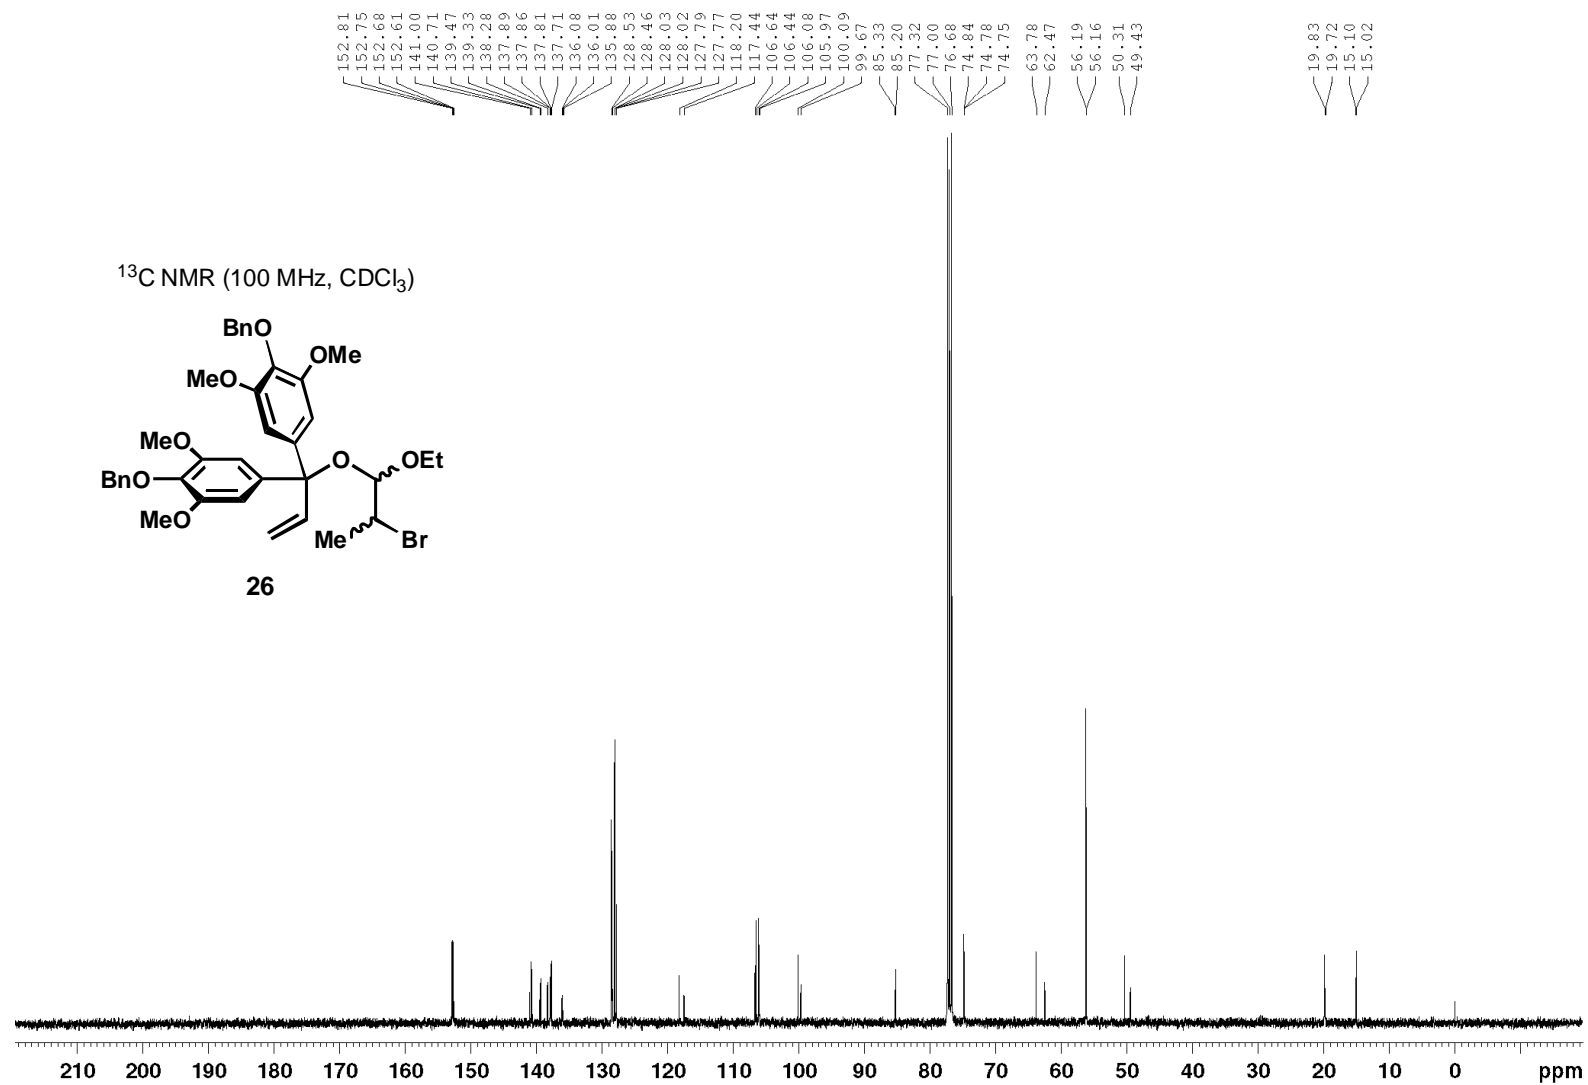

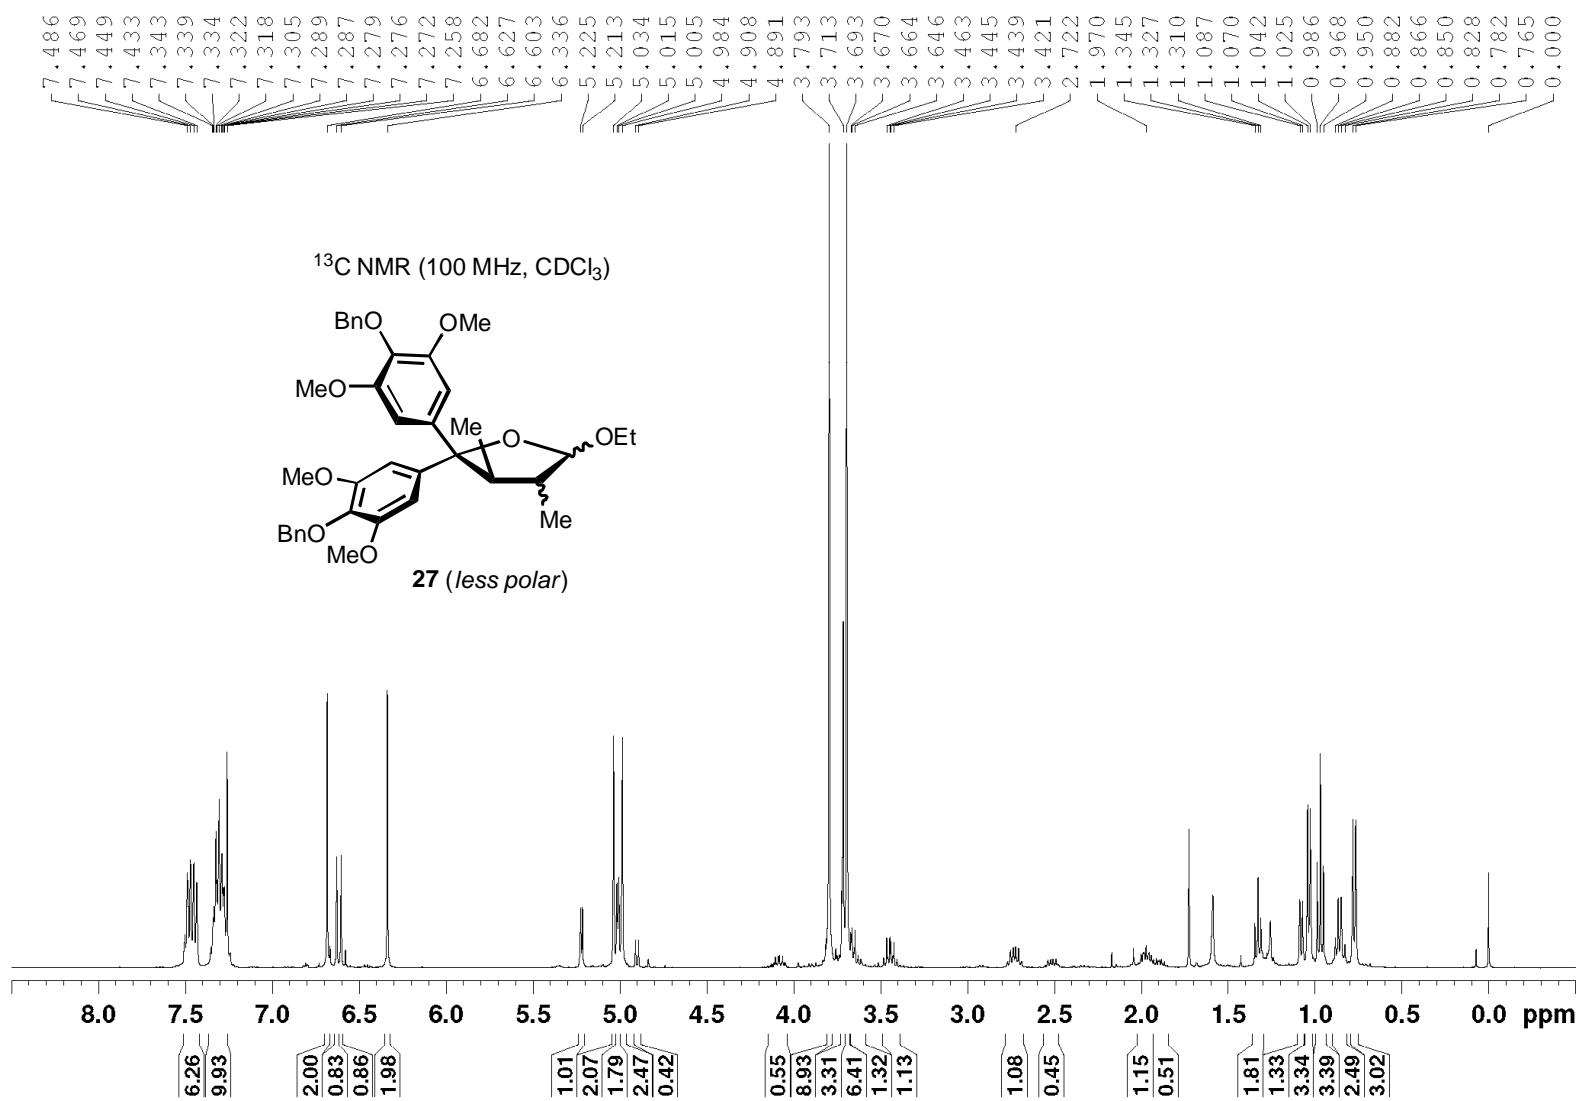

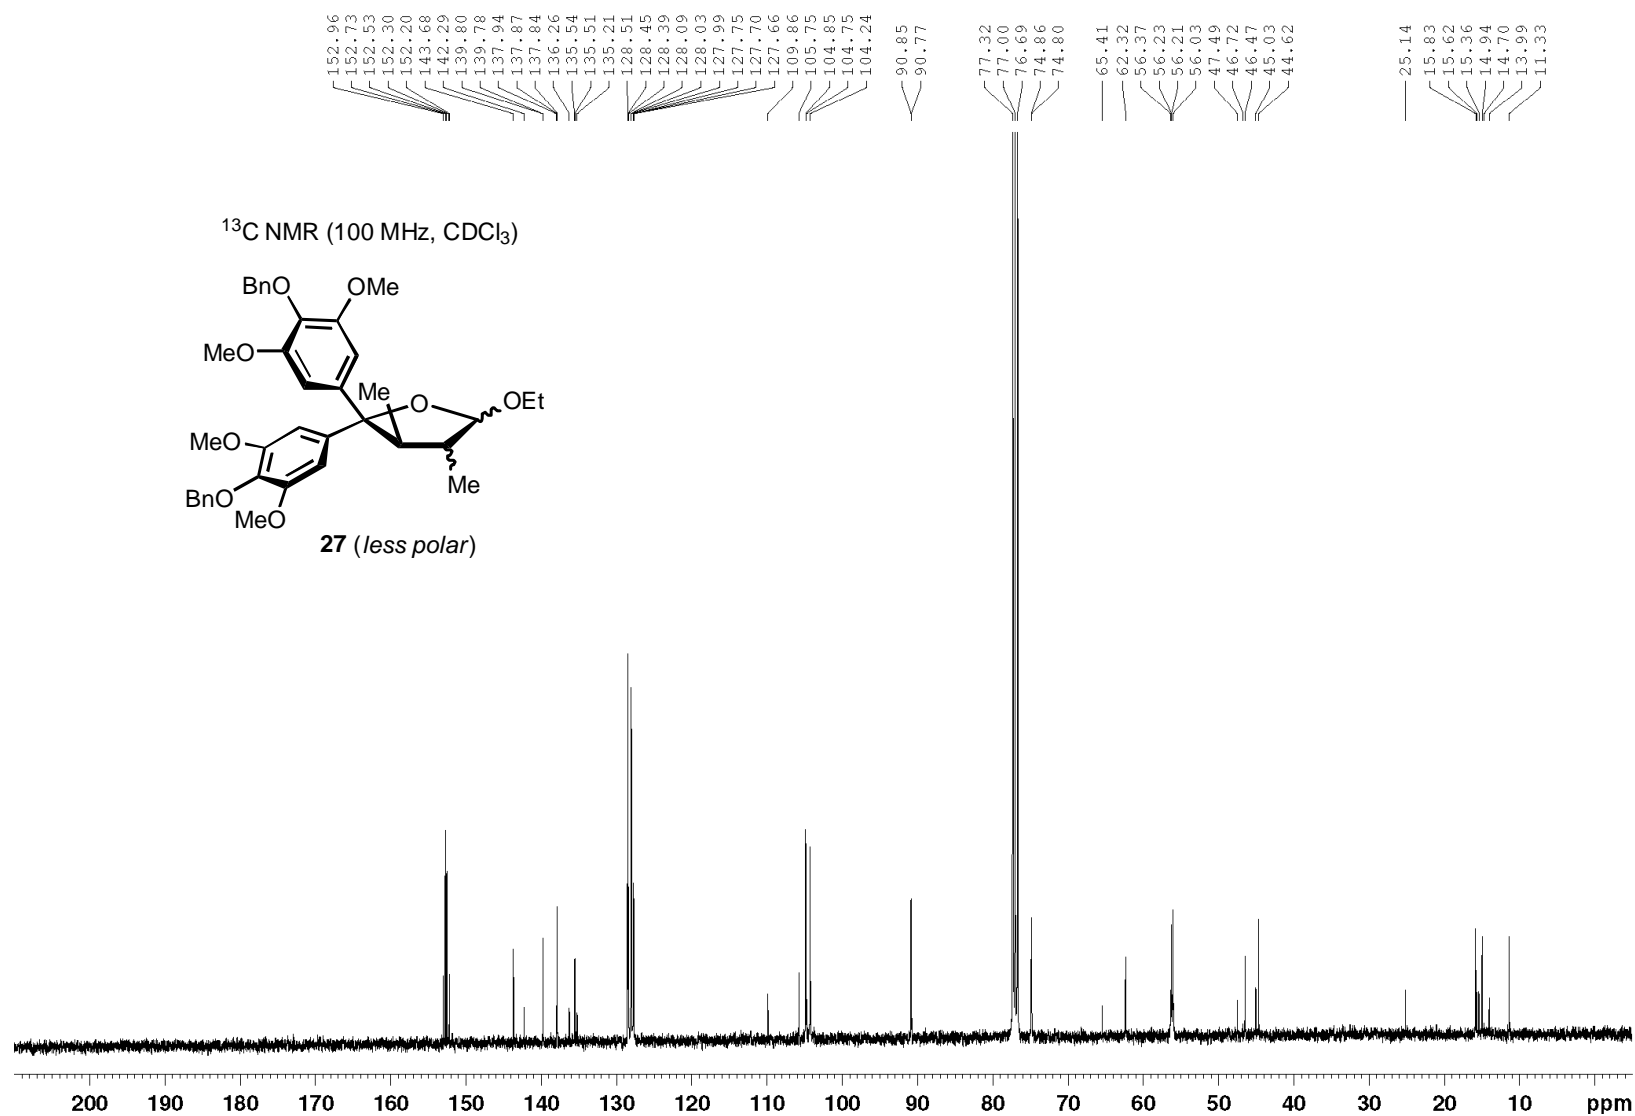

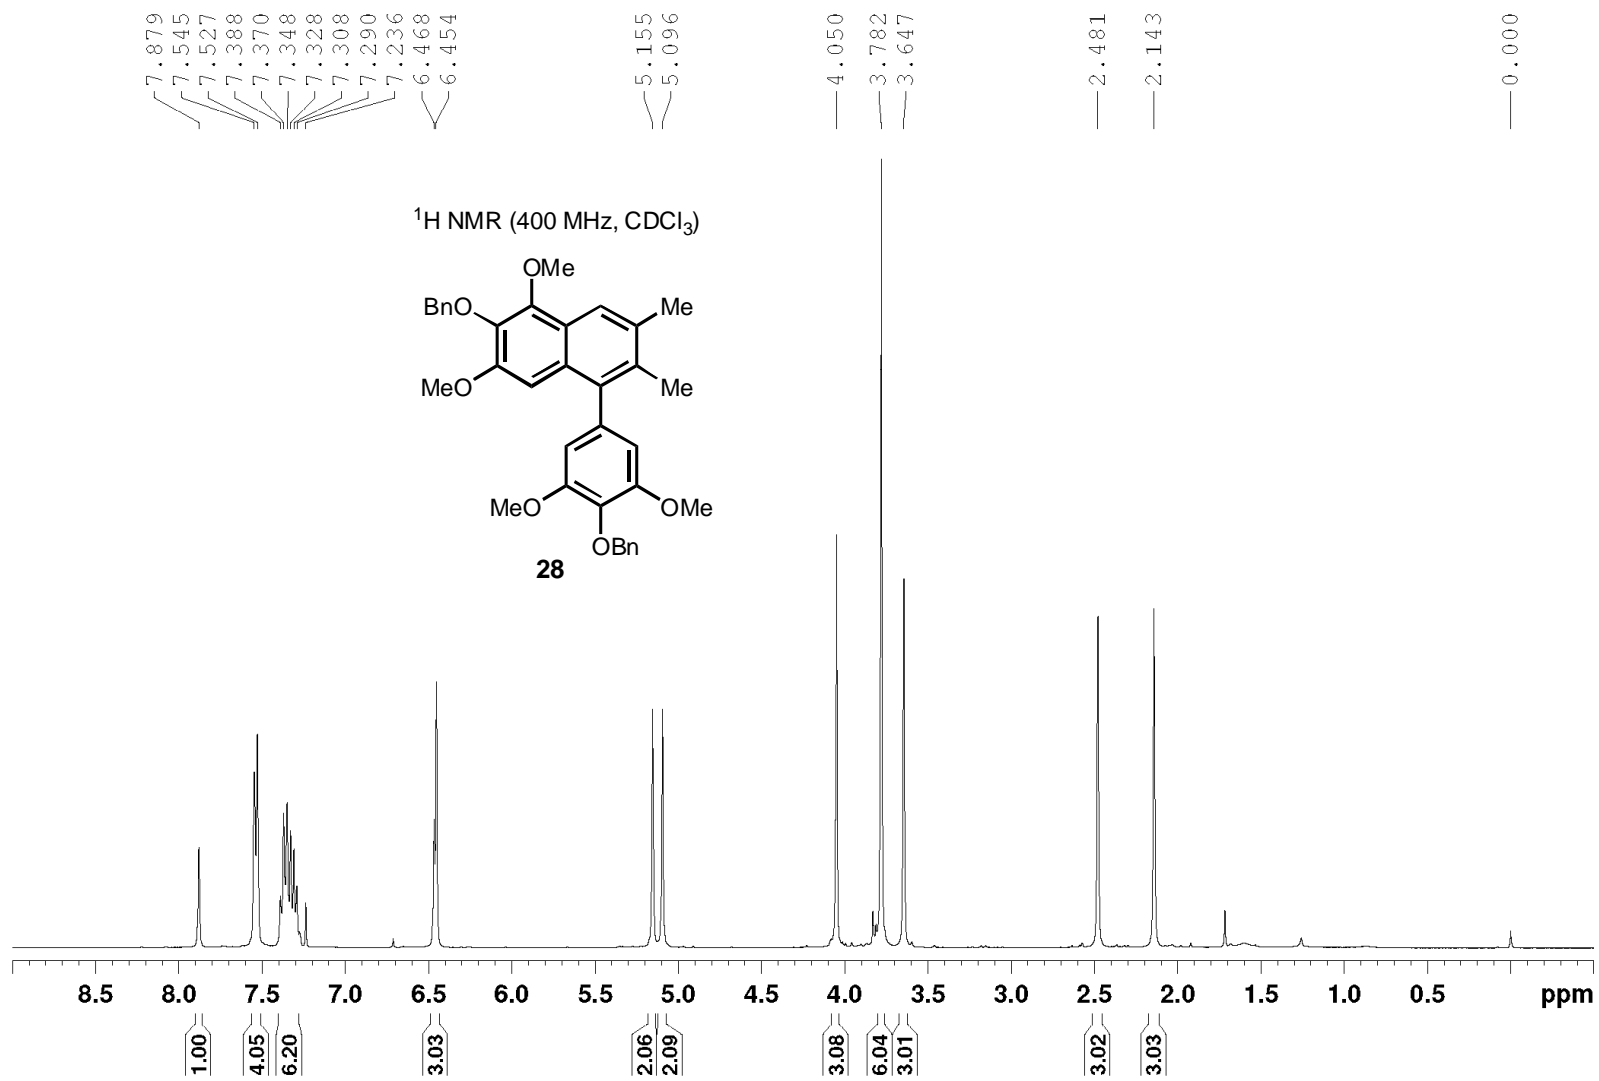

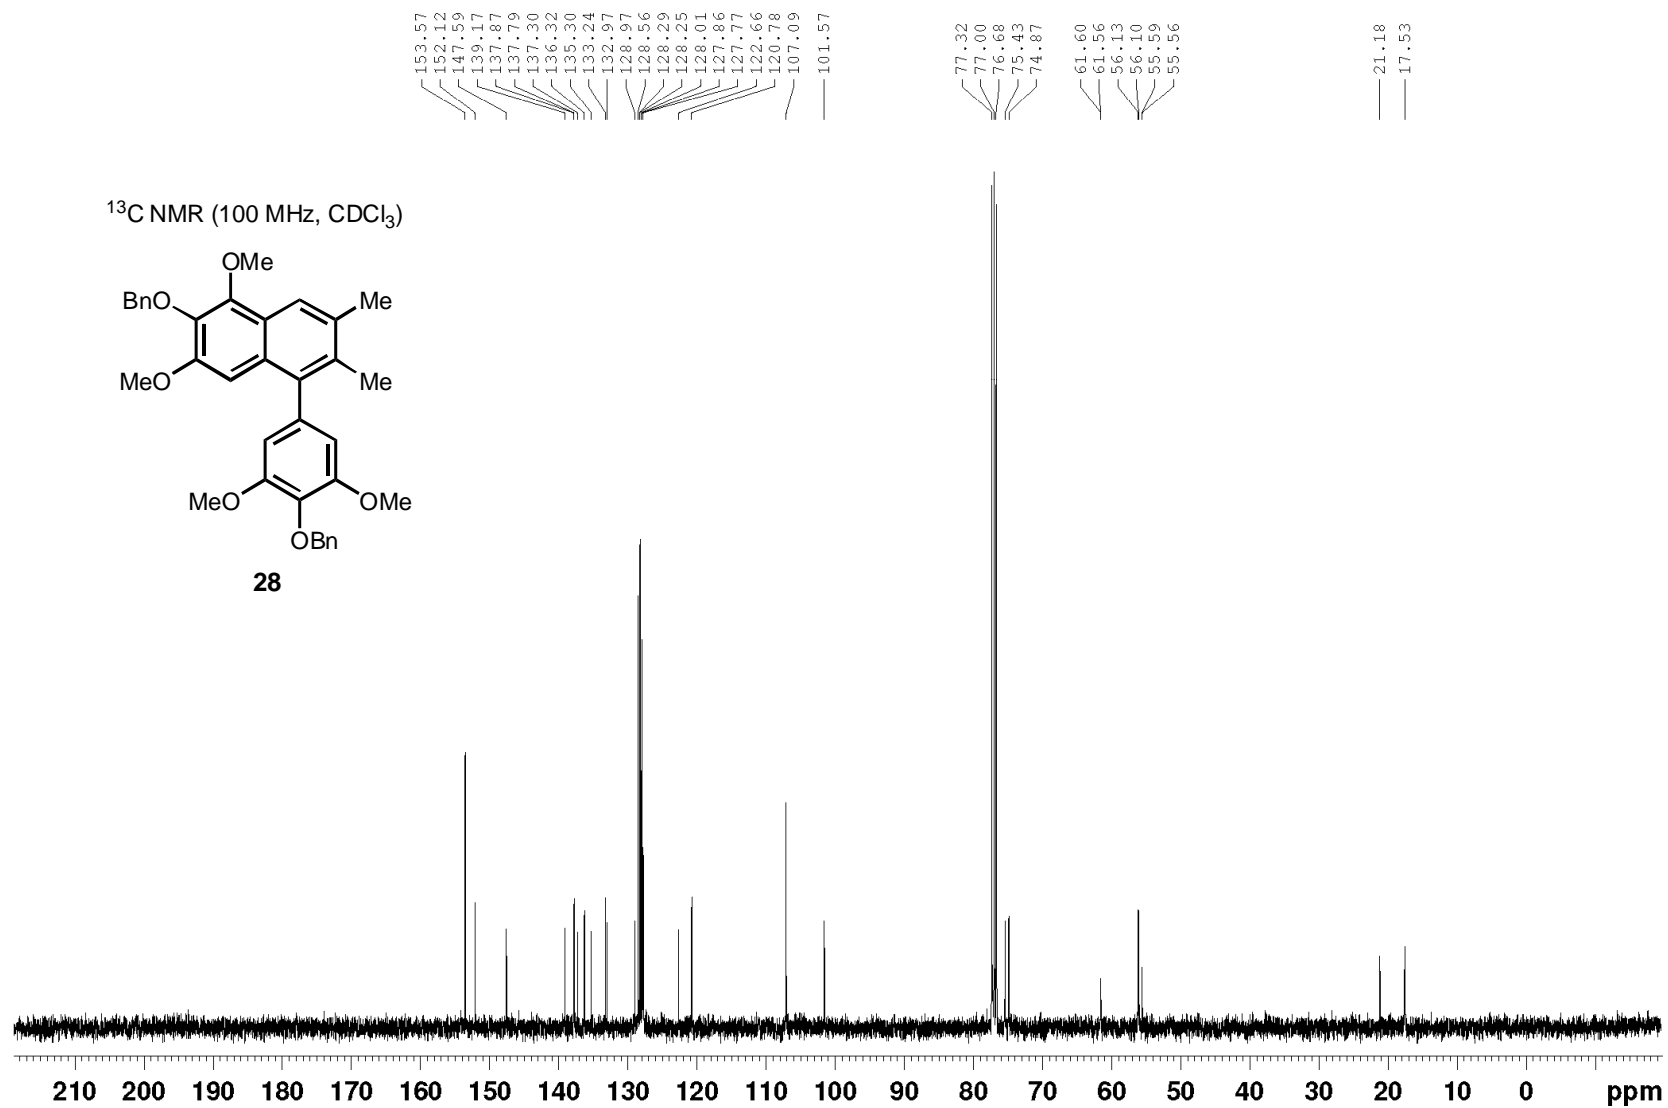

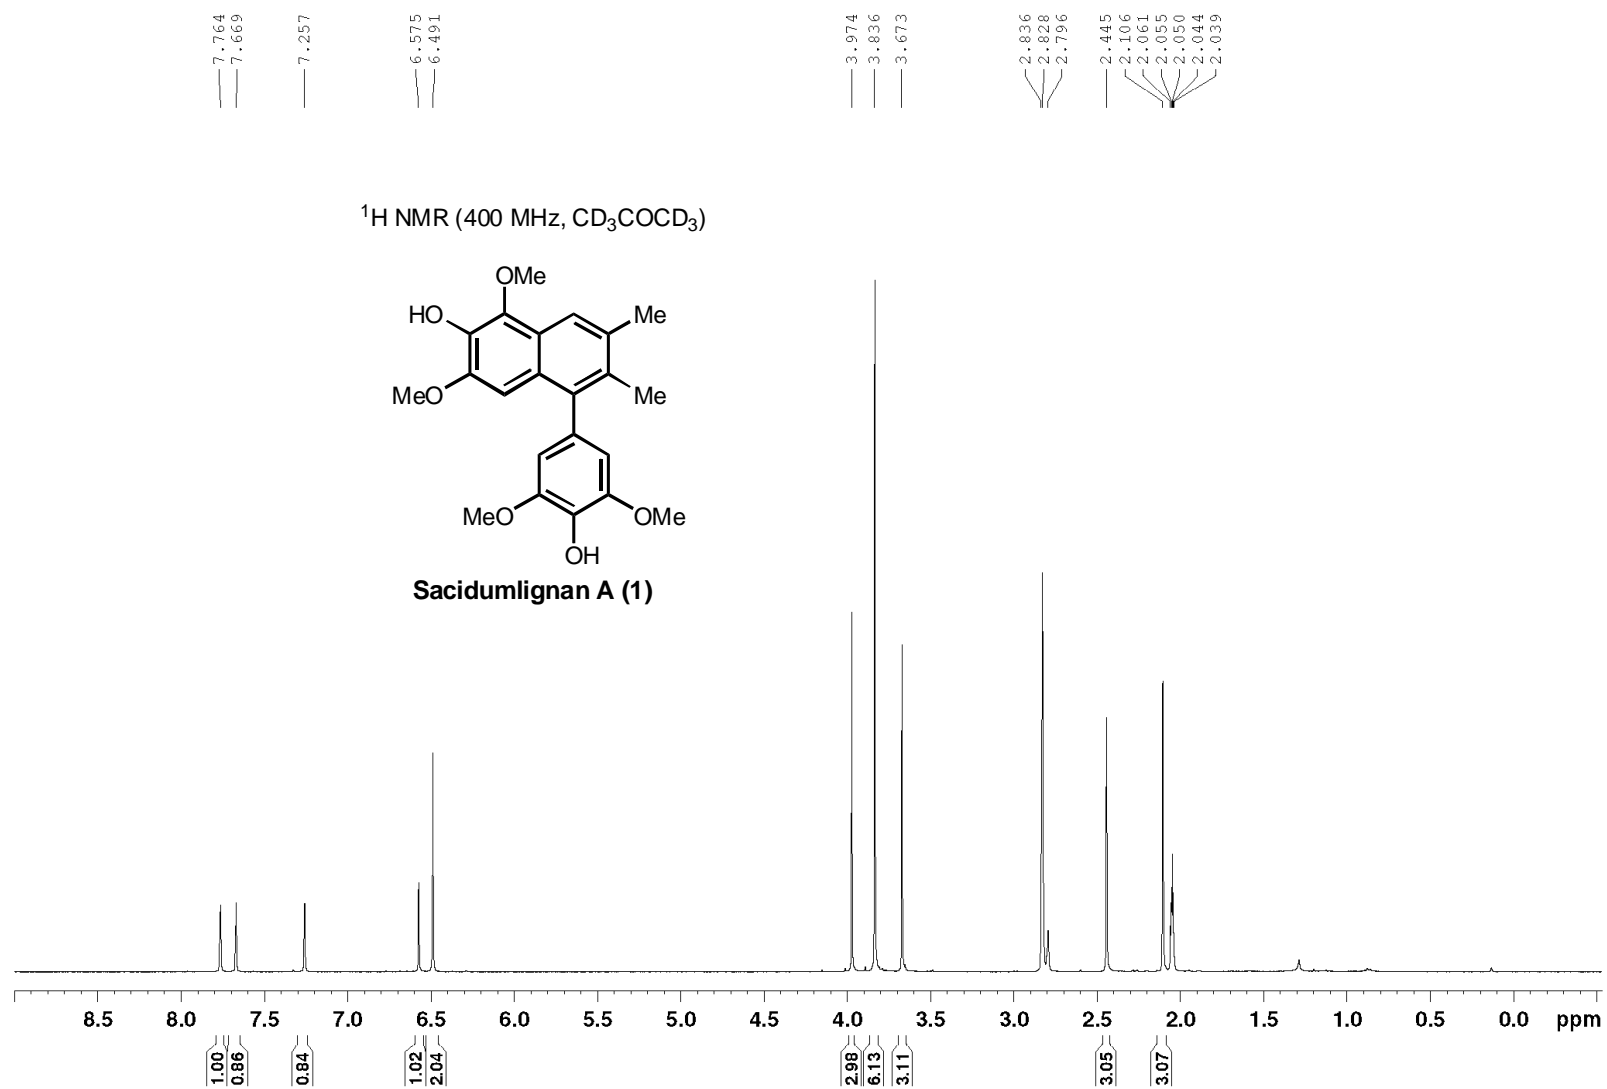

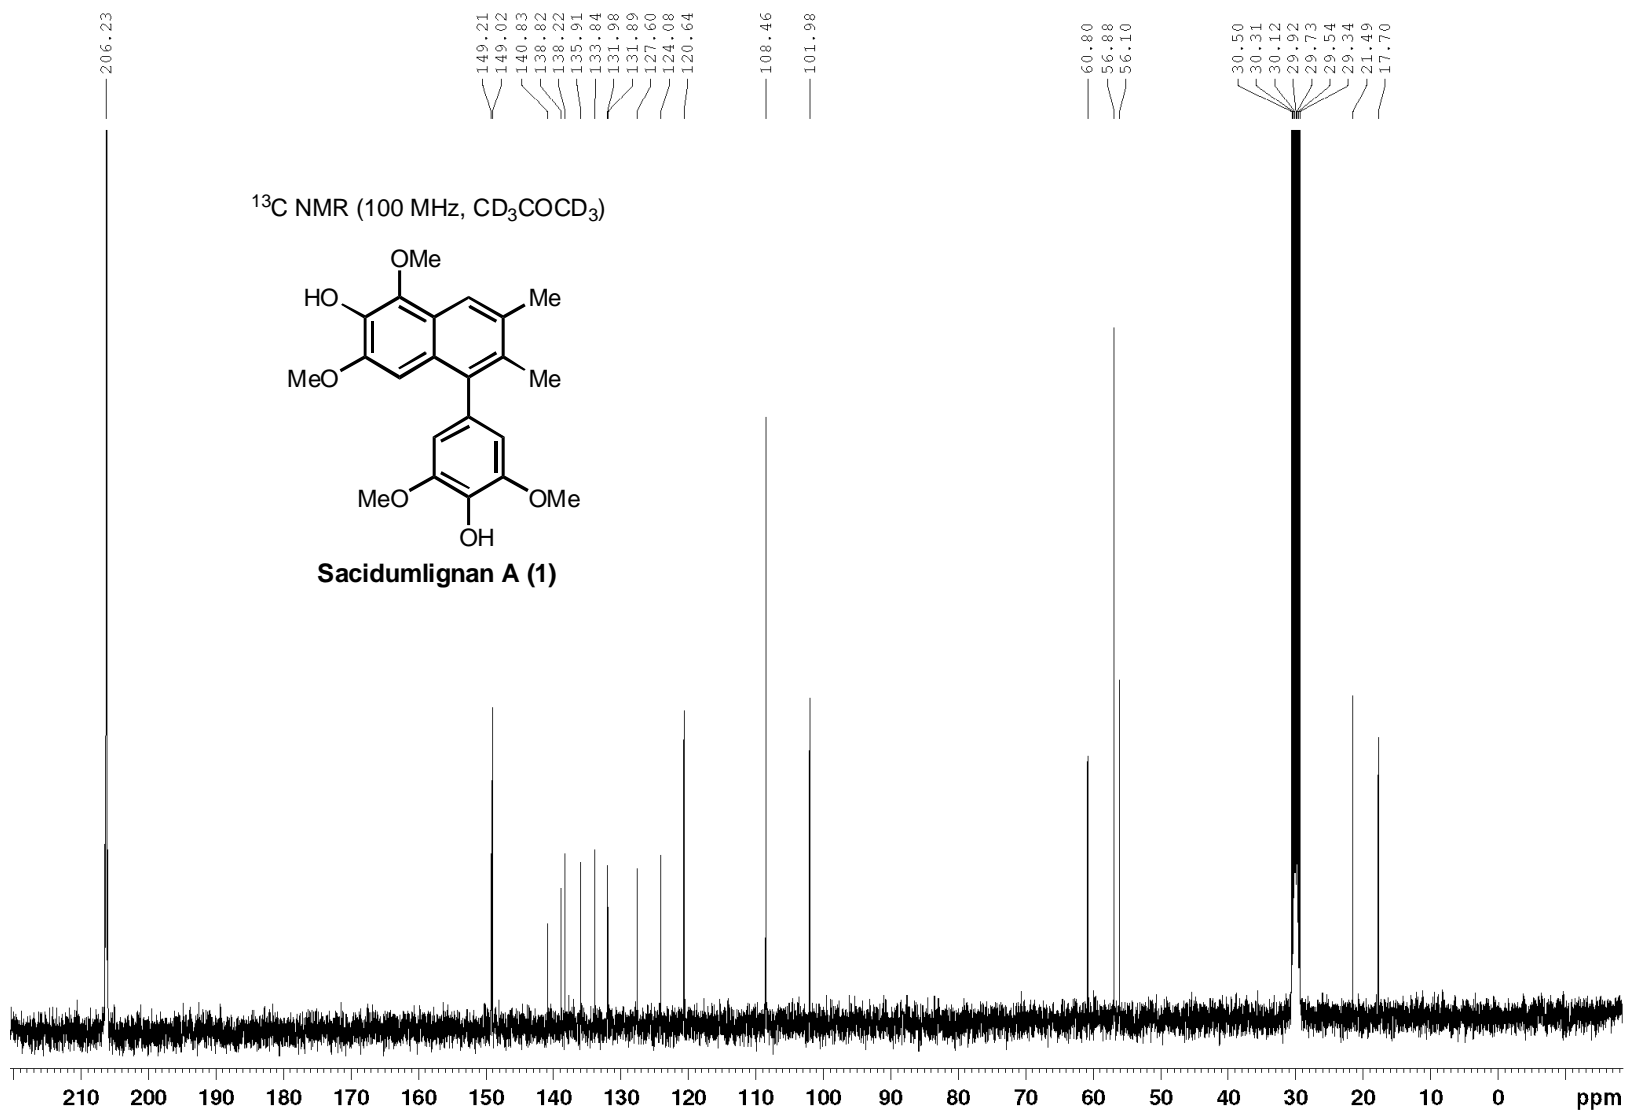

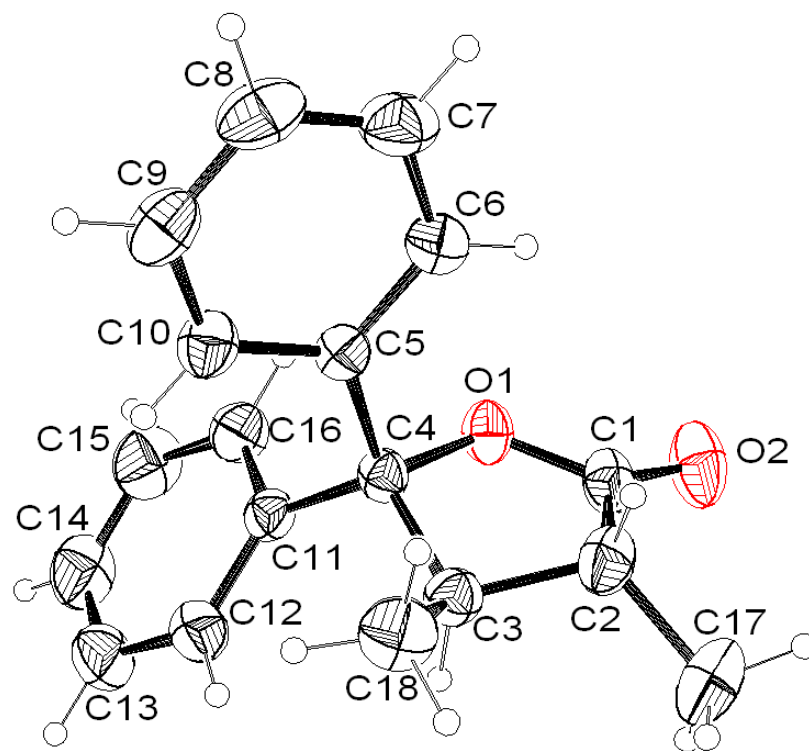

**Figure S1.** The X-ray structure of **9** with thermal ellipsoids at 30% probability.



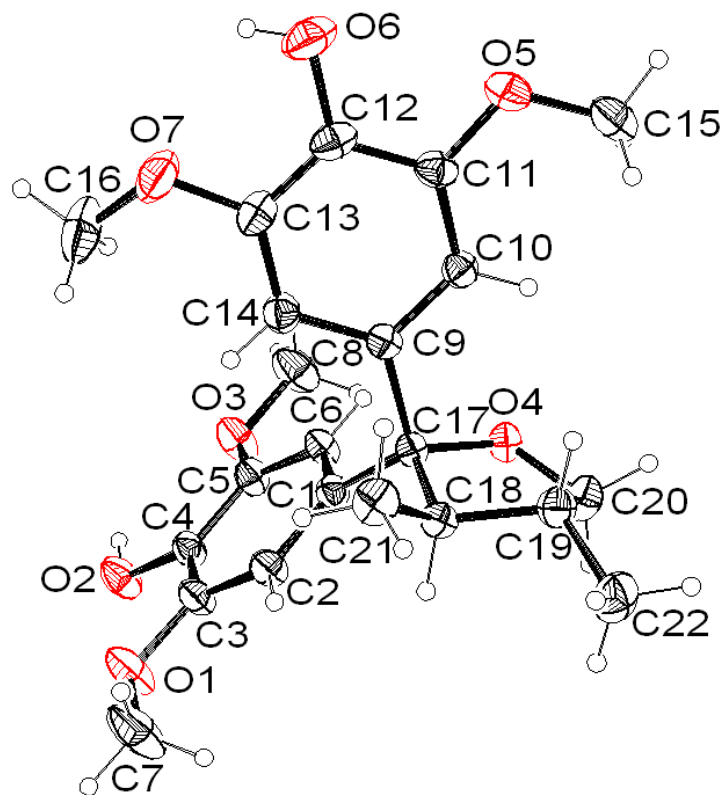

**Figure S2.** The X-ray structure of ( $\pm$ )-Sacidumligna D (**4**) with thermal ellipsoids at 30% probability.

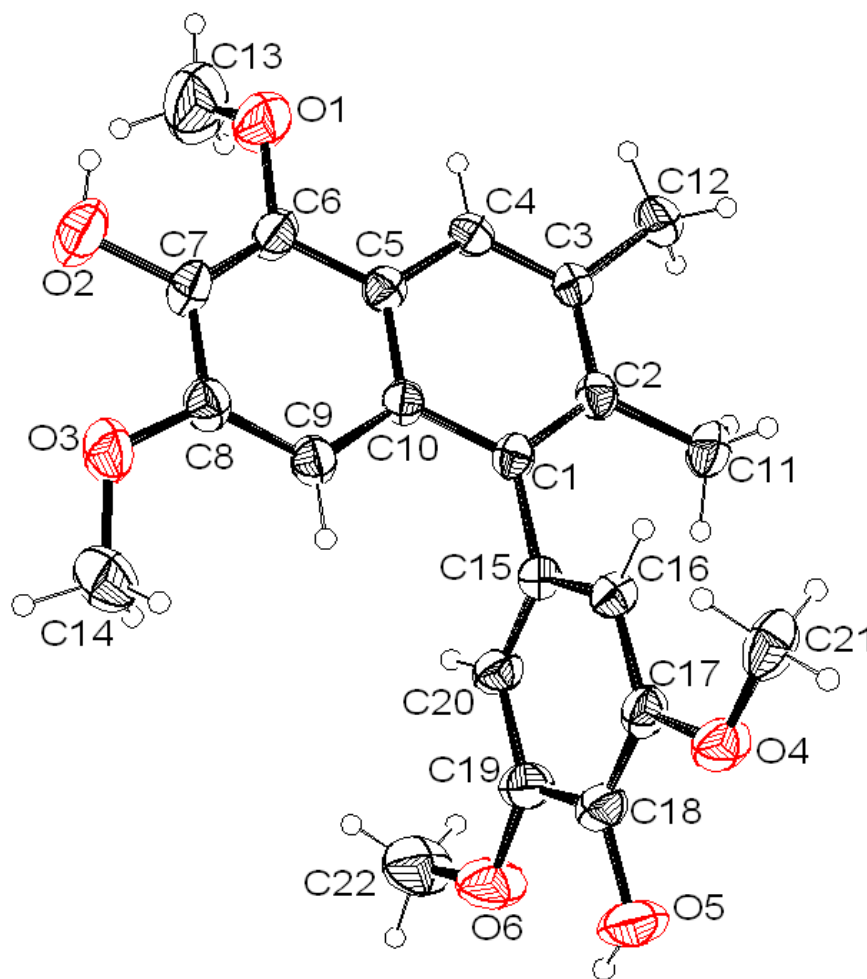

**Figure S3.** The X-ray structure of **Sacidumligna A (1)** with thermal ellipsoids at 30% probability.
